# Supplementary material for: The unique synaptic circuitry of specialized olfactory glomeruli in Drosophila melanogaster
Source: eLife. 2025 Oct 20;12:RP88824. doi: 10.7554/eLife.88824 (PMC12537010; doi:10.7554/eLife.88824)
Supplement: Figure 2—source data 1. [file elife-88824-fig2-data1.xlsx]

## Sheet: OSN
	Skeleton ID	branchpoints	length (µm)	branchpoint density (#/µm)
DA2	21783	17	68.244	0.249106
DA2	25146	15	49.729	0.301635
DA2	48162	8	34.096	0.234632
DA2	82695	10	38.305	0.261063
DA2	73054	9	42.814	0.210212
DA2	17280	14	52.81	0.265101
DA2	21005	15	48.919	0.306629
DA2	1681	9	46.603	0.193121
DA2	81059	7	37.378	0.187276
DA2	58623	8	50.795	0.157496
DA2	26537	5	20.14	0.248262
DA2	71286	18	56.608	0.317976
DA2	90071	17	60.423	0.28135
DA2	87466	18	62.594	0.287567
DA2	87395	16	58.995	0.271209
DA2	87475	15	64.662	0.231976
DA2	100279	14	49.961	0.280219
DA2	101529	7	17.846	0.392245
DA2	101554	8	22.727	0.352004
DA2	21319	19	55.695	0.341144
DA2	10388	26	68.814	0.37783
DA2	52419	17	63.489	0.267763
DA2	51635	14	62.403	0.224348
DA2	32870	15	51.542	0.291025
DA2	82671	5	12.401	0.403193
DA2	83809	9	35.659	0.252391
DA2	82413	11	41.802	0.263145
DA2	81915	27	72.808	0.370838
DA2	92342	3	14.024	0.213919
DA2	9149	4	9.82	0.407332
DA2	71797	9	45.887	0.196134
DA2	81927	12	51.62	0.232468
DA2	78159	20	68.289	0.292873
DA2	87538	16	51.35	0.311587
DA2	89169	15	48.849	0.307069
DA2	94347	31	85.292	0.363457
DA2	94292	17	55.105	0.308502
DA2	11624	20	61.083	0.327423
DA2	101606	16	61.677	0.259416
DA2	271424	2	7.408	0.269978
DA2	22870	13	55.923	0.232462
DA2	47700	14	53.43	0.262025
DA2	48086	8	35.918	0.22273
mean		13.3256	47.766	0.279724
STDV		6.29331	18.1289	0.0603169	0
SEM		0.959721	73.8161	0.00919824
DL5	134998	16	72.492	0.220714
DL5	150564	21	62.109	0.338115
DL5	111993	12	46.463	0.25827
DL5	112078	23	77.268	0.297665
DL5	112135	7	32.189	0.217466
DL5	112162	12	50.284	0.238644
DL5	113539	8	26.997	0.296329
DL5	113676	19	64.656	0.293863
DL5	113686	20	73.871	0.270742
DL5	113720	7	37.744	0.18546
DL5	131099	22	81.824	0.26887
DL5	137790	17	43.123	0.394221
DL5	160137	11	41.187	0.267075
DL5	113710	12	58.016	0.206839
DL5	120053	14	54.617	0.25633
DL5	125241	12	49.237	0.243719
DL5	126961	26	78.569	0.330919
DL5	145859	10	45.896	0.217884
DL5	210330	10	56.835	0.175948
DL5	145512	22	82.239	0.267513
DL5	124777	27	74.236	0.363705
DL5	126856	31	87.671	0.353595
DL5	129577	22	63.061	0.348869
DL5	132035	28	75.101	0.372831
DL5	134760	13	57.701	0.225299
DL5	154160	23	63.815	0.360417
DL5	220510	12	47.168	0.25441
DL5	112025	16	70.295	0.227612
DL5	126846	35	91.568	0.38223
DL5	134815	28	88.229	0.317356
DL5	113830	5	30.229	0.165404
DL5	120048	16	52.543	0.304512
DL5	148992	3	18.897	0.158755
DL5	150217	7	22.44	0.311943
DL5	160746	12	35.758	0.335589
DL5	166347	13	48.815	0.266312
DL5	202929	8	44.872	0.178285
DL5	232945	18	68.725	0.261913
DL5	238212	2	19.1	0.104712
DL5	155752	5	23.717	0.210819
DL5	178116	20	48.953	0.408555
DL5	195335	14	25.493	0.54917
DL5	244762	2	9.377	0.213288
DL5	249283	20	69.979	0.2858
DL5	177719	13	35.541	0.365775
mean		15.4222	53.5311	0.279417
STDV		7.94152	21.1324	0.0813228
SEM		1.18385	3.15024	0.0121229

## Sheet: PNs
	Skeleton ID	branchpoints	length (µm)	branchpoint density (#/µm)
DA2	30303	105	164.865	0.636885
DA2	33590	225	318.916	0.705515
DA2	70021	133	189.611	0.701436
DA2	77074	356	486.896	0.731162
DA2	107276	796	1116.92	0.712675
DA2	299483	1047	1508.74	0.693956
DA2	299511	265	402.6	0.658222
mean		418.143	598.364	0.691407
STDV		361.068	513.408	0.0326927
SEM		136.471	194.05	0.0123567
DL5	277751	32	50.978	0.627722
DL5	87877	2470	3869.73	0.638288
DL5	251229	95	138.356	0.686634
DL5	267592	96	137.128	0.700076
DL5	250859	37	52.715	0.701888
DL5	349357	61	85.513	0.713342
mean		465.167		0.677992
STDV		982.545		0.0360181
SEM		401.122		0.0147043

## Sheet: MGNs
	Skeleton ID	branchpoints	length (µm)	branchpoint density (#/µm)
DA2	34626	14	31.958	0.438075
DA2	135022	17	37.914	0.448383
DA2	27876	8	22.892	0.349467
DA2	28881	6	11.744	0.510899
DA2	87486	74	117.213	0.631329
DA2	102932	212	255.498	0.829752
DA2	33293	126	242.221	0.520186
DA2	26065	4	6.884	0.581058
DA2	18069	28	59.471	0.470818
DA2	112287	50	103.092	0.485004
DA2	262099	7	14.094	0.496665
DA2	111221	2	5.52	0.362319
DA2	351863	25	39.56	0.631951
DA2	5860	59	106.346	0.554793
DA2	155588	33	56.383	0.585283
DA2	274508	7	23.023	0.304044
DA2	44235	153	233.473	0.655322
DA2	74856	115	180.494	0.63714
DA2	93367	2	17.723	0.112848
DA2	188763	22	33.72	0.652432
DA2	2245	85	139.486	0.60938
DA2	5190	9	17.807	0.505419
DA2	5613	16	32.578	0.491129
DA2	6553	19	39.894	0.476262
DA2	7637	14	22.934	0.610447
DA2	11470	44	70.286	0.626014
DA2	12025	12	19.304	0.621633
DA2	14075	4	14.997	0.26672
DA2	14129	23	44.894	0.512318
DA2	14284	70	140.84	0.497018
DA2	16373	14	13.662	1.02474
DA2	16964	36	65.85	0.546697
DA2	19403	14	24.287	0.57644
DA2	26898	20	33.85	0.590842
DA2	28048	17	42.481	0.400179
DA2	29513	21	27.44	0.765306
DA2	30667	38	74.973	0.506849
DA2	31416	21	43.135	0.486844
DA2	33773	96	162.228	0.59176
DA2	34418	16	57.628	0.277643
DA2	35172	4	11.53	0.346921
DA2	40946	7	20.747	0.337398
DA2	41435	37	64.226	0.576091
DA2	41879	13	35.273	0.368554
DA2	42753	21	49.661	0.422867
DA2	42945	8	24.313	0.329042
DA2	44325	45	81.785	0.550223
DA2	45396	12	17.674	0.678963
DA2	49383	26	45.618	0.56995
DA2	49815	8	25.933	0.308487
DA2	50017	62	98.37	0.630273
DA2	50742	8	17.26	0.463499
DA2	55643	64	147.741	0.433191
DA2	56316	16	58.043	0.275658
DA2	56823	32	73.161	0.437392
DA2	57265	42	92.304	0.455018
DA2	57939	22	34.736	0.633349
DA2	65713	16	29.463	0.543054
DA2	68714	49	79.742	0.614482
DA2	73596	12	33.455	0.358691
DA2	76717	18	37.972	0.474033
DA2	76977	22	57.992	0.379363
DA2	77286	30	66.675	0.449944
DA2	85417	3	10.433	0.287549
DA2	87425	54	115.544	0.467354
DA2	92508	53	123.513	0.429105
DA2	93043	4	16.206	0.246822
DA2	101753	19	36.161	0.525428
DA2	101947	2	3.287	0.608458
DA2	103724	43	73.611	0.584152
DA2	105447	56	128.036	0.437377
DA2	105691	9	38.569	0.233348
DA2	108308	4	10.785	0.370885
DA2	111263	31	64.88	0.477805
DA2	135584	34	62.938	0.540214
DA2	135697	20	24.787	0.806875
DA2	136226	31	56.041	0.553166
DA2	136467	25	48.594	0.514467
DA2	228664	40	93.855	0.426189
DA2	229693	44	85.247	0.516147
DA2	230532	34	73.93	0.459894
DA2	246053	11	23.882	0.460598
DA2	249525	15	40.336	0.371876
DA2	253795	9	30.739	0.292788
DA2	254104	5	9.942	0.502917
DA2	254146	10	22.454	0.445355
DA2	261981	20	51.511	0.388267
DA2	274760	4	9.384	0.426257
DA2	279378	42	80.202	0.523678
DA2	294656	36	42.287	0.851325
DA2	296491	16	31.942	0.500908
DA2	307795	110	238.847	0.460546
DA2	68084	43	73.857	0.582206
DA2	103987	103	173.953	0.592114
DA2	53093	90	186.375	0.482897
DA2	74744	33	75.83	0.435184
DA2	55283	17	34.934	0.486632
DA2	76076	27	54.953	0.491329
DA2	86003	7	19.828	0.353036
DA2	103759	9	27.031	0.332951
DA2	294598	15	48.868	0.306949
DA2	300227	12	31.825	0.377062
DA2	107298	120	262.4	0.457317
DA2	154045	46	106.01	0.433921
DA2	108740	98	129.76	0.75524
DA2	303350	3	8.295	0.361664
DA2	38198	5	14.795	0.337952
DA2	50080	93	166.694	0.557909
DA2	68812	11	26.503	0.415047
DA2	76783	23	38.763	0.593349
DA2	81524	28	64.924	0.431273
DA2	229885	21	65.072	0.322719
DA2	83909	3	13.533	0.22168
DA2	242753	20	42.754	0.467792
DA2	15955		13.669	0
DA2	19268	8	20.351	0.393101
DA2	303509		14.4	0
DA2	86509	1	8.126	0.123062
DA2	232676	10	19.814	0.504694
DA2	270821	3	12.742	0.235442
DA2	296394	7	12.738	0.549537
DA2	28640	57	131.701	0.432799
DA2	30223	95	171.323	0.554508
DA2	44270	3	5.991	0.500751
DA2	54416	18	30.816	0.584112
DA2	59624	9	29.806	0.301953
DA2	61153	9	18.596	0.483975
DA2	61924	35	61.038	0.573413
DA2	77572	39	62.723	0.621781
DA2	82365	4	24.358	0.164217
DA2	97142	16	38.712	0.413309
DA2	99126	27	63.409	0.425807
DA2	101487	9	18.642	0.482781
DA2	103653	10	30.125	0.33195
DA2	111066	18	29.094	0.618684
DA2	228627	20	50.179	0.398573
DA2	228644	10	19.546	0.511614
DA2	239504	30	54.014	0.555412
DA2	243699	5	17.507	0.2856
DA2	295881	19	28.32	0.670904
DA2	340241	57	96.478	0.590808
DA2	38262	7	21.348	0.3279
DA2	102411	29	69.056	0.419949
DA2	23752	93	181.563	0.512219
DA2	70931	77	160.709	0.479127
DA2	38640	245	355.62	0.688938
DA2	49943	30	62.163	0.482602
DA2	109134	56	97.154	0.576404
DA2	81152	6	30.86	0.194426
DA2	101065	18	49.598	0.362918
DA2	229729	38	69.371	0.547779
DA2	229709	28	52.761	0.530695
DA2	57363	9	19.012	0.473385
DA2	94071	9	31.931	0.281858
DA2	296026	10	24.715	0.404613
mean		32.1046	61.3963	0.470809
STDV		36.9089	59.3975	0.149372
SEM		2.98391	4.77092	0.0119979
DL5	268982	34	58.241	0.583781
DL5	290382	11	15.427	0.713036
DL5	140064	309	504.843	0.612071
DL5	185354	241	431.7	0.558258
DL5	135742	243	419.949	0.578642
DL5	146277	355	611.058	0.58096
DL5	69772	30	77.929	0.384966
DL5	233415	86	188.055	0.457313
DL5	278189	31	73.579	0.421316
DL5	140401	28	58.862	0.475689
DL5	183406	9	19.954	0.451037
DL5	253565	18	53.501	0.336442
DL5	293646	9	15.088	0.596501
DL5	266320	8	16.332	0.489836
DL5	147103	7	29.995	0.233372
DL5	200808	26	65.646	0.396064
DL5	143605	34	75.234	0.451923
DL5	115385	11	16.395	0.670936
DL5	117904	9	18.44	0.488069
DL5	118310	3	11.937	0.251319
DL5	121097	104	242.221	0.42936
DL5	122549	65	117.12	0.554986
DL5	129882	16	30.572	0.523355
DL5	132722	13	30.592	0.424948
DL5	139767	15	28.047	0.534817
DL5	141939	3	10.696	0.280479
DL5	150421	36	84.724	0.424909
DL5	152572	15	19.112	0.784847
DL5	154941	9	20.278	0.443831
DL5	156016	7	14.279	0.49023
DL5	160172	44	101.066	0.435359
DL5	160604	4	9.562	0.418323
DL5	162231	11	20.347	0.54062
DL5	165842	6	11.559	0.519076
DL5	166706	46	107.135	0.429365
DL5	167153	34	44.791	0.759081
DL5	176771	27	66.128	0.408299
DL5	179462	70	132.648	0.527712
DL5	183482	16	31.169	0.513331
DL5	186414	5	12.758	0.391911
DL5	186717	45	82.745	0.54384
DL5	186729	33	51.234	0.644104
DL5	189540	10	18.443	0.542211
DL5	191107	61	115.535	0.527979
DL5	191844	18	43.932	0.409724
DL5	195585	26	33.383	0.77884
DL5	202658	17	30.689	0.553944
DL5	204386	57	145.554	0.391607
DL5	204446	29	52.198	0.555577
DL5	206781	13	24.356	0.533749
DL5	206826	11	56.025	0.196341
DL5	208693	25	46.641	0.536009
DL5	213643	14	38.824	0.360602
DL5	214242	2	8.818	0.226809
DL5	214342	43	99.936	0.430275
DL5	214560	17	35.8	0.47486
DL5	214758	16	32.432	0.49334
DL5	215028	17	55.646	0.305503
DL5	215375	16	32.601	0.490782
DL5	215714	17	29.643	0.573491
DL5	216156	11	21.514	0.511295
DL5	216250	12	21.549	0.55687
DL5	221273	13	24.662	0.527127
DL5	225454	11	21.844	0.503571
DL5	227796	10	19.774	0.505715
DL5	228158	2	12.044	0.166058
DL5	245177	13	28.987	0.448477
DL5	250353	42	96.896	0.433454
DL5	252367	45	74.99	0.60008
DL5	254711	9	16.516	0.544926
DL5	254967	10	20.833	0.480008
DL5	255047	10	19.427	0.514748
DL5	255362	55	96.484	0.570043
DL5	258637	5	11.689	0.427753
DL5	260442	17	33.388	0.509165
DL5	261612	26	38.207	0.680504
DL5	263637	2	10.851	0.184315
DL5	266804	5	13.181	0.379334
DL5	266869	34	48.476	0.701378
DL5	266995	7	16.238	0.431088
DL5	269002	7	16.762	0.417611
DL5	269065	18	23.865	0.754243
DL5	269084	6	10.206	0.587889
DL5	270297	4	13.022	0.307172
DL5	271938	8	17.416	0.459348
DL5	272387	10	16.06	0.622665
DL5	273065	14	18.477	0.757699
DL5	273388	4	8.201	0.487745
DL5	274113	5	6.706	0.745601
DL5	275340	8	8.519	0.939077
DL5	275366	7	13.392	0.5227
DL5	276344	32	47.495	0.673755
DL5	277139	10	17.619	0.567569
DL5	277149	11	16.456	0.668449
DL5	219558	35	59.746	0.585813
DL5	137519	13	63.411	0.205012
DL5	168292	21	32.668	0.642831
DL5	209947	32	65.467	0.488796
DL5	219338	11	34.299	0.320709
DL5	259759	113	241.843	0.467245
DL5	260683	34	43.517	0.781304
DL5	128092	25	63.73	0.39228
DL5	237362	10	26.652	0.375206
DL5	291191	13	27.798	0.46766
DL5	203594	46	108.381	0.424429
DL5	215645	29	64.264	0.451264
DL5	262965	23	51.892	0.443228
DL5	145837	101	263.097	0.383889
DL5	198761	62	160.018	0.387456
DL5	250426	90	186.287	0.483125
DL5	290368	18	36.665	0.490931
DL5	170885	24	84.22	0.284968
DL5	227598	5	19.87	0.251636
DL5	153851	8	35.624	0.224568
DL5	123078	19	45.4	0.418502
DL5	178413	8	24.893	0.321375
DL5	193363	62	129.779	0.477735
DL5	266380	49	84.825	0.57766
DL5	319423	216	442.694	0.487922
DL5	69801	37	47.373	0.781036
DL5	155761	27	54.159	0.498532
DL5	159556	13	23.7	0.548523
DL5	180563	38	80.33	0.473049
DL5	183560	28	69.851	0.400853
DL5	188300	73	113.356	0.643989
DL5	190253	24	47.557	0.504658
DL5	192197	110	192.346	0.571886
DL5	193575	60	94.158	0.637227
DL5	200977	19	40.069	0.474182
DL5	201373	13	36.206	0.359057
DL5	209089	14	34.475	0.406091
DL5	209339	28	59.692	0.469075
DL5	213309	29	73.845	0.392714
DL5	214462	15	32.364	0.463478
DL5	218020	20	40.627	0.492283
DL5	218138	12	35.464	0.338371
DL5	220294	41	101.064	0.405684
DL5	222011	27	43.045	0.627251
DL5	222057	27	71.625	0.376963
DL5	224040	18	49.1	0.366599
DL5	225234	8	23.226	0.344442
DL5	225492	42	69.214	0.606814
DL5	226160	11	26.575	0.413923
DL5	227977	8	19.083	0.419221
DL5	263196	17	17.514	0.970652
DL5	266395	10	18.756	0.533163
DL5	348783	29	45.71	0.634434
DL5	215889	18	34.89	0.515907
DL5	151172	76	123.863	0.613581
DL5	173341	100	199.868	0.50033
DL5	129691	81	169.09	0.479035
DL5	138427	44	123.305	0.356839
DL5	143671	45	132.1	0.340651
DL5	152746	25	60.919	0.410381
DL5	175859	32	71.268	0.449009
DL5	190555	26	62.834	0.413789
DL5	192913	30	58.847	0.509797
DL5	204311	20	51.08	0.391543
DL5	221901	22	37.938	0.579894
DL5	119785	67	161.818	0.414045
DL5	185408	15	22.973	0.65294
DL5	188428	10	24.477	0.408547
DL5	244863	23	40.458	0.568491
DL5	246218	13	18.753	0.693222
DL5	263253	17	29.541	0.575471
DL5	269017	6	12.135	0.494438
DL5	273424	15	24.082	0.622872
DL5	274134	2	7.361	0.271702
DL5	278088	9	11.077	0.812494
DL5	282267	151	253.844	0.594854
DL5	130369	11	39.125	0.28115
DL5	148943	24	53.844	0.445732
DL5	153562	62	121.326	0.51102
DL5	169408	61	126.95	0.480504
DL5	179092	24	59.157	0.4057
DL5	201801	24	57.276	0.419024
DL5	215753	3	5.058	0.59312
DL5	238845	41	88.922	0.461078
DL5	252805	4	16.482	0.242689
DL5	318949	32	71.516	0.447452
DL5	181985	60	161.783	0.370867
DL5	162407	30	62.379	0.480931
DL5	170300	51	111.941	0.455597
DL5	178291	15	40.982	0.366014
DL5	207885	14	32.279	0.433719
mean		33.4378	67.8498	0.488527
STDV		47.5712	86.4128	0.135797
SEM		3.4975	6.3532	0.00998398
