# Supplementary material for: The unique synaptic circuitry of specialized olfactory glomeruli in Drosophila melanogaster
Source: eLife. 2025 Oct 20;12:RP88824. doi: 10.7554/eLife.88824 (PMC12537010; doi:10.7554/eLife.88824)
Supplement: Figure 4—source data 1. [file elife-88824-fig4-data1.xlsx]

## Sheet: 210203_DA2_DL5_OSNs_in_out
Name	Id	Soma	length (µm)	input/length	output/ length	T-bar/length	poliadicity	OSNout	PNout	MGNout	OSNrelout	PNrelout	MGNrelout	OSNin	PNin	MGNin	OSNrelin	PNrelin	MGNrelin
OSN#24	25146	ipsi	49.729	0.663597	4.60496	0.80436	5.725	16	84	101	7.9602	41.791	50.2488	11	0	22	33.3333	0	66.6667
OSN#9	51635	ipsi	61.325	0.619649	4.17448	0.766408	5.44681	17	104	95	7.87037	48.1481	43.9815	13	0	25	34.2105	0	65.7895
OSN#14	71286	ipsi	54.771	0.346899	2.70216	0.41993	6.43478	5	67	53	4	53.6	42.4	4	0	15	21.0526	0	78.9474
OSN#29	71797	ipsi	42.345	0.401464	3.44787	0.543157	6.34783	7	64	42	6.19469	56.6372	37.1681	6	0	11	35.2941	0	64.7059
OSN#3	78159	ipsi	67.853	0.486345	3.56653	0.618985	5.7619	14	94	107	6.51163	43.7209	49.7674	14	0	19	42.4242	0	57.5758
OSN#2	81915	ipsi	72.659	0.509228	3.12418	0.56428	5.53659	18	86	86	9.47368	45.2632	45.2632	12	0	25	32.4324	0	67.5676
OSN#8	87466	ipsi	61.638	0.600279	3.6179	0.64895	5.575	17	101	77	8.71795	51.7949	39.4872	17	0	20	45.9459	0	54.0541
OSN#12	90071	ipsi	60.197	0.598036	2.97357	0.564812	5.26471	16	76	62	10.3896	49.3506	40.2597	19	2	14	54.2857	5.71429	40
OSN#1	94347	ipsi	84.67	0.42518	2.4566	0.484233	5.07317	18	82	67	10.7784	49.1018	40.1198	17	0	19	47.2222	0	52.7778
n
mean			61.6874	0.516742	3.40758	0.60168	5.68509	14.2222	84.2222	76.6667	7.98851	48.8231	43.1884	12.5556	0.222222	18.8889	38.4668	0.634921	60.8983
MEDIAN			61.325	0.509228	3.44787	0.564812	5.575	16	84	77	7.9602	49.1018	42.4	13	0	19	35.2941	0	64.7059
OSN#28	1681	contra	46.158	0.476624	3.96464	0.628277	6.31034	6	64	95	3.63636	38.7879	57.5758	7	0	15	31.8182	0	68.1818
OSN#5	10388	contra	63.67	0.361238	2.05748	0.329826	6.2381	4	47	70	3.30579	38.843	57.8512	9	0	14	39.1304	0	60.8696
OSN#25	17280	contra	48.36	0.454921	3.84615	0.641026	6	6	61	101	3.57143	36.3095	60.119	6	1	15	27.2727	4.54545	68.1818
OSN#26	21005	contra	48.828	0.286721	3.42017	0.471041	7.26087	5	51	99	3.22581	32.9032	63.871	5	0	9	35.7143	0	64.2857
OSN#15	21319	contra	53.227	0.338174	2.53631	0.356962	7.10526	7	39	66	6.25	34.8214	58.9286	6	2	10	33.3333	11.1111	55.5556
OSN#4	21783	contra	67.266	0.356792	2.79487	0.386525	7.23077	3	67	99	1.77515	39.645	58.5799	5	2	17	20.8333	8.33333	70.8333
OSN#39	26537	contra	19.324	0.413993	6.41689	0.724488	8.85714	3	42	75	2.5	35	62.5	1	0	7	12.5	0	87.5
OSN#18	47700	contra	52.818	0.473323	3.82445	0.586921	6.51613	6	55	120	3.31492	30.3867	66.2983	11	0	14	44	0	56
OSN#33	48086	contra	35.92	0.528953	3.3686	0.473274	7.11765	5	44	62	4.5045	39.6396	55.8559	3	0	16	15.7895	0	84.2105
OSN#35	48162	contra	33.455	0.418473	4.84233	0.6576	7.36364	7	51	88	4.79452	34.9315	60.274	5	0	9	35.7143	0	64.2857
OSN#7	52419	contra	56.534	0.371458	3.13086	0.406835	7.69565	3	59	93	1.93548	38.0645	60	6	0	15	28.5714	0	71.4286
OSN#30	73054	contra	42.831	0.256823	2.56823	0.396909	6.47059	3	34	60	3.09278	35.0515	61.8557	4	0	7	36.3636	0	63.6364
OSN#22	81927	contra	48.586	0.391059	3.95176	0.514552	7.68	7	56	95	4.43038	35.443	60.1266	7	1	11	36.8421	5.26316	57.8947
OSN#31	82413	contra	39.13	0.61334	5.18784	0.664452	7.80769	12	51	113	6.81818	28.9773	64.2045	10	1	13	41.6667	4.16667	54.1667
OSN#34	83809	contra	34.387	0.348969	3.0244	0.494373	6.11765	1	29	54	1.19048	34.5238	64.2857	4	0	8	33.3333	0	66.6667
OSN#13	87395	contra	58.623	0.27293	2.45637	0.392337	6.26087	6	51	76	4.51128	38.3459	57.1429	6	0	10	37.5	0	62.5
OSN#20	87538	contra	51.35	0.545278	4.28432	0.623174	6.875	8	65	125	4.0404	32.8283	63.1313	10	0	18	35.7143	0	64.2857
OSN#17	94292	contra	55.105	0.435532	2.77652	0.453679	6.12	1	57	79	0.729927	41.6058	57.6642	4	0	20	16.6667	0	83.3333
OSN#40	101529	contra	17.847	0.392223	3.41794	0.560318	6.1	1	15	37	1.88679	28.3019	69.8113	4	0	3	57.1429	0	42.8571
n
mean			45.9694	0.407201	3.57211	0.513819	6.90144	4.94737	49.3684	84.5789	3.44811	35.4953	61.0566	5.94737	0.368421	12.1579	32.6267	1.75893	65.6144
MEDIAN			48.586	0.392223	3.41794	0.494373	6.875	5	51	88	3.31492	35.0515	60.1266	6	0	13	35.7143	0	64.2857
