# Supplementary material for: The unique synaptic circuitry of specialized olfactory glomeruli in Drosophila melanogaster
Source: eLife. 2025 Oct 20;12:RP88824. doi: 10.7554/eLife.88824 (PMC12537010; doi:10.7554/eLife.88824)
Supplement: Figure 4—source data 2. [file elife-88824-fig4-data2.xlsx]

## Sheet: DL5 OSNs
	Skeleton	Soma	length (µm)	input/ length	output/ length	T-bar/ length	poliadicity	OSNout	PNout	MGNout	OSNrelout	PNrelout	MGNrelout	OSNin	PNin	MGNin	OSNrelin	PNrelin	MGNrelin
OSN#1	126846	ipsi	101.391	0.424101	1.36107	0.266296	5.11111	7	59	43	6.42202	54.1284	39.4495	12	0	30	28.5714	0	71.4286
OSN#4	126856	ipsi	95.521	0.366412	2.20894	0.439694	5.02381	7	100	68	4	57.1429	38.8571	6	0	28	17.6471	0	82.3529
OSN#15	129577	ipsi	70.509	0.553121	2.5245	0.496391	5.08571	8	77	58	5.59441	53.8462	40.5594	13	0	25	34.2105	0	65.7895
OSN#10	132035	ipsi	84.168	0.392073	1.98413	0.403954	4.91176	9	85	58	5.92105	55.9211	38.1579	7	0	25	21.875	0	78.125
OSN#21	134760	ipsi	65.72	0.213025	1.6129	0.365186	4.41667	2	58	36	2.08333	60.4167	37.5	2	0	12	14.2857	0	85.7143
OSN#9	134998	ipsi	86.447	0.543686	2.56805	0.543686	4.7234	16	103	65	8.69565	55.9783	35.3261	15	2	30	31.9149	4.25532	63.8298
OSN#5	145512	ipsi	91.883	0.47887	0.92509	0.185018	5	4	37	26	5.97015	55.2239	38.806	13	2	28	30.2326	4.65116	65.1163
OSN#17	154160	ipsi	69.273	0.519683	1.70341	0.317584	5.36364	6	53	38	6.18557	54.6392	39.1753	13	0	23	36.1111	0	63.8889
OSN#25	220510	ipsi	55.579	0.233901	1.67329	0.377841	4.42857	8	44	31	9.63855	53.012	37.3494	1	2	9	8.33333	16.6667	75
n	9
mean			80.0546	0.413875	1.84015	0.377294	4.89608	7.44444	68.4444	47	6.05675	55.5898	38.3534	9.11111	0.666667	23.3333	24.798	2.84146	72.3606
MEDIAN			84.168	0.424101	1.70341	0.377841	5	7	59	43	5.97015	55.2239	38.806	12	0	25	28.5714	0	71.4286
OSN#30	111993	contra	51.49	0.330161	2.8355	0.427267	6.63636	1	39	92	0.757576	29.5455	69.697	2	0	15	11.7647	0	88.2353
OSN#13	112025	contra	77.294	0.388128	3.10503	0.452817	6.85714	3	67	159	1.31004	29.2576	69.4323	2	3	25	6.66667	10	83.3333
OSN#8	112078	contra	63.908	0.516367	3.30162	0.453777	6.47059	1	50	148	0.502513	25.1256	74.3719	2	0	21	8.69565	0	91.3043
OSN#37	112135	contra	36.218	0.303716	4.03114	0.635043	6.34783	2	28	92	1.63934	22.9508	75.4098	0	0	11	0	0	100
OSN#23	112162	contra	59.209	0.405344	2.6854	0.422233	6.36	2	27	106	1.48148	20	78.5185	4	1	19	16.6667	4.16667	79.1667
OSN#39	113539	contra	29.213	0.342313	4.21045	0.51347	8.2	1	30	90	0.826446	24.7934	74.3802	2	0	8	20	0	80
OSN#16	113676	contra	70.471	0.283805	2.54005	0.425707	5.96667	4	48	109	2.48447	29.8137	67.7019	1	1	16	5.55556	5.55556	88.8889
OSN#12	113686	contra	77.871	0.43662	3.37738	0.526512	7.36364	3	72	173	1.20968	29.0323	69.7581	3	1	26	10	3.33333	86.6667
OSN#34	113720	contra	42.797	0.42059	3.64512	0.537421	6.78261	0	33	109	0	23.2394	76.7606	2	0	15	11.7647	0	88.2353
OSN#22	120053	contra	59.178	0.37176	3.41343	0.540741	6.3125	5	46	123	2.87356	26.4368	70.6897	2	0	17	10.5263	0	89.4737
OSN#32	137790	contra	47.387	0.400954	2.72227	0.44316	6.14286	1	31	79	0.900901	27.9279	71.1712	4	0	15	21.0526	0	78.9474
OSN#26	145859	contra	56.98	0.579151	3.70305	0.508951	7.27586	2	45	142	1.0582	23.8095	75.1323	2	1	29	6.25	3.125	90.625
OSN#33	160137	contra	44.148	0.294464	2.60487	0.339766	7.66667	0	24	79	0	23.301	76.699	0	0	13	0	0	100
OSN#20	210330	contra	65.774	0.380089	2.37176	0.380089	6.24	1	44	106	0.662252	29.1391	70.1987	1	0	24	4	0	96
OSN#14	232945	contra	77.107	0.440946	3.41084	0.531729	6.41463	2	70	158	0.869565	30.4348	68.6957	5	0	29	14.7059	0	85.2941
n	15
mean			57.2697	0.392961	3.1972	0.475912	6.73582	1.86667	43.6	117.667	1.10507	26.3205	72.5744	2.13333	0.466667	18.8667	9.84325	1.74537	88.4114
MEDIAN			59.178	0.388128	3.30162	0.453777	6.47059	2	44	109	0.900901	26.4368	71.1712	2	0	17	10	0	88.2353
