# Supplementary material for: The unique synaptic circuitry of specialized olfactory glomeruli in Drosophila melanogaster
Source: eLife. 2025 Oct 20;12:RP88824. doi: 10.7554/eLife.88824 (PMC12537010; doi:10.7554/eLife.88824)
Supplement: Figure 4—source data 3. [file elife-88824-fig4-data3.xlsx]

## Sheet: VA1v
output	ID	OSNout	uPNout	MGNout	total output	reloutOSN	reloutPN	reloutMGN		input	MGNin	OSNin	uPNin	total input	relinputMGN	relinputOSN	relinputuPN
ORN IPSI	3737475	37	138	166	345	10.7246	40	48.1159			68	35	1	104	65.3846	33.6538	0.961538
ORN IPSI	57015	38	150	158	347	10.951	43.2277	45.5331			49	44	2	96	51.0417	45.8333	2.08333
ORN IPSI	21783864	33	126	189	350	9.42857	36	54			53	26	1	82	64.6341	31.7073	1.21951
ORN IPSI	12122910	36	123	178	337	10.6825	36.4985	52.819			50	38	2	93	53.7634	40.8602	2.15054
ORN IPSI	23249389	34	131	179	345	9.85507	37.971	51.8841			46	36	2	84	54.7619	42.8571	2.38095
ORN IPSI	3	27	148	155	332	8.13253	44.5783	46.6867			50	35	5	93	53.7634	37.6344	5.37634
ORN IPSI	988883	28	151	137	316	8.86076	47.7848	43.3544			66	36	4	108	61.1111	33.3333	3.7037
ORN IPSI	45703556	21	163	128	312	6.73077	52.2436	41.0256			57	42	3	103	55.3398	40.7767	2.91262
ORN IPSI	3524827	20	149	134	304	6.57895	49.0132	44.0789			51	40	5	99	51.5152	40.404	5.05051
ORN IPSI	4809552	26	121	149	298	8.72483	40.604	50			65	27	1	93	69.8925	29.0323	1.07527
ORN IPSI	4245110	36	101	157	297	12.1212	34.0067	52.862			46	43	3	92	50	46.7391	3.26087
ORN IPSI	4351587	32	101	171	305	10.4918	33.1148	56.0656			56	26	2	84	66.6667	30.9524	2.38095
ORN IPSI	66836	27	107	169	303	8.91089	35.3135	55.7756			53	23	2	78	67.9487	29.4872	2.5641
ORN IPSI	54364	20	132	136	288	6.94444	45.8333	47.2222			50	31	4	86	58.1395	36.0465	4.65116
ORN IPSI	1381108	34	127	126	288	11.8056	44.0972	43.75			47	36	2	86	54.6512	41.8605	2.32558
ORN IPSI	707650	21	139	125	285	7.36842	48.7719	43.8596			52	33	1	86	60.4651	38.3721	1.16279
ORN IPSI	16063668	26	99	165	290	8.96552	34.1379	56.8966			35	43	2	80	43.75	53.75	2.5
ORN IPSI	8140263	32	114	151	297	10.7744	38.3838	50.8418			41	26	1	69	59.4203	37.6812	1.44928
ORN IPSI	3746929	27	86	178	292	9.24658	29.4521	60.9589			41	29	3	73	56.1644	39.726	4.10959
ORN IPSI	2312796	25	137	127	290	8.62069	47.2414	43.7931			40	29	3	73	54.7945	39.726	4.10959
ORN IPSI	136730	31	124	129	284	10.9155	43.662	45.4225			46	25	2	75	61.3333	33.3333	2.66667
ORN IPSI	740473	44	90	150	294	14.966	30.6122	51.0204			37	26	2	65	56.9231	40	3.07692
ORN IPSI	948450	40	99	156	296	13.5135	33.4459	52.7027			35	24	3	62	56.4516	38.7097	4.83871
ORN IPSI	265878	26	107	135	268	9.70149	39.9254	50.3731			54	31	1	86	62.7907	36.0465	1.16279
ORN IPSI	115820	30	98	147	275	10.9091	35.6364	53.4545			45	27	6	78	57.6923	34.6154	7.69231
ORN IPSI	1352065	20	140	100	260	7.69231	53.8462	38.4615			55	37	1	93	59.1398	39.7849	1.07527
ORN IPSI	1452417	26	102	144	272	9.55882	37.5	52.9412			51	22	0	75	68	29.3333	0
ORN IPSI	1772983	26	120	118	264	9.84848	45.4545	44.697			49	30	1	82	59.7561	36.5854	1.21951
ORN IPSI	2315549	34	93	135	265	12.8302	35.0943	50.9434			39	35	1	75	52	46.6667	1.33333
ORN IPSI	2313125	23	82	151	258	8.91473	31.7829	58.5271			49	30	1	80	61.25	37.5	1.25
ORN IPSI	6782105	31	79	139	253	12.253	31.2253	54.9407			47	30	1	79	59.4937	37.9747	1.26582
ORN IPSI	136779	26	121	108	258	10.0775	46.8992	41.8605			38	28	1	69	55.0725	40.5797	1.44928
ORN IPSI	5443912	16	116	123	260	6.15385	44.6154	47.3077			44	19	1	67	65.6716	28.3582	1.49254
ORN IPSI	1433950	30	79	140	250	12	31.6	56			46	27	0	74	62.1622	36.4865	0
ORN IPSI	5912470	30	103	115	248	12.0968	41.5323	46.371			42	31	1	74	56.7568	41.8919	1.35135
ORN IPSI	1739805	24	109	120	253	9.48617	43.083	47.4308			41	18	6	65	63.0769	27.6923	9.23077
ORN IPSI	288994	12	98	140	251	4.78088	39.0438	55.7769			45	17	1	64	70.3125	26.5625	1.5625
ORN IPSI	473703	26	97	123	247	10.5263	39.2713	49.7976			42	22	3	68	61.7647	32.3529	4.41176
ORN IPSI	1731911	24	75	148	247	9.7166	30.3644	59.919			41	23	1	66	62.1212	34.8485	1.51515
ORN IPSI	475992	15	127	91	236	6.35593	53.8136	38.5593			35	26	3	65	53.8462	40	4.61538
ORN IPSI	2968278	25	107	101	234	10.6838	45.7265	43.1624			40	24	2	66	60.6061	36.3636	3.0303
ORN IPSI	6081320	29	96	96	222	13.0631	43.2432	43.2432			49	23	3	76	64.4737	30.2632	3.94737
ORN IPSI	155133	23	90	104	219	10.5023	41.0959	47.4886			47	20	0	67	70.1493	29.8507	0
ORN IPSI	6815707	20	104	109	237	8.43882	43.8819	45.9916			28	20	0	48	58.3333	41.6667	0
ORN IPSI	66245	29	71	134	234	12.3932	30.3419	57.265			29	20	0	50	58	40	0
ORN IPSI	871589	13	103	91	207	6.28019	49.7585	43.9614			35	24	1	60	58.3333	40	1.66667
ORN IPSI	24604910	23	78	90	191	12.0419	40.8377	47.1204			33	18	1	52	63.4615	34.6154	1.92308
ORN IPSI	1087533	15	85	88	192	7.8125	44.2708	45.8333			22	21	1	47	46.8085	44.6809	2.12766
ORN IPSI	979108	18	48	85	153	11.7647	31.3725	55.5556			37	20	0	58	63.7931	34.4828	0
ORN IPSI	1314176	12	80	51	145	8.27586	55.1724	35.1724			34	21	1	57	59.6491	36.8421	1.75439
ORN IPSI	41564188	17	58	89	164	10.3659	35.3659	54.2683			19	15	2	36	52.7778	41.6667	5.55556
n	51
mean		26.2353	108.275	131.922	267.804	9.80075	40.5441	49.1195			44.5098	28.0784	1.88235	75.3137	59.1217	37.2586	2.4832
MEDIAN		26	104	135	268	9.84848	40.604	48.1159			46	27	1	75	59.4203	37.6344	2.08333
ORN CONTRA	9961874	15	55	88	166	9.03614	33.1325	53.012			18	12	0	31	58.0645	38.7097	0
ORN CONTRA	10553378	20	44	76	142	14.0845	30.9859	53.5211			27	17	0	44	61.3636	38.6364	0
ORN CONTRA	4973726	9	48	89	153	5.88235	31.3725	58.1699			19	10	0	31	61.2903	32.2581	0
ORN CONTRA	4400670	10	51	86	149	6.71141	34.2282	57.7181			24	8	1	33	72.7273	24.2424	3.0303
ORN CONTRA	108635056	3	39	114	159	1.88679	24.5283	71.6981			17	4	0	22	77.2727	18.1818	0
ORN CONTRA	166957	20	37	88	145	13.7931	25.5172	60.6897			14	19	0	33	42.4242	57.5758	0
ORN CONTRA	3890568	15	36	91	143	10.4895	25.1748	63.6364			15	10	0	25	60	40	0
ORN CONTRA	17158343	16	35	84	136	11.7647	25.7353	61.7647			22	10	0	32	68.75	31.25	0
ORN CONTRA	794204	6	41	87	134	4.47761	30.597	64.9254			19	12	1	32	59.375	37.5	3.125
ORN CONTRA	1251132	8	49	84	141	5.67376	34.7518	59.5745			15	9	1	25	60	36	4
ORN CONTRA	27587193	7	40	81	133	5.26316	30.0752	60.9023			19	10	1	30	63.3333	33.3333	3.33333
ORN CONTRA	4502681	6	33	86	130	4.61538	25.3846	66.1538			12	13	2	29	41.3793	44.8276	6.89655
ORN CONTRA	26944289	8	52	63	127	6.29921	40.9449	49.6063			20	11	0	31	64.5161	35.4839	0
ORN CONTRA	6929056	17	31	78	127	13.3858	24.4094	61.4173			20	8	0	28	71.4286	28.5714	0
ORN CONTRA	6196258	21	45	59	126	16.6667	35.7143	46.8254			18	9	0	27	66.6667	33.3333	0
ORN CONTRA	474259	12	35	72	119	10.084	29.4118	60.5042			16	14	1	31	51.6129	45.1613	3.22581
ORN CONTRA	176547	23	32	65	120	19.1667	26.6667	54.1667			15	10	0	26	57.6923	38.4615	0
ORN CONTRA	265286	3	44	77	124	2.41935	35.4839	62.0968			13	8	1	22	59.0909	36.3636	4.54545
ORN CONTRA	3893613	8	37	67	118	6.77966	31.3559	56.7797			17	10	0	28	60.7143	35.7143	0
ORN CONTRA	29598135	5	31	82	118	4.23729	26.2712	69.4915			20	6	0	26	76.9231	23.0769	0
ORN CONTRA	473138	8	32	73	117	6.83761	27.3504	62.3932			10	10	0	21	47.619	47.619	0
ORN CONTRA	14276708	8	29	70	111	7.20721	26.1261	63.0631			14	11	1	27	51.8519	40.7407	3.7037
ORN CONTRA	26960808	13	33	66	113	11.5044	29.2035	58.4071			13	10	2	25	52	40	8
ORN CONTRA	27234223	11	32	71	115	9.56522	27.8261	61.7391			10	13	0	23	43.4783	56.5217	0
ORN CONTRA	501593	7	30	77	117	5.98291	25.641	65.812			15	5	0	20	75	25	0
ORN CONTRA	3769295	7	32	69	111	6.30631	28.8288	62.1622			9	16	1	26	34.6154	61.5385	3.84615
ORN CONTRA	4196806	12	35	64	111	10.8108	31.5315	57.6577			13	8	0	21	61.9048	38.0952	0
ORN CONTRA	41890238	12	23	68	103	11.6505	22.3301	66.0194			16	9	2	27	59.2593	33.3333	7.40741
ORN CONTRA	8890	7	22	71	103	6.79612	21.3592	68.932			16	9	0	26	61.5385	34.6154	0
ORN CONTRA	3779768	5	40	62	107	4.6729	37.3832	57.9439			12	7	2	21	57.1429	33.3333	9.52381
ORN CONTRA	1986834	12	22	67	102	11.7647	21.5686	65.6863			12	8	0	20	60	40	0
ORN CONTRA	30371795	6	23	69	103	5.82524	22.3301	66.9903			12	6	1	19	63.1579	31.5789	5.26316
ORN CONTRA	574767	13	34	50	97	13.4021	35.0515	51.5464			15	8	0	23	65.2174	34.7826	0
ORN CONTRA	3657410	17	25	58	100	17	25	58			14	5	0	19	73.6842	26.3158	0
ORN CONTRA	3758728	13	29	55	97	13.4021	29.8969	56.701			12	8	1	21	57.1429	38.0952	4.7619
ORN CONTRA	16687076	12	22	56	95	12.6316	23.1579	58.9474			12	9	0	21	57.1429	42.8571	0
ORN CONTRA	17986129	16	30	50	97	16.4948	30.9278	51.5464			11	7	0	19	57.8947	36.8421	0
ORN CONTRA	50002169	7	14	75	102	6.86275	13.7255	73.5294			8	5	0	13	61.5385	38.4615	0
ORN CONTRA	6761427	9	21	59	89	10.1124	23.5955	66.2921			13	11	0	24	54.1667	45.8333	0
ORN CONTRA	16786441	8	31	58	97	8.24742	31.9588	59.7938			11	5	0	16	68.75	31.25	0
ORN CONTRA	482257	9	25	49	84	10.7143	29.7619	58.3333			14	11	0	25	56	44	0
ORN CONTRA	473589	2	15	66	87	2.29885	17.2414	75.8621			14	4	0	18	77.7778	22.2222	0
ORN CONTRA	46720845	13	17	57	88	14.7727	19.3182	64.7727			9	7	0	17	52.9412	41.1765	0
ORN CONTRA	3974	5	20	56	81	6.17284	24.6914	69.1358			12	8	1	21	57.1429	38.0952	4.7619
ORN CONTRA	2312027	9	25	52	87	10.3448	28.7356	59.7701			8	6	0	15	53.3333	40	0
ORN CONTRA	4005938	8	21	47	85	9.41176	24.7059	55.2941			9	3	0	14	64.2857	21.4286	0
ORN CONTRA	34310811	13	21	37	71	18.3099	29.5775	52.1127			15	12	0	27	55.5556	44.4444	0
ORN CONTRA	334938	6	31	43	87	6.89655	35.6322	49.4253			6	3	0	9	66.6667	33.3333	0
ORN CONTRA	36	9	21	52	82	10.9756	25.6098	63.4146			8	3	2	13	61.5385	23.0769	15.3846
ORN CONTRA	34170033	6	16	48	71	8.4507	22.5352	67.6056			6	3	0	10	60	30	0
ORN CONTRA	21691874	1	26	42	69	1.44928	37.6812	60.8696			8	1	0	9	88.8889	11.1111	0
ORN CONTRA	17316692	28	30	9	67	41.791	44.7761	13.4328			1	6	0	7	14.2857	85.7143	0
ORN CONTRA	11215588	2	20	36	61	3.27869	32.7869	59.0164			6	6	0	12	50	50	0
ORN CONTRA	13211176	9	17	28	54	16.6667	31.4815	51.8519			7	3	0	10	70	30	0
ORN CONTRA	4532910	1	16	22	39	2.5641	41.0256	56.4103			9	7	0	16	56.25	43.75	0
ORN CONTRA	2190730	7	9	18	35	20	25.7143	51.4286			6	6	0	12	50	50	0
n	56
mean		10.0536	30.4286	63.6964	106.161	9.89093	28.7109	59.5456			13.3214	8.375	0.375	22.375	59.5071	37.3901	1.62159
MEDIAN		9	31	66	105	9.22395	28.7822	60.149			13	8	0	22.5	60	37.1711	0
