# Supplementary material for: The unique synaptic circuitry of specialized olfactory glomeruli in Drosophila melanogaster
Source: eLife. 2025 Oct 20;12:RP88824. doi: 10.7554/eLife.88824 (PMC12537010; doi:10.7554/eLife.88824)
Supplement: Figure 5—source data 1. — Synapse counts and synaptic strength of each connection type in the DA2, DL5, and VA1v glomerulus. Three pairwise comparisons are shown: DA2 vs. DL5 (top table), VA1v vs. DL5 (middle table), and VA1v vs. DA2 (bottom table). The relative synaptic strength (rel syn strength) of each connection type (listed on the left) and the relative differences (rel differences) (listed on the right) are color-coded. [file elife-88824-fig5-data1.xlsx]

## Sheet: final global circuitry
neuron class	connection motif	DA2	rel syn strength (%)	rel out classes (%)	rel in classes (%)	DL5	rel syn strength (%)	rel out classes (%)	rel in classes (%)	rel difference (%)	rel out difference (%)	rel in difference (%)
OSNs	OSNs>uPNs	2365	19.9848	49.4845	7.3686	2354	17.7607	43.4359	7.89196	12.5227	13.9253	-6.63154
	OSNs>MGNs	3186	26.9224			3201	24.1512			11.4745
	OSNs>OSNs	305	2.57732			202	1.52407			69.1079
uPNs	uPNs>OSNs	16	0.135204	10.9177	32.6179	26	0.196167	17.5041	28.0745	-31.0773	-37.628	16.1831
	uPNs>MGNs	1205	10.1825			2240	16.9006			-39.7504
	uPNs>uPNs	71	0.599966			54	0.407424			47.2584
MGNs	MGNs>OSNs	551	4.65608	39.5978	60.0135	818	6.17172	39.0599	64.0335	-24.5579	1.37702	-6.27793
	MGNs>uPNs	1424	12.0331			1313	9.90644			21.4677
	MGNs>MGNs	2711	22.9086			3046	22.9817			-0.318395
	SUM	11834	100	100	100	13254	100	100	100
neuron class	connection motif	VA1v	rel syn strength (%)	rel out classes (%)	rel in classes (%)	DL5	rel syn strength (%)	rel out classes (%)	rel in classes (%)	rel difference (%)	rel out difference (%)	rel in difference (%)
OSNs	OSNs>uPNs	7226	22.2633	59.8392	15.5098	2354	17.7607	43.4359	7.89196	25.3517	37.7642	96.526
	OSNs>MGNs	10295	31.7189			3201	24.1512			31.3346
	OSNs>OSNs	1901	5.85698			202	1.52407			284.299
uPNs	uPNs>OSNs	117	0.360477	6.83366	30.6744	26	0.196167	17.5041	28.0745	83.7601	-60.9598	9.26066
	uPNs>MGNs	1801	5.54888			2240	16.9006			-67.1675
	uPNs>uPNs	300	0.9243			54	0.407424			126.864
MGNs	MGNs>OSNs	3016	9.29229	33.3272	53.8158	818	6.17172	39.0599	64.0335	50.5624	-14.6768	-15.9568
	MGNs>uPNs	2430	7.48683			1313	9.90644			-24.4247
	MGNs>MGNs	5371	16.548			3046	22.9817			-27.9948
	SUM	32457	100	100	100	13254	100	100	100
neuron class	connection motif	VA1v	rel out (%)	rel out classes (%)	rel in classes (%)	DA2	rel out (%)	rel out classes (%)	rel in classes (%)	rel difference (%)	rel out difference (%)	rel in difference (%)
OSNs	OSNs>uPNs	7226	22.2633	59.8392	15.5098	2365	19.9848	49.4845	7.3686	11.4012	20.925	110.484
	OSNs>MGNs	10295	31.7189			3186	26.9224			17.8159
	OSNs>OSNs	1901	5.85698			305	2.57732			127.251
uPNs	uPNs>OSNs	117	0.360477	6.83366	30.6744	16	0.135204	10.9177	32.6179	166.618	-37.4075	-5.95823
	uPNs>MGNs	1801	5.54888			1205	10.1825			-45.5059
	uPNs>uPNs	300	0.9243			71	0.599966			54.0587
MGNs	MGNs>OSNs	3016	9.29229	33.3272	53.8158	551	4.65608	39.5978	60.0135	99.5735	-15.8357	-10.3272
	MGNs>uPNs	2430	7.48683			1424	12.0331			-37.7815
	MGNs>MGNs	5371	16.548			2711	22.9086			-27.7648
	SUM	32457	100	100	100	11834	100	100	100
color code	rel syn strength (%)	<5	5-10	10-15	15-20	>20
	rel difference (%)	<10	10-20	20-50	50-100	>100
