# Supplementary material for: The unique synaptic circuitry of specialized olfactory glomeruli in Drosophila melanogaster
Source: eLife. 2025 Oct 20;12:RP88824. doi: 10.7554/eLife.88824 (PMC12537010; doi:10.7554/eLife.88824)
Supplement: Figure 5—source data 2. [file elife-88824-fig5-data2.xlsx]

## Sheet: DA2
output	input	Freq	cell class output	cell class input	cell class input/total input		fractional output (%)			fractiona input (%)
A	B	2365	5856	872	7.36922	OSN-uPN	40.3859		uPN-OSN	1.83486
A	C	3186				OSN-MGN	54.4057		MGN-OSN	63.1881
A	A	305				OSN-OSN	5.20833		OSN-OSN	34.9771
B	B	70	1291	3859	32.6122	uPN-uPN	5.42215		uPN-uPN	1.81394
B	C	1205				uPN-MGN	93.3385		MGN-uPN	36.9008
B	A	16				uPN-OSN	1.23935		OSN-uPN	61.2853
C	B	1424	4686	7102	60.0186	MGN-uPNs	30.3884		MGN-MGN	38.1723
C	C	2711				MGN-MGNs	57.8532		uPN-MGN	16.9671
C	A	551				MGN-OSN	11.7584		OSN-MGN	44.8606
total input				11833
A	OSN
B	uPN
C	MGN

## Sheet: DL5
output	input	Freq	cell class output	cell class input	cell class input/total input		fractional output (%)			fractiona input (%)
A	B	2354	5757	1046	7.89017	OSN-uPN	40.8894		uPN-OSN	2.48566
A	C	3201				OSN-MGN	55.6019		MGN-OSN	78.2027
A	A	202				OSN-OSN	3.50877		OSN-OSN	19.3117
B	B	57	2323	3724	28.0908	uPN-uPN	2.45372		uPN-uPN	1.53061
B	C	2240				uPN-MGN	96.427		MGN-uPN	35.2578
B	A	26				uPN-OSN	1.11924		OSN-uPN	63.2116
C	B	1313	5177	8487	64.019	MGN-uPNs	25.3622		MGN-MGN	35.8902
C	C	3046				MGN-MGNs	58.8372		uPN-MGN	26.3933
C	A	818				MGN-OSN	15.8007		OSN-MGN	37.7165
total input				13257
A	OSN
B	uPN
C	MGN

## Sheet: VA1v
output	input	Freq	cell class output	cell class input	cell class input/total input		fractional output (%)			fractiona input (%)
A	B	7226	19422	5034	15.5098	OSN-uPN	37.2052		uPN-OSN	2.3242
A	C	10295				OSN-MGN	53.0069		MGN-OSN	59.9126
A	A	1901				OSN-OSN	9.78787		OSN-OSN	37.7632
B	B	300	2218	9956	30.6744	uPN-uPN	13.5257		uPN-uPN	3.01326
B	C	1801				uPN-MGN	81.1993		MGN-uPN	24.4074
B	A	117				uPN-OSN	5.27502		OSN-uPN	72.5793
C	B	2430	10817	17467	53.8158	MGN-uPNs	22.4646		MGN-MGN	30.7494
C	C	5371				MGN-MGNs	49.6533		uPN-MGN	10.3109
C	A	3016				MGN-OSN	27.882		OSN-MGN	58.9397
total input				32457
A	OSN
B	uPN
C	MGN
