# Supplementary material for: The unique synaptic circuitry of specialized olfactory glomeruli in Drosophila melanogaster
Source: eLife. 2025 Oct 20;12:RP88824. doi: 10.7554/eLife.88824 (PMC12537010; doi:10.7554/eLife.88824)
Supplement: Figure 5—source data 3. [file elife-88824-fig5-data3.xlsx]

## Sheet: Sheet1
		OSNs																																												uPNs
	DA2	OSN#1	OSN#2	OSN#3	OSN#4	OSN#5	OSN#6	OSN#7	OSN#8	OSN#9	OSN#10	OSN#11	OSN#12	OSN#13	OSN#14	OSN#15	OSN#16	OSN#17	OSN#18	OSN#19	OSN#20	OSN#21	OSN#22	OSN#23	OSN#24	OSN#25	OSN#26	OSN#27	OSN#28	OSN#29	OSN#30	OSN#31	OSN#32	OSN#33	OSN#34	OSN#35	OSN#36	OSN#37	OSN#38	OSN#39	OSN#40	OSN#41	OSN#42	OSN#43	OSN#44	PN#1	PN#2	PN#3	PN#4
OSNs	OSN#1			1	1	1		1	2	4							1		1				1	1			1			1		1												1		32	22	6	8
	OSN#2	1		2									3						1	1	4				1			1				2		1		1										30	25	10	12
	OSN#3		1					1	2	1	1		1			1		1			1		1		2	1																				32	18	13	9
	OSN#4													1															1			1														24	13	12	6
	OSN#5									1										1										1					1											10	17	1	6
	OSN#6					1			1		1		2				2							1				1	1						1											37	7	6	12
	OSN#7																										1	1								1										12	26	7	7
	OSN#8	1		2	1						1		1		1	1	2		2						1					1						1			1	1						28	25	13	3
	OSN#9	1		2									2								2				3			1				3	1			1			1							31	28	14	10
	OSN#10	4	1			1			1												1			1											1											36	6	15	6
	OSN#11			1				1											2																											21	19	8	3
	OSN#12		3	1			1		1		1	1			1	1														1		1	1		1		1					1				25	22	11	6
	OSN#13					1							1			1			1						1				1																	19	16	9	3
	OSN#14	2											1				2																													22	20	1	17
	OSN#15								2	1	1		1																												2					15	9	5	3
	OSN#16	2		1			2				2			1								1		2		1		1								1								1		39	21	9	13
	OSN#17								1																																					22	18	4	1
	OSN#18	1	1						2	1																		1																		17	17	13	2
	OSN#19																									1				1	1															21	17	3	1
	OSN#20			1							2			2	1											1			1																	30	16	5	10
	OSN#21	1			1																				1								1													11	11	8	1
	OSN#22							1					1							1			1		1						1						1									15	21	5	9
	OSN#23				1	1											1												1																	19	15	15	5
	OSN#24	1	1	1				1		2			2					1			1	1					1			1				1			2									20	29	6	12
	OSN#25					1											1	2																					1		1					21	19	9	5
	OSN#26		1					1	1											1																	1									22	11	2	8
	OSN#27	1	1	1			2							1										2																		1				22	16	4	10
	OSN#28	1							1													1					1				2															29	10	8	6
	OSN#29	1				1			1				1							1					1	1																				24	14	10	8
	OSN#30																			1	1	1																								14	13	1	4
	OSN#31		1		1		1			2	2					1			1					2										1												10	16	11	6
	OSN#32			1									1		1	1			1				1						1																	23	11	6	8
	OSN#33													1					1	1				1								1														8	17	7	7
	OSN#34					1																																								10	9	1	3
	OSN#35		2			1			1								1		1							1																				17	15	5	6
	OSN#36																											1	1																	10	6	4	1
	OSN#37																																													7	1		5
	OSN#38								1	1																															1					16	8		3
	OSN#39																			1							1						1													13	4	8	2
	OSN#40																			1																										10	4		1
	OSN#41												2										3									1														8	4	4	3
	OSN#42																																														1
	OSN#43																																													1	3	1
	OSN#44																																													2	3
uPNs	PN#1											1																																		7	9	2	3
	PN#2				2		2						2			2						1				1						1					2	1								12	7	3	3
	PN#3																																													5		2
	PN#4																																													1			2
	PN#5																																													1	3
	PN#6																																													1
	PN#7																																													2	1	1
MGNs	MGN#1					1	1	1				1	2	1				1		1			3		3			1	2				2													3	3
	MGN#2	1	3	1			1			1	1			2				1			1		1			1		1								1										46	21	24	12
	MGN#3	1	6		1	1		1	4	3	1	1			3	1		2	2		1		1	2	3	1	2	1		3	1		1		1						1					15	15	2	7
	MGN#4
	MGN#5
	MGN#6										1																																			8	4	4	1
	MGN#7
	MGN#8	1	1						4									1					1	1				1			1	1		1		1	1									5	10	2	5
	MGN#9								1		1																						1													31	25	10	7
	MGN#10					1				1							1																						1							15	6	1	3
	MGN#11						1																																							33	16	9	15
	MGN#12		5	3	4	4	1	2	2	3	4	1	1	2	1	2	5	2	2	2	5	4	1	2	1	4	2	3	2	1	1	2	3	2	1		2		1	1		1				19	6	3	3
	MGN#13			1			1	1							1	1		1		1	3	1	1	1		1							2		1											6	4	2	1
	MGN#14																																													1	1
	MGN#15																																													2	3		1
	MGN#16																												1																		1	1
	MGN#17									1			1				2								2					1																17	24	12	2
	MGN#18	4	2					1	1	1	4			1					2		1		1		2		1			1			1	1												6	3	1
	MGN#19		1			1					1							1																1	1					1						11	8	4
	MGN#20						1																											1												5	5	5	4
	MGN#21	1		1			1	1	1	2	1						1		2	1	1				2		1		1	1	1			4		2	2		2		1	2				4		2	2
	MGN#22	1	1	1					1	2						1	1															1														11	9	10	1
	MGN#23			1																																										31	21	6	8
	MGN#24	2		4	2	1	1	2	1	1	1	1	6		3	2		1		1	1	1		1					1	3	1			1						3						7	2	10
	MGN#25						1				1			1														1										1								1
	MGN#26				1			1		2		1							1							1								1												7	4	1	3
	MGN#27													1																																9	2	2	2
	MGN#28																																													1
	MGN#29	2			2	2	2	4		2		1	3		1	1		2		3	1	2		2	3		1	1	1		1				2			1		1	1		1	1		1	3	1
	MGN#30																																													16	13		6
	MGN#31										1			1			1		2													2														1
	MGN#32																																													3	2	1	1
	MGN#33	1	1				2	1							2			2			1				1	1			1				1		1			1	1							4	3		3
	MGN#34											1													1		1	1																		1	4
	MGN#35																																													3	1	1	1
	MGN#36														1											2			1																	11	7	2	1
	MGN#37																																			1										9	1
	MGN#38																																													4	1		1
	MGN#39																																													6	2	3	1
	MGN#40																																													6	3	4	1
	MGN#41
	MGN#42																															1														6	5	6	2
	MGN#43						1																																						1		1
	MGN#44						1											1							1				1					1					1				1			7	5	3
	MGN#45				1											1																														4	8	1
	MGN#46
	MGN#47																																													3	3		2
	MGN#48																	1					1		1									2		1										1			1
	MGN#49
	MGN#50																																													3	4		1
	MGN#51
	MGN#53
	MGN#54									1		1						1														2														2	5
	MGN#55	1		2	1		1		1	2							1		1		1				1								1			2			1							4	1
	MGN#56																																													3
	MGN#57	1		2					1							1							1				1					2							1	1						1	3	2	1
	MGN#58																																													1
	MGN#59																					1																								2	3	1	1
	MGN#60																							1																						7	9	10	1
	MGN#61																																													8	9	1	3
	MGN#62																																													1	6	3
	MGN#63
	MGN#64
	MGN#65
	MGN#66																																														1	2
	MGN#67																																		1			1									2
	MGN#68
	MGN#69																																													2	2	1
	MGN#70
	MGN#71																																													3	1	2
	MGN#72
	MGN#73			1								1													1	1											1									4	1	1
	MGN#74																																													2
	MGN#75																																													13	6	1	2
	MGN#76																																													1			1
	MGN#77
	MGN#78				1	1	2		1	1					1						1																1									4	5	2
	MGN#79		1	1	1														1							1			1			1														1	1
	MGN#80
	MGN#81											1																																		3		1
	MGN#82																																													3
	MGN#83			1														1													1															4	5	6
	MGN#84	1																																												12	4	4	6
	MGN#85																																													1	3
	MGN#86																																													1
	MGN#87				1																																									3		2
	MGN#88						1																																							1	2
	MGN#89
	MGN#90																																													1	3
	MGN#91
	MGN#92
	MGN#93																		1																											1	1
	MGN#94																																														1
	MGN#95																																													1	1
	MGN#96
	MGN#97
	MGN#98																																													1
	MGN#99																																	1												6	1	2
	MGN#100									1	1				1		2	1								1																					1		2
	MGN#101
	MGN#102
	MGN#103																				1																									1	2		4
	MGN#106
	MGN#107
	MGN#108																																													1		2
	MGN#109
	MGN#110																																													6	4		5
	MGN#111				1
	MGN#112	1
	MGN#113																																													3	1
	MGN#114
	MGN#115
	MGN#116
	MGN#117
	MGN#118	1	2			1	1		1					1										3		1			1								1		1							3	2	2
	MGN#119		1										1																																	1	1		1
	MGN#120
	MGN#121																																													1		1	2
	MGN#122
	MGN#124																																													4	3		1
	MGN#125
	MGN#126
	MGN#127																																						1							1
	MGN#128
	MGN#130																																													3	2		1
	MGN#131																																													4
	MGN#132
	MGN#133				1															1										1
	MGN#134																																														1
	MGN#135
	MGN#136
	MGN#137
	MGN#138																																													1	1
	MGN#139
	MGN#140																	1																											1	1	1
	MGN#141
	MGN#142
	MGN#143
	MGN#144																																														1	1
	MGN#146
	MGN#147
	MGN#148
	MGN#149
	MGN#150																																													1	1
	MGN#151																																														1
	MGN#152																																													1
	MGN#153
	MGN#154
	MGN#155
	MGN#156
	MGN#158																																														4	1
	MGN#160								1																							1				1										2	1	5
	MGN#161
	MGN#162
	MGN#164																																													1		1
	MGN#165																																													2	1		2
	MGN#166														1																															2			1
	MGN#167		1							1
	MGN#168
	MGN#169
	MGN#170
	MGN#171
	MGN#172
	MGN#173
	MGN#174
	MGN#175
	MGN#177
	MGN#178
	MGN#180
	MGN#181
	MGN#182																																														1		1
	MGN#183
	MGN#184
	MGN#185
	MGN#186
	MGN#187																																													1	1
	MGN#188											1																																		2
	MGN#189
	MGN#191					1																																								3	3	3
	MGN#193
	MGN#195																																										1
[truncated: 184 more columns]
