# Supplementary material for: The unique synaptic circuitry of specialized olfactory glomeruli in Drosophila melanogaster
Source: eLife. 2025 Oct 20;12:RP88824. doi: 10.7554/eLife.88824 (PMC12537010; doi:10.7554/eLife.88824)
Supplement: Figure 5—source data 4. [file elife-88824-fig5-data4.xlsx]

## Sheet: Sheet1
		OSNs																																														uPN	MGNs
	DL5	OSN#1	OSN#2	OSN#3	OSN#4	OSN#5	OSN#6	OSN#7	OSN#8	OSN#9	OSN#10	OSN#11	OSN#12	OSN#13	OSN#14	OSN#15	OSN#16	OSN#17	OSN#18	OSN#19	OSN#20	OSN#21	OSN#22	OSN#23	OSN#24	OSN#25	OSN#26	OSN#27	OSN#28	OSN#29	OSN#30	OSN#31	OSN#32	OSN#33	OSN#34	OSN#35	OSN#36	OSN#37	OSN#38	OSN#39	OSN#40	OSN#41	OSN#42	OSN#43	OSN#44	OSN#45	OSN#46	PN#1	MGN#1
OSNs	OSN#1									3														1													2			1								62	3
	OSN#2					2		1		1	1					5									1	1			1	1																		120	2
	OSN#3					1			1	1		1		1		1		1							1																	1						83	5
	OSN#4					1				1	1							1											1	1													1					100	6
	OSN#5							1							1	1															1																	37	2
	OSN#6		1												2																																	54	6
	OSN#7		1							1	1	1			1					1					1								2				2		1									115	5
	OSN#8			1																																												50	3
	OSN#9	6		2				1			1					1		2	1													1								1								105	1
	OSN#10		1			4				1		1						1					1																									85	2
	OSN#11		1	1																																												21
	OSN#12					1		1																	1																							72	7
	OSN#13			1						1			1																																			67	6
	OSN#14					1												1																														70	9
	OSN#15		2	1						1									2											2																		84	2
	OSN#16					1		1												1																	1											48	5
	OSN#17	1		1	1																	1	1		1																							54
	OSN#18																	2		1					1				1	1																		59
	OSN#19					1	1						1				1							1				1																1				58	5
	OSN#20			1																																												44	2
	OSN#21												1					1																														58	2
	OSN#22	1									1							1			1	1																										46	4
	OSN#23		1		1																																											35	2
	OSN#24		1	2	1			1		2		1			1														2													1						72	1
	OSN#25															3								1				1			1		1		1													44
	OSN#26																																1		1													45	10
	OSN#27										1									1							1			1																		51	3
	OSN#28	1	1		1			1		2						1		1	1					1	1											1	3											60	2
	OSN#29			1												1											1									1												36	4
	OSN#30		1																																													41	3
	OSN#31																																															23	3
	OSN#32	1																																														32
	OSN#33																																															29	1
	OSN#34																																															33	1
	OSN#35							1																																								36	1
	OSN#36	1					1					1							1										1	1																		50	1
	OSN#37				1									1																																		28	2
	OSN#38	1						5	1		1	1													1																							88	1
	OSN#39																													1																		30	1
	OSN#40			1	1																																											14
	OSN#41		1																																				1								1	34	1
	OSN#42					1				1								2																														42
	OSN#43											1							1																													14
	OSN#44																																															26	1
	OSN#45																																															5
	OSN#46																																															2	1
uPN	PN#1	1	1	4		2	1	2		2			1	3			1			2				1		2	1		1	1																		54	155
MGNs	MGN#1	1	3	2	5	2		3			2		1	2	2	6		1	4		1			1	2		3	2	3	4	1					1	3					2						133	1
	MGN#2							1								1														1																		24	1
	MGN#3	3	1	1	2		4		2	2			1	1	3	1		2		2				2	1	2	3			1	1		1	2	1													34	14
	MGN#4				1			1							1										1				1								1											28	11
	MGN#5	6	2	1	4	3		4		7	7	1	1	1	1	1	1	2	4	1	4	1	1			1	1	2	2	1	2	1		1	1	4	1			3		2		1				63	6
	MGN#6
	MGN#7																		1																													14
	MGN#8																																															3
	MGN#9	1	2		1	3	3	1	3		2	1	1	2		1	1				2		2	3	1		1				1		2	1	1		1	2	1	1		1	1		2			39	10
	MGN#10																																													1		9
	MGN#11					1	1		1				1	2													1							1				1										14	2
	MGN#12
	MGN#13	2	1	3	3	2	2	3	1	3	3	1	4	6	4	2	1	6		1	4	1	3	4	1	2	5	5	1	3	6	2	2	1	1	2	3	1	2		1	1	2	2				23	15
	MGN#14
	MGN#15	4			2		1	1	1	1			1					3	2		1	3			1				1								2	1	3	1			1					22
	MGN#16																																															3	1
	MGN#17	1	1	1		4	1				1	1						1	2			1					1	1					1			1						3						19	1
	MGN#18				1										1																		1															20	6
	MGN#19	2				1	1	1	1	1	1	2	1		1					1	2						1	1			1						1		1	1	1				3			18	4
	MGN#20
	MGN#21				1		1																		2									1														57	4
	MGN#23																																															16
	MGN#24	4		1	1		1			2		3	2	1	1			1	1	3			2	1		1	1					2	1	2		1								1				14	3
	MGN#25																								1																							18	1
	MGN#26		2					1		1		2			1																																	42	1
	MGN#27	1	1											1																																		10	7
	MGN#29										1	1		1	1																																	21	4
	MGN#30									1			2	1	1						1			1	1										1													19	1
	MGN#31		1			1	1			1	1			1						1	1			1	1		1																					5	2
	MGN#32			1		1	1	1			2																																					14	1
	MGN#33								1		1						1																															4	1
	MGN#34																																															16
	MGN#35		4	1		1	1			1		1		1	2	2	1							1	3	1			2				1		1	1										1		15
	MGN#36		1					1																		1							1															10	1
	MGN#37																																												1			14	1
	MGN#38																																															9
	MGN#39		1															1				1																					1					15	1
	MGN#40												1																																			9	1
	MGN#41																																															3
	MGN#42					1	1	1					1	2						1			2	2			1					1								1								35
	MGN#43							1																	1								1				1				1							6
	MGN#44		1	1	1			1	1		2	1	1			1											2		2							3			1	1								14	1
	MGN#45																1																															20	1
	MGN#46																																															1	1
	MGN#47																																1															8
	MGN#48																																															14	1
	MGN#49			2			2	2					1				1				1		1		2				1								1											3	2
	MGN#50					1																														1												2
	MGN#51																																															8
	MGN#52											1			1				1	1			1					1		1					1									1				9	1
	MGN#53
	MGN#54								1																																							9
	MGN#55																																															10
	MGN#56									1																							1				1											3	1
	MGN#57								1	2						2			1	2						1								1														1
	MGN#58																																																1
	MGN#59																																		1													3
	MGN#60				1			1		1																	1					1																3
	MGN#61																																															5	3
	MGN#62			1						1																										1						1						11	2
	MGN#63											1																							1													10	1
	MGN#64																																															11
	MGN#65			1																1											1		1					1										6
	MGN#66																																															10	2
	MGN#67																																															7
	MGN#68																																															1
	MGN#69
	MGN#70																																															6
	MGN#71																																															12	1
	MGN#72																																															5
	MGN#73																																															7	1
	MGN#74
	MGN#75
	MGN#76					1																1																										5
	MGN#77									1				1			1				1																											12
	MGN#78			1	2			1								2	1				1						1	1	2						1				2			1						4	1
	MGN#79																																															4
	MGN#80											1																																				7
	MGN#81
	MGN#82
	MGN#83																																				1											4
	MGN#84					1																					1																					10
	MGN#85																																															4
	MGN#86			1												2											1	2		1												1						5	5
	MGN#87																1																															9
	MGN#88							1					1		1																	1						1								1		4
	MGN#90																																															5
	MGN#91																																															1
	MGN#92																																															6
	MGN#93								1						1									1																								10
	MGN#94																																									1						3
	MGN#95		1	1						1																					1		1															4
	MGN#96																																															7
	MGN#97
	MGN#98																																															2	1
	MGN#99
	MGN#100																																															4
	MGN#101
	MGN#102
	MGN#103
	MGN#105														1		1																									1						1	1
	MGN#106
	MGN#107				1	1	1		2	2			1		1	1	1		1								3	1	1			1			1			1							1		1	3	2
	MGN#108	1				1							1	1				3	1	1	1		4	1												1		1										2	3
	MGN#109		1																		1				2														1									1
	MGN#110																																															4
	MGN#111
	MGN#112																																															18	1
	MGN#114																																															1
	MGN#115																																															7	1
	MGN#116			1																																												5	9
	MGN#117																																															4
	MGN#118																																															3
	MGN#119
	MGN#120								1																																							2
	MGN#121
	MGN#122
	MGN#123																																															6
	MGN#124																																															1
	MGN#125																																	1														8
	MGN#126															1												1																				4	2
	MGN#127
	MGN#128																			1			1																					1				1
	MGN#129
	MGN#130		1																																													4
	MGN#131																																															5
	MGN#132																																															6	1
	MGN#135																1																															2
	MGN#137																																								1							1
	MGN#138
	MGN#139
	MGN#140																																															2
	MGN#141
	MGN#142					1		1					1		1												1		1	1	1	2						1										1
	MGN#143							1																																								6
	MGN#144
	MGN#145																																															1	1
	MGN#147
	MGN#148	1																																														7	1
	MGN#149
	MGN#150																																															1	1
	MGN#151		1								1				1		1			2				1					1	1					2	1													1
	MGN#152																																															2
	MGN#153																																															1	1
	MGN#154																	1																														2	1
	MGN#155																																															6
	MGN#156								1					1			1				1																						1					11
	MGN#157
	MGN#158
	MGN#159														1																																	3
	MGN#160								2				1					2	1			2			1				1																			3
	MGN#162	1																														1																3
	MGN#163																																															5
	MGN#165																																															10
	MGN#166
	MGN#167																1																		2													3
	MGN#168																																															5
	MGN#169																																															3
	MGN#170																																															4
	MGN#171																																															8	4
	MGN#172																																															4
	MGN#173									1																											1
	MGN#174																																															5
	MGN#175																																															3
	MGN#176																																															1
	MGN#177
	MGN#178																																															1
	MGN#179	1																																														2
	MGN#180																																															2
	MGN#181
	MGN#182
	MGN#183										1										2																	1
	MGN#184
	MGN#185																																															1
	MGN#186	1																	2																													17
	MGN#187																																			1												13	1
	MGN#188
	MGN#189
	MGN#190																																															3
	MGN#191																																															2
	MGN#192
	MGN#193															2																																3
	MGN#194
	MGN#195																		1			1																										6
	MGN#197
	MGN#198		1																															1										1				1
	MGN#199
	MGN#200
	MGN#202																																															2
	MGN#203														1
	MGN#204				2								1		1					1
	MGN#205								1													1															1											7
	MGN#206
	MGN#207																																															1	1
	MGN#208																																															1
	MGN#209
	MGN#210
	MGN#211																																															1
	MGN#212					1
	MGN#213																																															2
	MGN#215																																															5
	MGN#216																																															1
	MGN#217
	MGN#218																																															2	15
	MGN#219
	MGN#220
	MGN#221		1										1																					1														2
	MGN#222																																																1
	MGN#223																																															2
	MGN#224																																															1
	MGN#225																																															4
	MGN#226																																															1
	MGN#227																																																1
	MGN#228																																															3
	MGN#229					1																						1
	MGN#230
	MGN#231																																											1				1
	MGN#232
	MGN#233
	MGN#234																																																1
	MGN#235																																			1	1											5
	MGN#236																																															6
	MGN#237																																															1
	MGN#238
[truncated: 223 more columns]
