# Supplementary material for: The unique synaptic circuitry of specialized olfactory glomeruli in Drosophila melanogaster
Source: eLife. 2025 Oct 20;12:RP88824. doi: 10.7554/eLife.88824 (PMC12537010; doi:10.7554/eLife.88824)
Supplement: Supplementary file 1. — The table lists the relative differences between DA2 and DL5 (see Methods for calculations). Values that are at least 20% greater in DA2 than in DL5 are highlighted in dark shades and values that are at least 20% less in DA2 than in DL5 are highlighted in light shades. [file elife-88824-supp1.xlsx]

## Sheet: Sheet1
Row	Values	Unit	OSNs	uPNs	MGNs	all
			relative differences
1	Total neuronal length	µm	-26.1987	-7.23407	-25.7171	-21.5921
2	Total synaptic counts	inputs	-19.8523	-1.71934	-19.8381	-14.741
3		outputs	-2.29936	-47.7477	-16.1505	-16.368
4		T-bars	-12.366	-46.5116	-19.6565	-21.8187
5	Total innervation density (sum of length of all neuronal fibers/glomerular volume)	µm/µm^3	19.9272	50.7446	20.7097	27.4128
6	Total glomerular synaptic density (total synaptic counts/glomerular volume)	inputs/µm^3	30.2401	59.7061	30.2631	38.5458
7		outputs/µm^3	58.7635	-15.0901	36.2554	35.902
8		T-bars/µm^3	42.4052	-13.0814	30.5582	27.0446
9	Neuronal synaptic density (synaptic counts/neuronal length)	inputs/µm	8.4415	4.92796	4.89574	5.62544
10		outputs/µm	28.6557	-47.3299	1.96287	21.2282
11		T-bars/µm	15.7948	-45.0929	-5.40739	7.44481
12	Synaptic ratio	T-bars/inputs	2.61181	-47.3126	-6.08427	2.25626
13		outputs/inputs	13.7705	-49.6777	-5.99283	10.7971
14	Polyadicity	outputs/T-bars	11.3408	-4.03198	22.5357	21.2916
