# Supplementary material for: The unique synaptic circuitry of specialized olfactory glomeruli in Drosophila melanogaster
Source: eLife. 2025 Oct 20;12:RP88824. doi: 10.7554/eLife.88824 (PMC12537010; doi:10.7554/eLife.88824)
Supplement: Table 1—source data 1. [file elife-88824-table1-data1.xlsx]

## Sheet: OSNs
DA2
	Skeleton	length	input	output	T-bar	inputs/length (µm)	outputs/length (µm)	T-bars/length (µm)	innervation density	input/µm^3	output/µm^3	T-bar/µm^3	polyadicity	T-bar/post	outputs/post
	21783	67.266	24	188	26	0.356792	2.79487	0.386525	0.0420413	0.015	0.1175	0.01625	7.23077	1.08333	7.83333
	25146	49.729	33	229	40	0.663597	4.60496	0.80436	0.0310806	0.020625	0.143125	0.025	5.725	1.21212	6.93939
	48162	33.455	14	162	22	0.418473	4.84233	0.6576	0.0209094	0.00875	0.10125	0.01375	7.36364	1.57143	11.5714
	82695	36.76	16	172	24	0.435256	4.679	0.652884	0.022975	0.01	0.1075	0.015	7.16667	1.5	10.75
	73054	42.831	11	110	17	0.256823	2.56823	0.396909	0.0267694	0.006875	0.06875	0.010625	6.47059	1.54545	10
	17280	48.36	22	186	31	0.454921	3.84615	0.641026	0.030225	0.01375	0.11625	0.019375	6	1.40909	8.45455
	74281	25.94	6	52	9	0.231303	2.00463	0.346955	0.0162125	0.00375	0.0325	0.005625	5.77778	1.5	8.66667
	21005	48.828	14	167	23	0.286721	3.42017	0.471041	0.0305175	0.00875	0.104375	0.014375	7.26087	1.64286	11.9286
	1681	46.158	22	183	29	0.476624	3.96464	0.628277	0.0288487	0.01375	0.114375	0.018125	6.31034	1.31818	8.31818
	58623	46.336	14	126	21	0.302141	2.71927	0.453211	0.02896	0.00875	0.07875	0.013125	6	1.5	9
	81059	29.5	16	60	11	0.542373	2.0339	0.372881	0.0184375	0.01	0.0375	0.006875	5.45455	0.6875	3.75
	26537	19.324	8	124	14	0.413993	6.41689	0.724488	0.0120775	0.005	0.0775	0.00875	8.85714	1.75	15.5
	71286	54.771	19	148	23	0.346899	2.70216	0.41993	0.0342319	0.011875	0.0925	0.014375	6.43478	1.21053	7.78947
	90071	60.197	36	179	34	0.598036	2.97357	0.564812	0.0376231	0.0225	0.111875	0.02125	5.26471	0.944444	4.97222
	87466	61.638	37	223	40	0.600279	3.6179	0.64895	0.0385237	0.023125	0.139375	0.025	5.575	1.08108	6.02703
	87395	58.623	16	144	23	0.27293	2.45637	0.392337	0.0366394	0.01	0.09	0.014375	6.26087	1.4375	9
	87475	63.832	28	181	33	0.438651	2.83557	0.516982	0.039895	0.0175	0.113125	0.020625	5.48485	1.17857	6.46429
	100279	45.036	23	150	23	0.510703	3.33067	0.510703	0.0281475	0.014375	0.09375	0.014375	6.52174	1	6.52174
	101529	17.847	7	61	10	0.392223	3.41794	0.560318	0.0111544	0.004375	0.038125	0.00625	6.1	1.42857	8.71429
	101554	23.355	12	75	13	0.513809	3.2113	0.556626	0.0145969	0.0075	0.046875	0.008125	5.76923	1.08333	6.25
	21319	53.227	18	135	19	0.338174	2.53631	0.356962	0.0332669	0.01125	0.084375	0.011875	7.10526	1.05556	7.5
	10388	63.67	23	131	21	0.361238	2.05748	0.329826	0.0397938	0.014375	0.081875	0.013125	6.2381	0.913043	5.69565
	52419	56.534	21	177	23	0.371458	3.13086	0.406835	0.0353337	0.013125	0.110625	0.014375	7.69565	1.09524	8.42857
	51635	61.325	38	256	47	0.619649	4.17448	0.766408	0.0383281	0.02375	0.16	0.029375	5.44681	1.23684	6.73684
	32870	46.588	18	168	24	0.386366	3.60608	0.515154	0.0291175	0.01125	0.105	0.015	7	1.33333	9.33333
	82671	12.401	3	30	6	0.241916	2.41916	0.483832	0.00775062	0.001875	0.01875	0.00375	5	2	10
	83809	34.387	12	104	17	0.348969	3.0244	0.494373	0.0214919	0.0075	0.065	0.010625	6.11765	1.41667	8.66667
	82413	39.13	24	203	26	0.61334	5.18784	0.664452	0.0244563	0.015	0.126875	0.01625	7.80769	1.08333	8.45833
	81915	72.659	37	227	41	0.509228	3.12418	0.56428	0.0454119	0.023125	0.141875	0.025625	5.53659	1.10811	6.13514
	92342	13.628	5	52	8	0.366892	3.81567	0.587027	0.0085175	0.003125	0.0325	0.005	6.5	1.6	10.4
	9149	9.82	4	30	7	0.407332	3.05499	0.712831	0.0061375	0.0025	0.01875	0.004375	4.28571	1.75	7.5
	71797	42.345	17	146	23	0.401464	3.44787	0.543157	0.0264656	0.010625	0.09125	0.014375	6.34783	1.35294	8.58824
	81927	48.586	19	192	25	0.391059	3.95176	0.514552	0.0303662	0.011875	0.12	0.015625	7.68	1.31579	10.1053
	78159	67.853	33	242	42	0.486345	3.56653	0.618985	0.0424081	0.020625	0.15125	0.02625	5.7619	1.27273	7.33333
	87538	51.35	28	220	32	0.545278	4.28432	0.623174	0.0320938	0.0175	0.1375	0.02	6.875	1.14286	7.85714
	89169	46.804	17	183	24	0.363217	3.90992	0.512777	0.0292525	0.010625	0.114375	0.015	7.625	1.41176	10.7647
	94347	84.67	36	208	41	0.42518	2.4566	0.484233	0.0529188	0.0225	0.13	0.025625	5.07317	1.13889	5.77778
	94292	55.105	24	153	25	0.435532	2.77652	0.453679	0.0344406	0.015	0.095625	0.015625	6.12	1.04167	6.375
	11624	59.311	29	194	35	0.488948	3.27089	0.59011	0.0370694	0.018125	0.12125	0.021875	5.54286	1.2069	6.68966
	101606	61.538	14	144	25	0.227502	2.34002	0.406253	0.0384612	0.00875	0.09	0.015625	5.76	1.78571	10.2857
	271424	7.408	2	21	3	0.269978	2.83477	0.404968	0.00463	0.00125	0.013125	0.001875	7	1.5	10.5
	22870	55.438	24	212	35	0.432916	3.82409	0.631336	0.0346487	0.015	0.1325	0.021875	6.05714	1.45833	8.83333
	47700	52.818	25	202	31	0.473323	3.82445	0.586921	0.0330112	0.015625	0.12625	0.019375	6.51613	1.24	8.08
	48086	35.92	19	121	17	0.528953	3.3686	0.473274	0.02245	0.011875	0.075625	0.010625	7.11765	0.894737	6.36842
n	44
SUM		2012.3	868	6671	1063	18.5468	148.428	23.4322	1.25769	0.5425	4.16937	0.664375
mean		45.7341	19.7273	151.614	24.1591	0.421518	3.37337	0.53255	0.0285838	0.0123295	0.0947585	0.0150994	6.34633	1.30542	8.29237
STDV						0.11088	0.895258	0.117906	0.0111811	0.00610793	0.0381111	0.00666083	0.898838	0.269874	2.13339
SEM						0.0167157	0.134965	0.017775	0.00168562	0.000920804	0.00574547	0.00100416	0.135505	0.040685	0.32162
DL5
	Skeleton	length	input	output	T-bar	inputs/length (µm)	outputs/length (µm)	T-bars/length (µm)	innervation density	input/µm^3	output/µm^3	T-bar/µm^3	poliadicity	T-bar/post	outputs/post
	244762	10.398	2	19	2	0.192345	1.82727	0.192345	0.00399923	0.000769231	0.00730769	0.000769231	9.5	1	9.5
	113539	29.213	10	123	15	0.342313	4.21045	0.51347	0.0112358	0.00384615	0.0473077	0.00576923	8.2	1.5	12.3
	132035	84.168	33	167	34	0.392073	1.98413	0.403954	0.0323723	0.0126923	0.0642308	0.0130769	4.91176	1.0303	5.06061
	134760	65.72	14	106	24	0.213025	1.6129	0.365186	0.0252769	0.00538462	0.0407692	0.00923077	4.41667	1.71429	7.57143
	134815	100.132	40	255	52	0.399473	2.54664	0.519315	0.0385123	0.0153846	0.0980769	0.02	4.90385	1.3	6.375
	232945	77.107	34	263	41	0.440946	3.41084	0.531729	0.0296565	0.0130769	0.101154	0.0157692	6.41463	1.20588	7.73529
	134998	86.447	47	222	47	0.543686	2.56805	0.543686	0.0332488	0.0180769	0.0853846	0.0180769	4.7234	1	4.7234
	113710	67.296	28	240	37	0.416072	3.56633	0.54981	0.0258831	0.0107692	0.0923077	0.0142308	6.48649	1.32143	8.57143
	145859	56.98	33	211	29	0.579151	3.70305	0.508951	0.0219154	0.0126923	0.0811538	0.0111538	7.27586	0.878788	6.39394
	113686	80.438	30	268	39	0.372958	3.33176	0.484845	0.0309377	0.0115385	0.103077	0.015	6.87179	1.3	8.93333
	113830	33.895	13	174	28	0.383537	5.1335	0.826081	0.0130365	0.005	0.0669231	0.0107692	6.21429	2.15385	13.3846
	112078	89.615	23	218	36	0.256653	2.43263	0.401718	0.0344673	0.00884615	0.0838462	0.0138462	6.05556	1.56522	9.47826
	120048	57.097	30	161	31	0.525422	2.81976	0.542936	0.0219604	0.0115385	0.0619231	0.0119231	5.19355	1.03333	5.36667
	126961	90.762	45	255	55	0.495802	2.80955	0.60598	0.0349085	0.0173077	0.0980769	0.0211538	4.63636	1.22222	5.66667
	154160	69.273	36	118	22	0.519683	1.70341	0.317584	0.0266435	0.0138462	0.0453846	0.00846154	5.36364	0.611111	3.27778
	155752	27.397	4	58	12	0.146001	2.11702	0.438004	0.0105373	0.00153846	0.0223077	0.00461538	4.83333	3	14.5
	160137	44.148	13	115	15	0.294464	2.60487	0.339766	0.01698	0.005	0.0442308	0.00576923	7.66667	1.15385	8.84615
	160746	41.029	27	103	20	0.658071	2.51042	0.48746	0.0157804	0.0103846	0.0396154	0.00769231	5.15	0.740741	3.81481
	210330	65.774	25	156	25	0.380089	2.37176	0.380089	0.0252977	0.00961538	0.06	0.00961538	6.24	1	6.24
	166347	54.029	26	157	35	0.481223	2.90585	0.6478	0.0207804	0.01	0.0603846	0.0134615	4.48571	1.34615	6.03846
	145512	91.883	44	85	17	0.47887	0.92509	0.185018	0.0353396	0.0169231	0.0326923	0.00653846	5	0.386364	1.93182
	148992	24.066	7	78	16	0.290867	3.24109	0.664838	0.00925615	0.00269231	0.03	0.00615385	4.875	2.28571	11.1429
	150217	26.125	15	68	14	0.574163	2.60287	0.535885	0.0100481	0.00576923	0.0261538	0.00538462	4.85714	0.933333	4.53333
	178116	53.013	23	86	20	0.433856	1.62224	0.377266	0.0203896	0.00884615	0.0330769	0.00769231	4.3	0.869565	3.73913
	177719	39.945	21	83	17	0.525723	2.07786	0.425585	0.0153635	0.00807692	0.0319231	0.00653846	4.88235	0.809524	3.95238
	150564	67.163	29	139	31	0.431785	2.06959	0.461564	0.0258319	0.0111538	0.0534615	0.0119231	4.48387	1.06897	4.7931
	120053	59.178	22	202	32	0.37176	3.41343	0.540741	0.0227608	0.00846154	0.0776923	0.0123077	6.3125	1.45455	9.18182
	124777	93.843	37	186	36	0.394276	1.98203	0.383619	0.0360935	0.0142308	0.0715385	0.0138462	5.16667	0.972973	5.02703
	249283	78.3	24	45	13	0.306513	0.574713	0.166028	0.0301154	0.00923077	0.0173077	0.005	3.46154	0.541667	1.875
	113676	70.471	20	179	30	0.283805	2.54005	0.425707	0.0271042	0.00769231	0.0688462	0.0115385	5.96667	1.5	8.95
	125241	55.078	21	180	28	0.381277	3.26809	0.50837	0.0211838	0.00807692	0.0692308	0.0107692	6.42857	1.33333	8.57143
	126846	101.391	43	138	27	0.424101	1.36107	0.266296	0.0389965	0.0165385	0.0530769	0.0103846	5.11111	0.627907	3.2093
	129577	70.509	39	178	35	0.553121	2.5245	0.496391	0.0271188	0.015	0.0684615	0.0134615	5.08571	0.897436	4.5641
	131099	92.515	25	239	38	0.270226	2.58336	0.410744	0.0355827	0.00961538	0.0919231	0.0146154	6.28947	1.52	9.56
	126856	95.521	35	211	42	0.366412	2.20894	0.439694	0.0367388	0.0134615	0.0811538	0.0161538	5.02381	1.2	6.02857
	195335	21.998	10	48	10	0.454587	2.18202	0.454587	0.00846077	0.00384615	0.0184615	0.00384615	4.8	1	4.8
	202929	50.931	13	108	17	0.255247	2.12052	0.333785	0.0195888	0.005	0.0415385	0.00653846	6.35294	1.30769	8.30769
	112135	36.218	11	146	23	0.303716	4.03114	0.635043	0.01393	0.00423077	0.0561538	0.00884615	6.34783	2.09091	13.2727
	137790	47.387	19	129	21	0.400954	2.72227	0.44316	0.0182258	0.00730769	0.0496154	0.00807692	6.14286	1.10526	6.78947
	113720	42.797	18	156	23	0.42059	3.64512	0.537421	0.0164604	0.00692308	0.06	0.00884615	6.78261	1.27778	8.66667
	112162	59.209	24	159	25	0.405344	2.6854	0.422233	0.0227727	0.00923077	0.0611538	0.00961538	6.36	1.04167	6.625
	112025	77.294	30	240	35	0.388128	3.10503	0.452817	0.0297285	0.0115385	0.0923077	0.0134615	6.85714	1.16667	8
	111993	51.49	17	146	22	0.330161	2.8355	0.427267	0.0198038	0.00653846	0.0561538	0.00846154	6.63636	1.29412	8.58824
	220510	55.579	13	93	21	0.233901	1.67329	0.377841	0.0213765	0.005	0.0357692	0.00807692	4.42857	1.61538	7.15385
	244670	12.548	3	29	6	0.239082	2.31113	0.478164	0.00482615	0.00115385	0.0111538	0.00230769	4.83333	2	9.66667
	238212	21.276	7	88	15	0.329009	4.13612	0.70502	0.00818308	0.00269231	0.0338462	0.00576923	5.86667	2.14286	12.5714
n	46
SUM		2726.65	1083	6828	1213	17.8805	120.613	21.1558	1.04871	0.416538	2.62615	0.466538
mean		59.2749	23.5435	148.435	26.3696	0.388706	2.62201	0.459909	0.022798	0.00905518	0.0570903	0.0101421	5.69992	1.27219	7.28868
STDV						0.112482	0.87932	0.129485	0.00956498	0.00456576	0.0256952	0.00448488	1.15443	0.480182	2.98123
SEM						0.0165846	0.129649	0.0190915	0.00141028	0.000673185	0.00378854	0.000661259	0.170211	0.070799	0.439559

## Sheet: PN
DA2
	Skeleton	length	input	output	T-bar	inputs/length (µm)	outputs/length (µm)	T-bars/length (µm)	innervation density	input/µm^3	output/µm^3	T-bar/µm^3	poliadicity	T-bar/post	outputs/post
	70021	206.91	172	66	14	0.831279	0.318979	0.0676623	0.129319	0.1075	0.04125	0.00875	4.71429	0.0813953	0.383721
	33590	357.423	311	135	24	0.870117	0.377704	0.0671473	0.223389	0.194375	0.084375	0.015	5.625	0.0771704	0.434084
	357381	1655.96	1392	717	139	0.840598	0.432981	0.0839391	1.03498	0.87	0.448125	0.086875	5.15827	0.0998563	0.515086
	299511	463.074	395	123	25	0.852995	0.265616	0.0539871	0.289421	0.246875	0.076875	0.015625	4.92	0.0632911	0.311392
	77074	556.27	480	153	30	0.86289	0.275046	0.0539306	0.347669	0.3	0.095625	0.01875	5.1	0.0625	0.31875
	107276	1232.69	1008	374	77	0.817725	0.303402	0.0624651	0.77043	0.63	0.23375	0.048125	4.85714	0.0763889	0.371032
	30303	179.976	129	56	13	0.716762	0.311153	0.0722319	0.112485	0.080625	0.035	0.008125	4.30769	0.100775	0.434109
n	7
SUM		4652.3	3887	1624	322	5.79237	2.28488	0.461363	2.90769	2.42937	1.015	0.20125	34.6824	0.561377	2.76817
mean		664.615	555.286	232	46	0.827481	0.326412	0.065909	0.415384	0.347054	0.145	0.02875	4.95463	0.0801968	0.395453
STDV		562.223	469.876	238.555	46.3753	0.0520624	0.0593574	0.0105447	0.35139	0.293673	0.149097	0.0289846	0.408043	0.0154598	0.0718589
SEM		212.5	177.597	90.1655	17.5282	0.0196778	0.022435	0.00398552	0.132813	0.110998	0.0563534	0.0109551	0.154226	0.00584327	0.0271601
DL5
	Skeleton	length	input	output	T-bar	inputs/length (µm)	outputs/length (µm)	T-bars/length (µm)	innervation density	input/µm^3	output/µm^3	T-bar/µm^3	polyadicity	T-bar/post	outputs/post
	277751	57.445	46	28	7	0.788618	0.619728	0.120037	1.92888	1.52115	1.19538	0.231538	5.16279	0.152212	0.785841
	349357	94.342	79	60	12
	163628	12.985	16
	355706	4461.18	3506	2813	537
	250859	64.011	58	32	7
	251229	155.749	131	133	30
	267592	169.386	119	42	9
SUM		5015.1	3955	3108	602
							0.555556

## Sheet: MGNs
DA2	Skeleton	length	input	output	T-bar	inputs/length (µm)	outputs/length (µm)	T-bars/length (µm)	innervation density	input/µm^3	output/µm^3	T-bar/µm^3	polyadicity	T-bar/post	outputs/post
	38640	537.947	374	266	63	0.695236	0.494473	0.117112	0.336217	0.23375	0.16625	0.039375	4.22222	0.168449	0.71123
	44235	419.255	371	206	42	0.884903	0.491348	0.100178	0.262034	0.231875	0.12875	0.02625	4.90476	0.113208	0.555256
	102932	281.942	339	144	29	1.20237	0.510743	0.102858	0.176214	0.211875	0.09	0.018125	4.96552	0.0855457	0.424779
	107298	264.993	148	0	0	0.558505	0	0	0.165621	0.0925	0	0	0	0	0
	50080	262.143	126			0.480654	0	0	0.163839	0.07875	0	0	0	0	0
	33293	259.833	142	144	29	0.546505	0.554202	0.11161	0.162396	0.08875	0.09	0.018125	4.96552	0.204225	1.01408
	53093	217.159	97			0.446677	0	0	0.135724	0.060625	0	0	0	0	0
	307795	197.011	136	101	20	0.690317	0.512662	0.101517	0.123132	0.085	0.063125	0.0125	5.05	0.147059	0.742647
	23752	196.909	162	214	50	0.822715	1.0868	0.253924	0.123068	0.10125	0.13375	0.03125	4.28	0.308642	1.32099
	74856	190.981	137	134	23	0.717349	0.70164	0.120431	0.119363	0.085625	0.08375	0.014375	5.82609	0.167883	0.978102
	103987	185.135	198	8	2	1.06949	0.0432117	0.0108029	0.115709	0.12375	0.005	0.00125	4	0.010101	0.040404
	70931	170.149	98	191	36	0.575966	1.12255	0.211579	0.106343	0.06125	0.119375	0.0225	5.30556	0.367347	1.94898
	33773	170.1	112	85	16	0.658436	0.499706	0.0940623	0.106312	0.07	0.053125	0.01	5.3125	0.142857	0.758929
	68084	167.238	114	73	21	0.681663	0.436504	0.12557	0.104524	0.07125	0.045625	0.013125	3.47619	0.184211	0.640351
	55643	161.277	109	82	18	0.675856	0.508442	0.111609	0.100798	0.068125	0.05125	0.01125	4.55556	0.165138	0.752294
	2245	152.415	139	95	20	0.911984	0.623298	0.131221	0.0952594	0.086875	0.059375	0.0125	4.75	0.143885	0.683453
	30223	151.491	115	50	13	0.759121	0.330053	0.0858137	0.0946819	0.071875	0.03125	0.008125	3.84615	0.113043	0.434783
	14284	148.395	117	109	28	0.788436	0.734526	0.188686	0.0927469	0.073125	0.068125	0.0175	3.89286	0.239316	0.931624
	28640	146.129	93	39	11	0.636424	0.266887	0.075276	0.0913306	0.058125	0.024375	0.006875	3.54545	0.11828	0.419355
	92508	141.931	95	193	29	0.669339	1.35982	0.204325	0.0887069	0.059375	0.120625	0.018125	6.65517	0.305263	2.03158
	87486	140.125	116	97	27	0.827832	0.692239	0.192685	0.0875781	0.0725	0.060625	0.016875	3.59259	0.232759	0.836207
	87425	126.101	103	75	22	0.816806	0.594761	0.174463	0.0788131	0.064375	0.046875	0.01375	3.40909	0.213592	0.728155
	368140	124.99	112	103	29	0.896072	0.824066	0.232019	0.0781188	0.07	0.064375	0.018125	3.55172	0.258929	0.919643
	105447	116.455	56	185	32	0.480872	1.5886	0.274784	0.0727844	0.035	0.115625	0.02	5.78125	0.571429	3.30357
	154045	111.399	88	58	14	0.789953	0.520651	0.125674	0.0696244	0.055	0.03625	0.00875	4.14286	0.159091	0.659091
	340241	103.62	75	60	14	0.723798	0.579039	0.135109	0.0647625	0.046875	0.0375	0.00875	4.28571	0.186667	0.8
	50017	101.035	86	58	12	0.85119	0.574058	0.118771	0.0631469	0.05375	0.03625	0.0075	4.83333	0.139535	0.674419
	109134	100.697	56	72	17	0.556124	0.715016	0.168823	0.0629356	0.035	0.045	0.010625	4.23529	0.303571	1.28571
	57265	100.684	58	72	17	0.57606	0.715109	0.168845	0.0629275	0.03625	0.045	0.010625	4.23529	0.293103	1.24138
	112287	96.121	53	23	7	0.551388	0.239282	0.0728249	0.0600756	0.033125	0.014375	0.004375	3.28571	0.132075	0.433962
	228664	92.565	58	34	11	0.626587	0.367309	0.118835	0.0578531	0.03625	0.02125	0.006875	3.09091	0.189655	0.586207
	74744	90.215	56			0.620739	0	0	0.0563844	0.035	0	0	0	0	0
	229693	89.125	58	59	14	0.650771	0.661992	0.157083	0.0557031	0.03625	0.036875	0.00875	4.21429	0.241379	1.01724
	44325	88.478	65	86	23	0.734646	0.971993	0.259952	0.0552987	0.040625	0.05375	0.014375	3.73913	0.353846	1.32308
	68714	87.307	60	53	13	0.68723	0.607053	0.1489	0.0545669	0.0375	0.033125	0.008125	4.07692	0.216667	0.883333
	279378	85.337	44	27	9	0.515603	0.316393	0.105464	0.0533356	0.0275	0.016875	0.005625	3	0.204545	0.613636
	30667	82.562	70	90	24	0.847848	1.09009	0.290691	0.0516013	0.04375	0.05625	0.015	3.75	0.342857	1.28571
	56823	79.913	35	68	14	0.437976	0.850925	0.175191	0.0499456	0.021875	0.0425	0.00875	4.85714	0.4	1.94286
	81524	77.829	42			0.539645	0	0	0.0486431	0.02625	0	0	0	0	0
	11470	73.17	47	55	14	0.64234	0.751674	0.191335	0.0457313	0.029375	0.034375	0.00875	3.92857	0.297872	1.17021
	16964	72.688	63	48	12	0.866718	0.660357	0.165089	0.04543	0.039375	0.03	0.0075	4	0.190476	0.761905
	229729	72.659	47	54	14	0.646857	0.743198	0.192681	0.0454119	0.029375	0.03375	0.00875	3.85714	0.297872	1.14894
	49943	72.462	39	24	6	0.538213	0.331208	0.082802	0.0452888	0.024375	0.015	0.00375	4	0.153846	0.615385
	230532	71.862	43	32	9	0.598369	0.445298	0.12524	0.0449137	0.026875	0.02	0.005625	3.55556	0.209302	0.744186
	229885	70.816	31			0.437754	0	0	0.04426	0.019375	0	0	0	0	0
	77286	70.132	53	41	11	0.755718	0.584612	0.156847	0.0438325	0.033125	0.025625	0.006875	3.72727	0.207547	0.773585
	41435	68.806	50	54	11	0.726681	0.784815	0.15987	0.0430038	0.03125	0.03375	0.006875	4.90909	0.22	1.08
	135584	67.815	40	52	15	0.58984	0.766792	0.22119	0.0423844	0.025	0.0325	0.009375	3.46667	0.375	1.3
	111263	64.498	45	49	12	0.697696	0.759713	0.186052	0.0403112	0.028125	0.030625	0.0075	4.08333	0.266667	1.08889
	34418	63.858	27	50	8	0.422813	0.782987	0.125278	0.0399112	0.016875	0.03125	0.005	6.25	0.296296	1.85185
	99126	63.616	33	16	4	0.518737	0.251509	0.0628773	0.03976	0.020625	0.01	0.0025	4	0.121212	0.484848
	102411	62.926	39	34	7	0.619776	0.540317	0.111242	0.0393288	0.024375	0.02125	0.004375	4.85714	0.179487	0.871795
	76977	62.553	43	49	14	0.687417	0.783336	0.22381	0.0390956	0.026875	0.030625	0.00875	3.5	0.325581	1.13953
	253795	61.033	39	17	4	0.638999	0.278538	0.0655383	0.0381456	0.024375	0.010625	0.0025	4.25	0.102564	0.435897
	136226	60.639	59	31	8	0.972971	0.511222	0.131928	0.0378994	0.036875	0.019375	0.005	3.875	0.135593	0.525424
	76076	59.517	45			0.756086	0	0	0.0371981	0.028125	0	0	0	0	0
	61924	58.821	48	38	7	0.816035	0.646028	0.119005	0.0367631	0.03	0.02375	0.004375	5.42857	0.145833	0.791667
	18069	58.738	20	84	13	0.340495	1.43008	0.221322	0.0367113	0.0125	0.0525	0.008125	6.46154	0.65	4.2
	229709	56.462	48	34	10	0.850129	0.602175	0.17711	0.0352888	0.03	0.02125	0.00625	3.4	0.208333	0.708333
	42753	54.593	55	57	15	1.00746	1.04409	0.274761	0.0341206	0.034375	0.035625	0.009375	3.8	0.272727	1.03636
	101065	53.681	26			0.484343	0	0	0.0335506	0.01625	0	0	0	0	0
	228627	53.348	37	53	14	0.693559	0.993477	0.262428	0.0333425	0.023125	0.033125	0.00875	3.78571	0.378378	1.43243
	56316	53.341	38	61	10	0.712398	1.14359	0.187473	0.0333381	0.02375	0.038125	0.00625	6.1	0.263158	1.60526
	49383	51.023	60	16	4	1.17594	0.313584	0.078396	0.0318894	0.0375	0.01	0.0025	4	0.0666667	0.266667
	261981	50.888	26	31	8	0.510926	0.609181	0.157208	0.031805	0.01625	0.019375	0.005	3.875	0.307692	1.19231
	14129	50.637	26	49	13	0.513459	0.967672	0.256729	0.0316481	0.01625	0.030625	0.008125	3.76923	0.5	1.88462
	94071	50.526	19			0.376044	0	0	0.0315788	0.011875	0	0	0	0	0
	34626	48.472	23	25	6	0.474501	0.515762	0.123783	0.030295	0.014375	0.015625	0.00375	4.16667	0.26087	1.08696
	242753	47.689	43			0.901675	0	0	0.0298056	0.026875	0	0	0	0	0
	368029	47.687	32	37	9	0.671042	0.775893	0.188731	0.0298044	0.02	0.023125	0.005625	4.11111	0.28125	1.15625
	155588	47.433	43	29	9	0.906542	0.611389	0.189741	0.0296456	0.026875	0.018125	0.005625	3.22222	0.209302	0.674419
	294656	46.966	52	19	2	1.10718	0.404548	0.042584	0.0293538	0.0325	0.011875	0.00125	9.5	0.0384615	0.365385
	81152	46.211	23			0.497717	0	0	0.0288819	0.014375	0	0	0	0	0
	31416	45.566	36	35	9	0.790063	0.768117	0.197516	0.0284788	0.0225	0.021875	0.005625	3.88889	0.25	0.972222
	28048	44.919	35			0.77918	0	0	0.0280744	0.021875	0	0	0	0	0
	105691	44.281	15	41	6	0.338746	0.925905	0.135498	0.0276756	0.009375	0.025625	0.00375	6.83333	0.4	2.73333
	135022	43.84	24	27	8	0.547445	0.615876	0.182482	0.0274	0.015	0.016875	0.005	3.375	0.333333	1.125
	136467	43.346	36	24	6	0.830526	0.553684	0.138421	0.0270912	0.0225	0.015	0.00375	4	0.166667	0.666667
	249525	42.302	28	38	7	0.661907	0.898303	0.165477	0.0264388	0.0175	0.02375	0.004375	5.42857	0.25	1.35714
	111066	41.486	37	18	4	0.891867	0.433881	0.0964181	0.0259287	0.023125	0.01125	0.0025	4.5	0.108108	0.486486
	57939	41.027	27	3	1	0.658103	0.0731226	0.0243742	0.0256419	0.016875	0.001875	0.000625	3	0.037037	0.111111
	294598	40.224	17	44	7	0.422633	1.09387	0.174025	0.02514	0.010625	0.0275	0.004375	6.28571	0.411765	2.58824
	76783	40.003	23			0.574957	0	0	0.0250019	0.014375	0	0	0	0	0
	296491	39.492	10	5	1	0.253216	0.126608	0.0253216	0.0246825	0.00625	0.003125	0.000625	5	0.1	0.5
	76717	39.338	31	31	6	0.788042	0.788042	0.152524	0.0245863	0.019375	0.019375	0.00375	5.16667	0.193548	1
	97142	39.324	27			0.686604	0	0	0.0245775	0.016875	0	0	0	0	0
	73596	38.509	23	22	5	0.597263	0.571295	0.12984	0.0240681	0.014375	0.01375	0.003125	4.4	0.217391	0.956522
	103653	37.303	24	39	8	0.64338	1.04549	0.21446	0.0233144	0.015	0.024375	0.005	4.875	0.333333	1.625
	188763	36.268	23	35	7	0.634168	0.965038	0.193008	0.0226675	0.014375	0.021875	0.004375	5	0.304348	1.52174
	5613	35.037	34	28	6	0.970403	0.799155	0.171248	0.0218981	0.02125	0.0175	0.00375	4.66667	0.176471	0.823529
	300227	33.443	21			0.627934	0	0	0.0209019	0.013125	0	0	0	0	0
	26898	32.502	24	19	5	0.738416	0.584579	0.153837	0.0203138	0.015	0.011875	0.003125	3.8	0.208333	0.791667
	65713	31.604	11	3	1	0.348057	0.0949247	0.0316416	0.0197525	0.006875	0.001875	0.000625	3	0.0909091	0.272727
	41879	31.339	21	35	10	0.670092	1.11682	0.319091	0.0195869	0.013125	0.021875	0.00625	3.5	0.47619	1.66667
	55283	31.203	6	14	2	0.192289	0.448675	0.0640964	0.0195019	0.00375	0.00875	0.00125	7	0.333333	2.33333
	59624	31.178	11			0.352813	0	0	0.0194863	0.006875	0	0	0	0	0
	54416	30.886	10	14	4	0.323771	0.45328	0.129509	0.0193037	0.00625	0.00875	0.0025	3.5	0.4	1.4
	295881	30.631	28	24	4	0.914107	0.78352	0.130587	0.0191444	0.0175	0.015	0.0025	6	0.142857	0.857143
	29513	29.815	24	37	9	0.804964	1.24099	0.301861	0.0186344	0.015	0.023125	0.005625	4.11111	0.375	1.54167
	68812	29.259	17			0.581018	0	0	0.0182869	0.010625	0	0	0	0	0
	103759	28.597	16	28	4	0.559499	0.979124	0.139875	0.0178731	0.01	0.0175	0.0025	7	0.25	1.75
	365319	28.381	21			0.739932	0	0	0.0177381	0.013125	0	0	0	0	0
	29866	26.744	7			0.261741	0	0	0.016715	0.004375	0	0	0	0	0
	42945	26.572	16	20	2	0.602138	0.752672	0.0752672	0.0166075	0.01	0.0125	0.00125	10	0.125	1.25
	49815	26.453	14	26	5	0.529241	0.982875	0.189014	0.0165331	0.00875	0.01625	0.003125	5.2	0.357143	1.85714
	135697	26.374	25	20	4	0.947903	0.758323	0.151665	0.0164837	0.015625	0.0125	0.0025	5	0.16	0.8
	19403	26.146	23	15	3	0.879676	0.573702	0.11474	0.0163413	0.014375	0.009375	0.001875	5	0.130435	0.652174
	82365	25.976	13			0.500462	0	0	0.016235	0.008125	0	0	0	0	0
	296026	25.489	18			0.706187	0	0	0.0159306	0.01125	0	0	0	0	0
	254146	24.677	13	4	1	0.526806	0.162094	0.0405236	0.0154231	0.008125	0.0025	0.000625	4	0.0769231	0.307692
	40946	24.469	8			0.326944	0	0	0.0152931	0.005	0	0	0	0	0
	101487	23.897	17			0.711386	0	0	0.0149356	0.010625	0	0	0	0	0
	274508	22.889	10	26	5	0.436891	1.13592	0.218446	0.0143056	0.00625	0.01625	0.003125	5.2	0.5	2.6
	93367	22.832	6			0.262789	0	0	0.01427	0.00375	0	0	0	0	0
	303065	22.756	13			0.571278	0	0	0.0142225	0.008125	0	0	0	0	0
	50780	22.069	4	10	2	0.18125	0.453124	0.0906249	0.0137931	0.0025	0.00625	0.00125	5	0.5	2.5
	246053	22.052	17	17	4	0.770905	0.770905	0.181389	0.0137825	0.010625	0.010625	0.0025	4.25	0.235294	1
	228644	22.052	14	12	3	0.634863	0.544168	0.136042	0.0137825	0.00875	0.0075	0.001875	4	0.214286	0.857143
	232676	22.048	7	16	3	0.317489	0.725689	0.136067	0.01378	0.004375	0.01	0.001875	5.33333	0.428571	2.28571
	66896	21.601	14	36	7	0.648118	1.66659	0.324059	0.0135006	0.00875	0.0225	0.004375	5.14286	0.5	2.57143
	12025	21.42	12			0.560224	0	0	0.0133875	0.0075	0	0	0	0	0
	7637	21.143	13	7	2	0.614861	0.331079	0.094594	0.0132144	0.008125	0.004375	0.00125	3.5	0.153846	0.538462
	5190	21.112	9			0.426298	0	0	0.013195	0.005625	0	0	0	0	0
	27876	20.989		47	7	0	2.23927	0.333508	0.0131181	0	0.029375	0.004375	6.71429	0	0
	57363	20.945	16			0.763905	0	0	0.0130906	0.01	0	0	0	0	0
	86003	20.94	10			0.477555	0	0	0.0130875	0.00625	0	0	0	0	0
	96704	20.628	12	18	4	0.581734	0.8726	0.193911	0.0128925	0.0075	0.01125	0.0025	4.5	0.333333	1.5
	45396	20.508	15	4	1	0.731422	0.195046	0.0487615	0.0128175	0.009375	0.0025	0.000625	4	0.0666667	0.266667
	61153	20.272	15			0.739937	0	0	0.01267	0.009375	0	0	0	0	0
	351863	20.068	19	19	3	0.946781	0.946781	0.149492	0.0125425	0.011875	0.011875	0.001875	6.33333	0.157895	1
	93043	19.664	6	23	4	0.305126	1.16965	0.203417	0.01229	0.00375	0.014375	0.0025	5.75	0.666667	3.83333
	45916	18.671	13			0.696267	0	0	0.0116694	0.008125	0	0	0	0	0
	146033	18.608	2			0.107481	0	0	0.01163	0.00125	0	0	0	0	0
	19268	18.546	17			0.91664	0	0	0.0115912	0.010625	0	0	0	0	0
	249434	18.395	2	17	3	0.108725	0.924164	0.163088	0.0114969	0.00125	0.010625	0.001875	5.66667	1.5	8.5
	294611	18.338	4	8	2	0.218126	0.436253	0.109063	0.0114613	0.0025	0.005	0.00125	4	0.5	2
	15955	17.752	5			0.281658	0	0	0.011095	0.003125	0	0	0	0	0
	243699	17.731	7			0.394789	0	0	0.0110819	0.004375	0	0	0	0	0
	50742	17.061	10	13	4	0.586132	0.761972	0.234453	0.0106631	0.00625	0.008125	0.0025	3.25	0.4	1.3
	66936	16.677	7			0.41974	0	0	0.0104231	0.004375	0	0	0	0	0
	53786	16.639	7			0.420698	0	0	0.0103994	0.004375	0	0	0	0	0
	303509	15.881	2			0.125937	0	0	0.00992563	0.00125	0	0	0	0	0
	253868	15.505	7	4	1	0.451467	0.257981	0.0644953	0.00969063	0.004375	0.0025	0.000625	4	0.142857	0.571429
	262108	15.462	11			0.711422	0	0	0.00966375	0.006875	0	0	0	0	0
	295950	15.432	8	6	2	0.518403	0.388802	0.129601	0.009645	0.005	0.00375	0.00125	3	0.25	0.75
	270772	15.419	7	11	3	0.453985	0.713406	0.194565	0.00963687	0.004375	0.006875	0.001875	3.66667	0.428571	1.57143
	83909	15.163	11			0.72545	0	0	0.00947688	0.006875	0	0	0	0	0
	38198	15.051	8			0.531526	0	0	0.00940688	0.005	0	0	0	0	0
	302435	14.928	6			0.401929	0	0	0.00933	0.00375	0	0	0	0	0
	270821	14.579	2	8	1	0.137184	0.548734	0.0685918	0.00911188	0.00125	0.005	0.000625	8	0.5	4
	16373	14.389	15	3	1	1.04246	0.208493	0.0694975	0.00899312	0.009375	0.001875	0.000625	3	0.0666667	0.2
	262099	13.936	9	9	2	0.645809	0.645809	0.143513	0.00871	0.005625	0.005625	0.00125	4.5	0.222222	1
	14075	13.873	8	13	2	0.57666	0.937072	0.144165	0.00867062	0.005	0.008125	0.00125	6.5	0.25	1.625
	271043	13.742	4	4	1	0.291078	0.291078	0.0727696	0.00858875	0.0025	0.0025	0.000625	4	0.25	1
	17763	12.869	1	4	1	0.0777061	0.310824	0.0777061	0.00804312	0.000625	0.0025	0.000625	4	1	4
	81157	12.74	5			0.392465	0	0	0.0079625	0.003125	0	0	0	0	0
	296855	12.229	4			0.327091	0	0	0.00764312	0.0025	0	0	0	0	0
	90458	12.09	9	7	2	0.744417	0.578991	0.165426	0.00755625	0.005625	0.004375	0.00125	3.5	0.222222	0.777778
	35172	11.67	3			0.257069	0	0	0.00729375	0.001875	0	0	0	0	0
	13225	11.494	8	3	1	0.696015	0.261006	0.0870019	0.00718375	0.005	0.001875	0.000625	3	0.125	0.375
	85417	11.194	9	5	1	0.804002	0.446668	0.0893336	0.00699625	0.005625	0.003125	0.000625	5	0.111111	0.555556
	98823	10.579	7			0.661688	0	0	0.00661188	0.004375	0	0	0	0	0
	297545	10.086	1	22	5	0.0991473	2.18124	0.495737	0.00630375	0.000625	0.01375	0.003125	4.4	5	22
	92888	10.039	3			0.298835	0	0	0.00627437	0.001875	0	0	0	0	0
	108308	9.931	10	9	2	1.00695	0.906253	0.20139	0.00620687	0.00625	0.005625	0.00125	4.5	0.2	0.9
	254104	9.779	9	11	3	0.92034	1.12486	0.30678	0.00611188	0.005625	0.006875	0.001875	3.66667	0.333333	1.22222
	3038	9.174	13	10	3	1.41705	1.09004	0.327011	0.00573375	0.008125	0.00625	0.001875	3.33333	0.230769	0.769231
	303350	9.019	6	17	2	0.665262	1.88491	0.221754	0.00563688	0.00375	0.010625	0.00125	8.5	0.333333	2.83333
	274760	8.8	5	10	2	0.568182	1.13636	0.227273	0.0055	0.003125	0.00625	0.00125	5	0.4	2
	365188	8.272	2			0.241779	0	0	0.00517	0.00125	0	0	0	0	0
	40799	8.06	4			0.496278	0	0	0.0050375	0.0025	0	0	0	0	0
	56055	6.282	6			0.95511	0	0	0.00392625	0.00375	0	0	0	0	0
	26065	6.223	2	8	2	0.321388	1.28555	0.321388	0.00388938	0.00125	0.005	0.00125	4	1	4
	86509	5.625	2	4	1	0.355556	0.711111	0.177778	0.00351563	0.00125	0.0025	0.000625	4	0.5	2
	26718	5.513	2	12	2	0.362779	2.17667	0.362779	0.00344562	0.00125	0.0075	0.00125	6	1	6
	101947	4.675	8	3	1	1.71123	0.641711	0.213904	0.00292187	0.005	0.001875	0.000625	3	0.125	0.375
	296113	4.605	3			0.651466	0	0	0.00287813	0.001875	0	0	0	0	0
	44270	4.552	6			1.3181	0	0	0.002845	0.00375	0	0	0	0	0
	295701	4.884	5	3	1	1.02375	0.614251	0.20475	0.0030525	0.003125	0.001875	0.000625	3	0.2	0.6
	111221	4.024	1	2	1	0.248509	0.497018	0.248509	0.002515	0.000625	0.00125	0.000625	2	1	2
n	180
SUM		10652.6	7207	5603	1250	111.631	92.8205	20.6227	6.65789	4.50437	3.50188	0.78125
mean		59.1813	40.2626	43.4341	9.68992	0.62017	0.515669	0.114571	0.0369883	0.0250243	0.0194549	0.00434028	3.22918	0.2269	1.03968
STDV						0.398387	0.636585	0.13331	0.00214148	0.00220507	0.00352745	0.000729377	2.51104	0.897115	3.98055
SEM						0.029694	0.0474483	0.00993633	0.000159616	0.000164356	0.000262921	5.43645e-05	0.187162	0.066867	0.296692
		DL5
Neuron	Skeleton	length	input	output	T-bar	inputs/length (µm)	outputs/length (µm)	T-bars/length (µm)	innervation density	input/µm^3	output/µm^3	T-bar/µm^3	poliadicity	T-bar/post	outputs/post
	146277	724.334	461	411	93	0.636447	0.567418	0.128394	0.27859	0.177308	0.158077	0.0357692	4.41935	0.201735	0.89154
	140064	588.101	456	329	58	0.775377	0.559428	0.0986225	0.226193	0.175385	0.126538	0.0223077	5.67241	0.127193	0.721491
	185354	519.506	375	270	58	0.72184	0.519725	0.111645	0.19981	0.144231	0.103846	0.0223077	4.65517	0.154667	0.72
	355436	464.412	242	174	43	0.521089	0.374667	0.0925902	0.17862	0.0930769	0.0669231	0.0165385	4.04651	0.177686	0.719008
	135742	455.521	293	278	68	0.64322	0.61029	0.14928	0.1752	0.112692	0.106923	0.0261538	4.08824	0.232082	0.948805
	282267	304.056	229	73	15	0.753151	0.240087	0.049333	0.116945	0.0880769	0.0280769	0.00576923	4.86667	0.0655022	0.318777
	145837	299.52	199	160	35	0.664396	0.534188	0.116854	0.1152	0.0765385	0.0615385	0.0134615	0	0.175879	0.80402
	173341	283.113	168	77	21	0.593403	0.271976	0.0741753	0.10889	0.0646154	0.0296154	0.00807692	0	0.125	0.458333
	121097	271.923	181	241	56	0.66563	0.88628	0.205941	0.104586	0.0696154	0.0926923	0.0215385	4.30357	0.309392	1.33149
	252367	265.801	142	63	13	0.534234	0.237019	0.0489088	0.102231	0.0546154	0.0242308	0.005	4.84615	0.0915493	0.443662
	233415	248.773	159	15	3	0.639137	0.0602959	0.0120592	0.0956819	0.0611538	0.00576923	0.00115385	5	0.0188679	0.0943396
	181985	232.888	118	5	1	0.506681	0.0214695	0.00429391	0.0895723	0.0453846	0.00192308	0.000384615	0	0.00847458	0.0423729
	250426	231.716	142	19	3	0.612819	0.0819969	0.0129469	0.0891215	0.0546154	0.00730769	0.00115385	6.33333	0.0211268	0.133803
	319423	219.076	130	108	27	0.593401	0.49298	0.123245	0.08426	0.05	0.0415385	0.0103846	4	0.207692	0.830769
	192197	212.7	179	133	28	0.841561	0.625294	0.131641	0.0818077	0.0688462	0.0511538	0.0107692	4.75	0.156425	0.743017
	119785	211.22	98	75	17	0.463971	0.35508	0.0804848	0.0812385	0.0376923	0.0288462	0.00653846	4.41176	0.173469	0.765306
	129691	194.541	142	96	27	0.729923	0.493469	0.138788	0.0748235	0.0546154	0.0369231	0.0103846	3.55556	0.190141	0.676056
	198761	182.927	83	8	2	0.453733	0.0437333	0.0109333	0.0703565	0.0319231	0.00307692	0.000769231	0	0.0240964	0.0963855
	204386	164.204	92	130	28	0.560279	0.791698	0.17052	0.0631554	0.0353846	0.05	0.0107692	4.64286	0.304348	1.41304
	151172	160.691	119	97	17	0.740552	0.603643	0.105793	0.0618042	0.0457692	0.0373077	0.00653846	5.70588	0.142857	0.815126
	193363	157.343	122	75	16	0.775376	0.476666	0.101689	0.0605165	0.0469231	0.0288462	0.00615385	4.6875	0.131148	0.614754
	179462	145.724	97	74	19	0.665642	0.507809	0.130383	0.0560477	0.0373077	0.0284615	0.00730769	0	0.195876	0.762887
	138427	138.118	90	91	25	0.651617	0.658857	0.181005	0.0531223	0.0346154	0.035	0.00961538	3.64	0.277778	1.01111
	122549	131.47	95	80	22	0.722598	0.608504	0.167339	0.0505654	0.0365385	0.0307692	0.00846154	0	0.231579	0.842105
	191107	126.995	88	58	15	0.692941	0.456711	0.118115	0.0488442	0.0338462	0.0223077	0.00576923	3.86667	0.170455	0.659091
	188300	126.866	99	84	21	0.780351	0.662116	0.165529	0.0487946	0.0380769	0.0323077	0.00807692	4	0.212121	0.848485
	250353	126.26	75	27	7	0.594012	0.213844	0.0554412	0.0485615	0.0288462	0.0103846	0.00269231	3.85714	0.0933333	0.36
	160172	124.946	54	113	24	0.432187	0.904391	0.192083	0.0480562	0.0207692	0.0434615	0.00923077	4.70833	0.444444	2.09259
	203594	122.491	68	54	13	0.555143	0.440849	0.10613	0.0471119	0.0261538	0.0207692	0.005	0	0.191176	0.794118
	166706	120.807	67	39	11	0.554604	0.322829	0.0910543	0.0464642	0.0257692	0.015	0.00423077	3.54545	0.164179	0.58209
	186717	113.994	66	62	8	0.578978	0.543888	0.0701791	0.0438438	0.0253846	0.0238462	0.00307692	7.75	0.121212	0.939394
	220294	110.791	73	42	13	0.658898	0.379092	0.117338	0.0426119	0.0280769	0.0161538	0.005	0	0.178082	0.575342
	193575	107.536	67	64	15	0.623047	0.59515	0.139488	0.04136	0.0257692	0.0246154	0.00576923	4.26667	0.223881	0.955224
	255362	107.14	87	83	18	0.812022	0.774687	0.168004	0.0412077	0.0334615	0.0319231	0.00692308	4.61111	0.206897	0.954023
	150421	102.93	65	55	15	0.631497	0.534344	0.14573	0.0395885	0.025	0.0211538	0.00576923	3.66667	0.230769	0.846154
	171885	97.756	64	37	9	0.654691	0.378493	0.092066	0.0375985	0.0246154	0.0142308	0.00346154	4.11111	0.140625	0.578125
	180563	94.622	67	48	12	0.708081	0.507282	0.12682	0.0363931	0.0257692	0.0184615	0.00461538	4	0.179104	0.716418
	170885	93.711	44	111	19	0.469529	1.18449	0.202751	0.0360427	0.0169231	0.0426923	0.00730769	5.84211	0.431818	2.52273
	266380	93.515	84	58	14	0.898252	0.620221	0.149709	0.0359673	0.0323077	0.0223077	0.00538462	4.14286	0.166667	0.690476
	366070	92.171	43			0.466524	0	0	0.0354504	0.0165385	0	0	0	0	0
	222057	88.822	65	31	8	0.731801	0.349013	0.0900678	0.0341623	0.025	0.0119231	0.00307692	3.875	0.123077	0.476923
	213309	88.696	29	18	5	0.32696	0.20294	0.0563723	0.0341138	0.0111538	0.00692308	0.00192308	0	0.172414	0.62069
	69772	87.136	46	32	8	0.52791	0.367242	0.0918105	0.0335138	0.0176923	0.0123077	0.00307692	4	0.173913	0.695652
	278189	85.627	27	27	8	0.315321	0.315321	0.0934285	0.0329335	0.0103846	0.0103846	0.00307692	3.375	0.296296	1
	143605	85.624	58	38	9	0.67738	0.443801	0.105111	0.0329323	0.0223077	0.0146154	0.00346154	4.22222	0.155172	0.655172
	175859	83.157	51	16	5	0.613298	0.192407	0.0601272	0.0319835	0.0196154	0.00615385	0.00192308	3.2	0.0980392	0.313725
	167153	83.154	52	35	12	0.625346	0.420906	0.144311	0.0319823	0.02	0.0134615	0.00461538	2.91667	0.230769	0.673077
	183560	81.058	56	50	14	0.690863	0.616842	0.172716	0.0311762	0.0215385	0.0192308	0.00538462	3.57143	0.25	0.892857
	137519	79.314	10	18	3	0.126081	0.226946	0.0378243	0.0305054	0.00384615	0.00692308	0.00115385	0	0.3	1.8
	200808	79.148	30	13	4	0.379037	0.164249	0.0505382	0.0304415	0.0115385	0.005	0.00153846	3.25	0.133333	0.433333
	176771	78.907	37	33	7	0.468906	0.418214	0.088712	0.0303488	0.0142308	0.0126923	0.00269231	4.71429	0.189189	0.891892
	225492	75.943	49	60	10	0.645221	0.790066	0.131678	0.0292088	0.0188462	0.0230769	0.00384615	6	0.204082	1.22449
	253565	72.682	20	15	5	0.275171	0.206378	0.0687928	0.0279546	0.00769231	0.00576923	0.00192308	0	0.25	0.75
	209947	72.422	44	28	6	0.60755	0.386623	0.0828478	0.0278546	0.0169231	0.0107692	0.00230769	0	0.136364	0.636364
	190555	71.409	67	51	12	0.938257	0.714196	0.168046	0.027465	0.0257692	0.0196154	0.00461538	4.25	0.179104	0.761194
	128092	70.089	31			0.442295	0	0	0.0269573	0.0119231	0	0	0	0	0
	192913	69.527	40	33	7	0.575316	0.474636	0.10068	0.0267412	0.0153846	0.0126923	0.00269231	4.71429	0.175	0.825
	215645	69.073	51	33	7	0.738349	0.477755	0.101342	0.0265665	0.0196154	0.0126923	0.00269231	0	0.137255	0.647059
	219558	68.229	42	51	12	0.615574	0.747483	0.175878	0.0262419	0.0161538	0.0196154	0.00461538	0	0.285714	1.21429
	140401	68.178	51	44	11	0.748042	0.645369	0.161342	0.0262223	0.0196154	0.0169231	0.00423077	4	0.215686	0.862745
	209339	66.512	57	59	15	0.856988	0.887058	0.225523	0.0255815	0.0219231	0.0226923	0.00576923	0	0.263158	1.03509
	152746	66.423	47	40	12	0.707586	0.602201	0.18066	0.0255473	0.0180769	0.0153846	0.00461538	3.33333	0.255319	0.851064
	262965	62.653	41	23	5	0.654398	0.367101	0.0798046	0.0240973	0.0157692	0.00884615	0.00192308	0	0.121951	0.560976
	224040	62.592	32	10	1	0.511247	0.159765	0.0159765	0.0240738	0.0123077	0.00384615	0.000384615	0	0.03125	0.3125
	215028	61.61	36	29	8	0.584321	0.470703	0.129849	0.0236962	0.0138462	0.0111538	0.00307692	3.625	0.222222	0.805556
	155761	60.48	54	23	6	0.892857	0.380291	0.0992063	0.0232615	0.0207692	0.00884615	0.00230769	3.83333	0.111111	0.425926
	204446	59.162	37	27	7	0.625401	0.456374	0.118319	0.0227546	0.0142308	0.0103846	0.00269231	0	0.189189	0.72973
	204311	58.075	32	43	11	0.551012	0.740422	0.18941	0.0223365	0.0123077	0.0165385	0.00423077	3.90909	0.34375	1.34375
	186729	55.911	46			0.822736	0	0	0.0215042	0.0176923	0	0	0	0	0
	190253	53.867	38	29	8	0.705441	0.538363	0.148514	0.0207181	0.0146154	0.0111538	0.00307692	3.625	0.210526	0.763158
	266869	53.236	32	37	7	0.601097	0.695018	0.13149	0.0204754	0.0123077	0.0142308	0.00269231	5.28571	0.21875	1.15625
	276344	51.838	39	18	5	0.752344	0.347236	0.0964543	0.0199377	0.015	0.00692308	0.00192308	3.6	0.128205	0.461538
	123078	50.766	22			0.433361	0	0	0.0195254	0.00846154	0	0	0	0	0
	191844	50.722	29	24	6	0.571744	0.473167	0.118292	0.0195085	0.0111538	0.00923077	0.00230769	0	0.206897	0.827586
	69801	50.463	52	22	4	1.03046	0.435963	0.079266	0.0194088	0.02	0.00846154	0.00153846	5.5	0.0769231	0.423077
	208693	50.244	42	20	5	0.835921	0.398057	0.0995144	0.0193246	0.0161538	0.00769231	0.00192308	4	0.119048	0.47619
	348783	49.912	38	26	7	0.76134	0.520917	0.140247	0.0191969	0.0146154	0.01	0.00269231	3.71429	0.184211	0.684211
	219338	49.834	19	6	2	0.381266	0.1204	0.0401332	0.0191669	0.00730769	0.00230769	0.000769231	0	0.105263	0.315789
	222011	48.78	36	18	6	0.738007	0.369004	0.123001	0.0187615	0.0138462	0.00692308	0.00230769	0	0.166667	0.5
	260683	46.715	46	24	5	0.984694	0.513754	0.107032	0.0179673	0.0176923	0.00923077	0.00192308	0	0.108696	0.521739
	213643	46.431	32	32	8	0.689195	0.689195	0.172299	0.0178581	0.0123077	0.0123077	0.00307692	4	0.25	1
	290368	45.752	11	14	4	0.240427	0.305998	0.0874279	0.0175969	0.00423077	0.00538462	0.00153846	3.5	0.363636	1.27273
	200977	45.553	43	19	5	0.943955	0.417097	0.109762	0.0175204	0.0165385	0.00730769	0.00192308	3.8	0.116279	0.44186
	218020	45.08	31	49	13	0.687666	1.08696	0.288376	0.0173385	0.0119231	0.0188462	0.005	3.76923	0.419355	1.58065
	218138	44.994	13	25	5	0.288927	0.55563	0.111126	0.0173054	0.005	0.00961538	0.00192308	5	0.384615	1.92308
	244863	44.893	33	20	5	0.735081	0.445504	0.111376	0.0172665	0.0126923	0.00769231	0.00192308	4	0.151515	0.606061
	201373	44.741	20	18	4	0.447017	0.402316	0.0894035	0.0172081	0.00769231	0.00692308	0.00153846	4.5	0.2	0.9
	261612	44.288	35	34	10	0.790282	0.767702	0.225795	0.0170338	0.0134615	0.0130769	0.00384615	3.4	0.285714	0.971429
	237362	42.521	31			0.729052	0	0	0.0163542	0.0119231	0	0	0	0	0
	221901	41.502	25	22	7	0.602381	0.530095	0.168667	0.0159623	0.00961538	0.00846154	0.00269231	3.14286	0.28	0.88
	153851	39.581	2	106	15	0.0505293	2.67805	0.37897	0.0152235	0.000769231	0.0407692	0.00576923	0	7.5	53
	214560	38.73	25	15	4	0.645494	0.387297	0.103279	0.0148962	0.00961538	0.00576923	0.00153846	3.75	0.16	0.6
	147103	38.605	15	8	2	0.388551	0.207227	0.0518068	0.0148481	0.00576923	0.00307692	0.000769231	4	0.133333	0.533333
	215889	38.342	26	13	3	0.678108	0.339054	0.0782432	0.0147469	0.01	0.005	0.00115385	4.33333	0.115385	0.5
	214462	38.326	32	13	4	0.834942	0.339195	0.104368	0.0147408	0.0123077	0.005	0.00153846	0	0.125	0.40625
	348890	38.188	9			0.235676	0	0	0.0146877	0.00346154	0	0	0	0	0
	209089	37.146	22	20	6	0.592258	0.538416	0.161525	0.0142869	0.00846154	0.00769231	0.00230769	3.33333	0.272727	0.909091
	195585	36.652	31	10	3	0.845793	0.272836	0.0818509	0.0140969	0.0119231	0.00384615	0.00115385	3.33333	0.0967742	0.322581
	214758	36.475	30	23	5	0.822481	0.630569	0.13708	0.0140288	0.0115385	0.00884615	0.00192308	4.6	0.166667	0.766667
	168292	36.381	38			1.0445	0	0	0.0139927	0.0146154	0	0	0	0	0
	132722	36.216	33	31	8	0.911199	0.855975	0.220897	0.0139292	0.0126923	0.0119231	0.00307692	3.875	0.242424	0.939394
	129882	35.767	18	13	3	0.503257	0.363464	0.0838762	0.0137565	0.00692308	0.005	0.00115385	0	0.166667	0.722222
	260442	35.641	38	11	3	1.06619	0.308633	0.0841727	0.0137081	0.0146154	0.00423077	0.00115385	3.66667	0.0789474	0.289474
	352156	35.593	15	18	4	0.421431	0.505717	0.112382	0.0136896	0.00576923	0.00692308	0.00153846	4.5	0.266667	1.2
	215375	35.506	24	19	5	0.675942	0.535121	0.140821	0.0136562	0.00923077	0.00730769	0.00192308	3.8	0.208333	0.791667
	202658	35.282	15	51	11	0.425146	1.4455	0.311774	0.01357	0.00576923	0.0196154	0.00423077	4.63636	0.733333	3.4
	183482	34.855	26	30	5	0.745947	0.860709	0.143451	0.0134058	0.01	0.0115385	0.00192308	6	0.192308	1.15385
	298285	34.778	6	6	2	0.172523	0.172523	0.0575076	0.0133762	0.00230769	0.00230769	0.000769231	0	0.333333	1
	215714	34.587	21	22	5	0.607165	0.636077	0.144563	0.0133027	0.00807692	0.00846154	0.00192308	4.4	0.238095	1.04762
	351899	34.183	11	4	1	0.321797	0.117017	0.0292543	0.0131473	0.00423077	0.00153846	0.000384615	4	0.0909091	0.363636
	206781	32.384	19	12	3	0.586709	0.370553	0.0926383	0.0124554	0.00730769	0.00461538	0.00115385	0	0.157895	0.631579
	195641	31.963	9	8	2	0.281576	0.250289	0.0625723	0.0122935	0.00346154	0.00307692	0.000769231	4	0.222222	0.888889
	245177	31.794	36	22	6	1.13229	0.691954	0.188715	0.0122285	0.0138462	0.00846154	0.00230769	3.66667	0.166667	0.611111
	188428	31.762	15			0.472262	0	0	0.0122162	0.00576923	0	0	0	0	0
	139767	31.115	18	8	2	0.578499	0.257111	0.0642777	0.0119673	0.00692308	0.00307692	0.000769231	4	0.111111	0.444444
	226160	30.89	26	13	4	0.841696	0.420848	0.129492	0.0118808	0.01	0.005	0.00153846	3.25	0.153846	0.5
	178413	29.177	18	44	6	0.616924	1.50804	0.205641	0.0112219	0.00692308	0.0169231	0.00230769	0	0.333333	2.44444
	268426	28.684	16			0.557802	0	0	0.0110323	0.00615385	0	0	0	0	0
	269065	28.625	19	3	1	0.663755	0.104803	0.0349345	0.0110096	0.00730769	0.00115385	0.000384615	3	0.0526316	0.157895
	200164	28.082	9			0.32049	0	0	0.0108008	0.00346154	0	0	0	0	0
	221273	27.596	19	21	6	0.688506	0.76098	0.217423	0.0106138	0.00730769	0.00807692	0.00230769	3.5	0.315789	1.10526
	117904	27.505	14			0.508998	0	0	0.0105788	0.00538462	0	0	0	0	0
	225234	27.375	18	13	3	0.657534	0.474886	0.109589	0.0105288	0.00692308	0.005	0.00115385	0	0.166667	0.722222
	290382	27.174	15			0.551998	0	0	0.0104515	0.00576923	0	0	0	0	0
	235144	27.1	5	6	2	0.184502	0.221402	0.0738007	0.0104231	0.00192308	0.00230769	0.000769231	3	0.4	1.2
	273424	27.026	21	7	2	0.77703	0.25901	0.0740028	0.0103946	0.00807692	0.00269231	0.000769231	3.5	0.0952381	0.333333
	259774	26.96	33	21	6	1.22404	0.778932	0.222552	0.0103692	0.0126923	0.00807692	0.00230769	3.5	0.181818	0.636364
	159556	26.76	27	12	3	1.00897	0.44843	0.112108	0.0102923	0.0103846	0.00461538	0.00115385	0	0.111111	0.444444
	278177	26.553	12			0.451926	0	0	0.0102127	0.00461538	0	0	0	0	0
	365910	26.353	14			0.531249	0	0	0.0101358	0.00538462	0	0	0	0	0
	185408	25.744	19	24	6	0.738036	0.932256	0.233064	0.00990154	0.00730769	0.00923077	0.00230769	4	0.315789	1.26316
	121809	24.564	8	5	2	0.32568	0.20355	0.08142	0.00944769	0.00307692	0.00192308	0.000769231	0	0.25	0.625
	277939	24.484	10			0.40843	0	0	0.00941692	0.00384615	0	0	0	0	0
	245482	24.117	2	6	1	0.0829291	0.248787	0.0414645	0.00927577	0.000769231	0.00230769	0.000384615	6	0.5	3
	216156	24.024	18	24	6	0.749251	0.999001	0.24975	0.00924	0.00692308	0.00923077	0.00230769	4	0.333333	1.33333
	227977	23.887	17	20	5	0.711684	0.837276	0.209319	0.00918731	0.00653846	0.00769231	0.00192308	4	0.294118	1.17647
	225454	23.745	14	17	5	0.589598	0.71594	0.210571	0.00913269	0.00538462	0.00653846	0.00192308	3.4	0.357143	1.21429
	271938	23.624	12	3	1	0.507958	0.12699	0.0423298	0.00908615	0.00461538	0.00115385	0.000384615	3	0.0833333	0.25
	254967	23.272	20			0.859402	0	0	0.00895077	0.00769231	0	0	0	0	0
	183406	23.238	11	11	3	0.473363	0.473363	0.129099	0.00893769	0.00423077	0.00423077	0.00115385	0	0.272727	1
	216250	22.927	19	15	4	0.828717	0.65425	0.174467	0.00881808	0.00730769	0.00576923	0.00153846	3.75	0.210526	0.789474
	162231	22.061	18	16	4	0.815919	0.725262	0.181315	0.008485	0.00692308	0.00615385	0.00153846	4	0.222222	0.888889
	154941	21.975	11	5	1	0.500569	0.227531	0.0455063	0.00845192	0.00423077	0.00192308	0.000384615	5	0.0909091	0.454545
	227598	21.875	8	33	6	0.365714	1.50857	0.274286	0.00841346	0.00307692	0.0126923	0.00230769	5.5	0.75	4.125
	246218	21.69	15	21	3	0.691563	0.968188	0.138313	0.00834231	0.00576923	0.00807692	0.00115385	7	0.2	1.4
	153607	21.602	13	9	3	0.601796	0.416628	0.138876	0.00830846	0.005	0.00346154	0.00115385	3	0.230769	0.692308
	152572	21.425	14	8	3	0.653442	0.373396	0.140023	0.00824038	0.00538462	0.00307692	0.00115385	2.66667	0.214286	0.571429
	227796	21.366	17	16	4	0.795657	0.748853	0.187213	0.00821769	0.00653846	0.00615385	0.00153846	4	0.235294	0.941176
	255047	21.356	12	10	2	0.561903	0.468252	0.0936505	0.00821385	0.00461538	0.00384615	0.000769231	5	0.166667	0.833333
	262544	21.316	16	12	3	0.75061	0.562957	0.140739	0.00819846	0.00615385	0.00461538	0.00115385	4	0.1875	0.75
	266395	21.306	12	6	2	0.563222	0.281611	0.0938703	0.00819462	0.00461538	0.00230769	0.000769231	3	0.166667	0.5
	266995	21.116	17			0.805077	0	0	0.00812154	0.00653846	0	0	0	0	0
	273065	20.032	12	16	5	0.599042	0.798722	0.249601	0.00770462	0.00461538	0.00615385	0.00192308	3.2	0.416667	1.33333
	277139	19.963	14	7	2	0.701297	0.350649	0.100185	0.00767808	0.00538462	0.00269231	0.000769231	3.5	0.142857	0.5
	133466	19.778	13	13	3	0.657296	0.657296	0.151684	0.00760692	0.005	0.005	0.00115385	0	0.230769	1
	131881	19.404	1			0.0515358	0	0	0.00746308	0.000384615	0	0	0	0	0
	189540	19.404	12	14	3	0.618429	0.721501	0.154607	0.00746308	0.00461538	0.00538462	0.00115385	4.66667	0.25	1.16667
	233381	19.321	12			0.621086	0	0	0.00743115	0.00461538	0	0	0	0	0
	141250	18.985	10			0.526732	0	0	0.00730192	0.00384615	0	0	0	0	0
	270297	18.903	8	13	3	0.423213	0.687722	0.158705	0.00727038	0.00307692	0.005	0.00115385	4.33333	0.375	1.625
	263196	18.887	12	12	3	0.635358	0.635358	0.158839	0.00726423	0.00461538	0.00461538	0.00115385	4	0.25	1
	254711	18.657	15	44	10	0.803988	2.35836	0.535992	0.00717577	0.00576923	0.0169231	0.00384615	0	0.666667	2.93333
	263189	18.616	8	4	1	0.429738	0.214869	0.0537172	0.00716	0.00307692	0.00153846	0.000384615	4	0.125	0.5
	266320	18.566	6	41	10	0.323171	2.20834	0.538619	0.00714077	0.00230769	0.0157692	0.00384615	4.1	1.66667	6.83333
	115385	18.561	12	7	2	0.646517	0.377135	0.107753	0.00713885	0.00461538	0.00269231	0.000769231	3.5	0.166667	0.583333
	266804	18.218	6	12	4	0.329345	0.658689	0.219563	0.00700692	0.00230769	0.00461538	0.00153846	3	0.666667	2
	277149	18.197	12	10	3	0.659449	0.549541	0.164862	0.00699885	0.00461538	0.00384615	0.00115385	3.33333	0.25	0.833333
	187418	18.167	13	3	1	0.715583	0.165135	0.0550449	0.00698731	0.005	0.00115385	0.000384615	3	0.0769231	0.230769
	134441	17.282	5			0.289318	0	0	0.00664692	0.00192308	0	0	0	0	0
	272387	17.136	8			0.466853	0	0	0.00659077	0.00307692	0	0	0	0	0
	290394	16.575	3	15	3	0.180995	0.904977	0.180995	0.006375	0.00115385	0.00576923	0.00115385	5	1	5
	293646	16.447	15	8	2	0.91202	0.486411	0.121603	0.00632577	0.00576923	0.00307692	0.000769231	4	0.133333	0.533333
	181528	16.24	5			0.307882	0	0	0.00624615	0.00192308	0	0	0	0	0
	123738	16.172	3	23	5	0.185506	1.42221	0.309176	0.00622	0.00115385	0.00884615	0.00192308	4.6	1.66667	7.66667
	245474	16.147	5	12	2	0.309655	0.743172	0.123862	0.00621038	0.00192308	0.00461538	0.000769231	6	0.4	2.4
	290568	16.078	7			0.435378	0	0	0.00618385	0.00269231	0	0	0	0	0
	118802	16.034	4			0.24947	0	0	0.00616692	0.00153846	0	0	0	0	0
	140693	15.624	17	6	1	1.08807	0.384025	0.0640041	0.00600923	0.00653846	0.00230769	0.000384615	6	0.0588235	0.352941
	263637	15.569	7	4	1	0.449611	0.256921	0.0642302	0.00598808	0.00269231	0.00153846	0.000384615	4	0.142857	0.571429
	141939	15.512	11	6	2	0.709128	0.386797	0.128932	0.00596615	0.00423077	0.00230769	0.000769231	3	0.181818	0.545455
	269017	15.248	12	9	3	0.786988	0.590241	0.196747	0.00586462	0.00461538	0.00346154	0.00115385	3	0.25	0.75
	275366	15.063	3	13	3	0.199164	0.863042	0.199164	0.00579346	0.00115385	0.005	0.00115385	0	1	4.33333
	314452	14.419	4			0.277412	0	0	0.00554577	0.00153846	0	0	0	0	0
	228158	14.26	8	23	5	0.56101	1.6129	0.350631	0.00548462	0.00307692	0.00884615	0.00192308	4.6	0.625	2.875
	186414	14.038	15	8	2	1.06853	0.569882	0.14247	0.00539923	0.00576923	0.00307692	0.000769231	4	0.133333	0.533333
	118310	13.849	6	3	1	0.433244	0.216622	0.0722074	0.00532654	0.00230769	0.00115385	0.000384615	3	0.166667	0.5
	130936	13.535	4			0.29553	0	0	0.00520577	0.00153846	0	0	0	0	0
	258930	13.378	6	8	2	0.448498	0.597997	0.149499	0.00514538	0.00230769	0.00307692	0.000769231	4	0.333333	1.33333
	256489	12.894	9	7	2	0.697999	0.542888	0.155111	0.00495923	0.00346154	0.00269231	0.000769231	3.5	0.222222	0.777778
	367098	12.868	2			0.155424	0	0	0.00494923	0.000769231	0	0	0	0	0
	258637	12.849	10	17	5	0.778271	1.32306	0.389135	0.00494192	0.00384615	0.00653846	0.00192308	3.4	0.5	1.7
	165842	12.614	8	22	5	0.634216	1.74409	0.396385	0.00485154	0.00307692	0.00846154	0.00192308	4.4	0.625	2.75
	278088	12.119	7			0.577605	0	0	0.00466115	0.00269231	0	0	0	0	0
	214242	11.82	10	4	1	0.846024	0.338409	0.0846024	0.00454615	0.00384615	0.00153846	0.000384615	4	0.1	0.4
	203961	11.526	7	4	1	0.607323	0.347041	0.0867604	0.00443308	0.00269231	0.00153846	0.000384615	4	0.142857	0.571429
	176891	11.389	11	6	2	0.965844	0.526824	0.175608	0.00438038	0.00423077	0.00230769	0.000769231	3	0.181818	0.545455
	160604	11.286		36	7	0	3.18979	0.620237	0.00434077	0	0.0138462	0.00269231	0	0	0
	269084	10.798	7	11	3	0.648268	1.01871	0.277829	0.00415308	0.00269231	0.00423077	0.00115385	3.66667	0.428571	1.57143
	244784	10.392	2	4	1	0.192456	0.384911	0.0962279	0.00399692	0.000769231	0.00153846	0.000384615	4	0.5	2
	270532	10.343	6	2	1	0.580102	0.193367	0.0966837	0.00397808	0.00230769	0.000769231	0.000384615	0	0.166667	0.333333
	272920	10.343	6	7	2	0.580102	0.676786	0.193367	0.00397808	0.00230769	0.00269231	0.000769231	3.5	0.333333	1.16667
	141177	10.297	4	4	1	0.388463	0.388463	0.0971157	0.00396038	0.00153846	0.00153846	0.000384615	0	0.25	1
	206144	10.22	4			0.391389	0	0	0.00393077	0.00153846	0	0	0	0	0
	367031	10.034	5	13	2	0.498306	1.29559	0.199322	0.00385923	0.00192308	0.005	0.000769231	0	0.4	2.6
	272569	9.93	11	7	2	1.10775	0.704935	0.20141	0.00381923	0.00423077	0.00269231	0.000769231	3.5	0.181818	0.636364
	273306	9.516	11	15	3	1.15595	1.57629	0.315259	0.00366	0.00423077	0.00576923	0.00115385	0	0.272727	1.36364
	140647	9.454	4	4	1	0.423101	0.423101	0.105775	0.00363615	0.00153846	0.00153846	0.000384615	4	0.25	1
	275340	9.371	6	4	1	0.640273	0.426849	0.106712	0.00360423	0.00230769	0.00153846	0.000384615	4	0.166667	0.666667
	273388	8.713	2	2	1	0.229542	0.229542	0.114771	0.00335115	0.000769231	0.000769231	0.000384615	2	0.5	1
	268595	8.658	2	3	1	0.231	0.3465	0.1155	0.00333	0.000769231	0.00115385	0.000384615	3	0.5	1.5
	274134	8.56	4	4	1	0.46729	0.46729	0.116822	0.00329231	0.00153846	0.00153846	0.000384615	4	0.25	1
	352183	8.462	8			0.945403	0	0	0.00325462	0.00307692	0	0	0	0	0
	275787	8.174	7			0.856374	0	0	0.00314385	0.00269231	0	0	0	0	0
	275374	8.119	4			0.492672	0	0	0.00312269	0.00153846	0	0	0	0	0
	274113	7.412	1	6	1	0.134916	0.809498	0.134916	0.00285077	0.000384615	0.00230769	0.000384615	0	1	6
	147008	7.165	4			0.558269	0	0	0.00275577	0.00153846	0	0	0	0	0
	219727	7.043	4			0.56794	0	0	0.00270885	0.00153846	0	0	0	0	0
	349428	6.497	4			0.615669	0	0	0.00249885	0.00153846	0	0	0	0	0
	272872	3.905	3	3	1	0.768246	0.768246	0.256082	0.00150192	0.00115385	0.00115385	0.000384615	3	0.333333	1
	365817	3.485		3	1	0	0.860832	0.286944	0.00134038	0	0.00115385	0.000384615	3	0	0
	367019	2.314		9	2	0	3.88937	0.864304	0.00089	0	0.00346154	0.000769231	0	0	0
n	221
SUM		14411.2	9018	6749	1572	130.94	112.082	26.9143	5.54278	3.46846	2.59577	0.604615
mean						0.592489	0.507158	0.121784	0.0250804	0.0156944	0.0117456	0.00273582	2.63521	0.241947	1.10791
STDV						0.23109	0.508066	0.109647	0.0368066	0.0247359	0.0200625	0.00442605	2.07325	0.538832	3.65626
SEM						0.0155448	0.0341762	0.00737567	0.00247588	0.00166391	0.00134955	0.000297729	0.139462	0.0362458	0.245947

## Sheet: all neurons
				inputs/length (µm)	outputs/length (µm)	T-bars/length (µm)	innervation density	input/µm^3	output/µm^3	T-bar/µm^3	poliadicity	T-bar/post	outputs/post							inputs/length (µm)	outputs/length (µm)	T-bars/length (µm)	innervation density	input/µm^3	output/µm^3	T-bar/µm^3	polyadicity	T-bar/post	outputs/post
				0.356792	2.79487	0.386525	0.0420413	0.015	0.1175	0.01625	7.23077	1.08333	7.83333							0.192345	1.82727	0.192345	0.00399923	0.000769231	0.00730769	0.000769231	9.5	1	9.5
				0.663597	4.60496	0.80436	0.0310806	0.020625	0.143125	0.025	5.725	1.21212	6.93939							0.342313	4.21045	0.51347	0.0112358	0.00384615	0.0473077	0.00576923	8.2	1.5	12.3
				0.418473	4.84233	0.6576	0.0209094	0.00875	0.10125	0.01375	7.36364	1.57143	11.5714							0.392073	1.98413	0.403954	0.0323723	0.0126923	0.0642308	0.0130769	4.91176	1.0303	5.06061
				0.435256	4.679	0.652884	0.022975	0.01	0.1075	0.015	7.16667	1.5	10.75							0.213025	1.6129	0.365186	0.0252769	0.00538462	0.0407692	0.00923077	4.41667	1.71429	7.57143
				0.256823	2.56823	0.396909	0.0267694	0.006875	0.06875	0.010625	6.47059	1.54545	10							0.399473	2.54664	0.519315	0.0385123	0.0153846	0.0980769	0.02	4.90385	1.3	6.375
				0.454921	3.84615	0.641026	0.030225	0.01375	0.11625	0.019375	6	1.40909	8.45455							0.440946	3.41084	0.531729	0.0296565	0.0130769	0.101154	0.0157692	6.41463	1.20588	7.73529
				0.231303	2.00463	0.346955	0.0162125	0.00375	0.0325	0.005625	5.77778	1.5	8.66667							0.543686	2.56805	0.543686	0.0332488	0.0180769	0.0853846	0.0180769	4.7234	1	4.7234
				0.286721	3.42017	0.471041	0.0305175	0.00875	0.104375	0.014375	7.26087	1.64286	11.9286							0.416072	3.56633	0.54981	0.0258831	0.0107692	0.0923077	0.0142308	6.48649	1.32143	8.57143
				0.476624	3.96464	0.628277	0.0288487	0.01375	0.114375	0.018125	6.31034	1.31818	8.31818							0.579151	3.70305	0.508951	0.0219154	0.0126923	0.0811538	0.0111538	7.27586	0.878788	6.39394
				0.302141	2.71927	0.453211	0.02896	0.00875	0.07875	0.013125	6	1.5	9							0.372958	3.33176	0.484845	0.0309377	0.0115385	0.103077	0.015	6.87179	1.3	8.93333
				0.542373	2.0339	0.372881	0.0184375	0.01	0.0375	0.006875	5.45455	0.6875	3.75							0.383537	5.1335	0.826081	0.0130365	0.005	0.0669231	0.0107692	6.21429	2.15385	13.3846
				0.413993	6.41689	0.724488	0.0120775	0.005	0.0775	0.00875	8.85714	1.75	15.5							0.256653	2.43263	0.401718	0.0344673	0.00884615	0.0838462	0.0138462	6.05556	1.56522	9.47826
				0.346899	2.70216	0.41993	0.0342319	0.011875	0.0925	0.014375	6.43478	1.21053	7.78947							0.525422	2.81976	0.542936	0.0219604	0.0115385	0.0619231	0.0119231	5.19355	1.03333	5.36667
				0.598036	2.97357	0.564812	0.0376231	0.0225	0.111875	0.02125	5.26471	0.944444	4.97222							0.495802	2.80955	0.60598	0.0349085	0.0173077	0.0980769	0.0211538	4.63636	1.22222	5.66667
				0.600279	3.6179	0.64895	0.0385237	0.023125	0.139375	0.025	5.575	1.08108	6.02703							0.519683	1.70341	0.317584	0.0266435	0.0138462	0.0453846	0.00846154	5.36364	0.611111	3.27778
				0.27293	2.45637	0.392337	0.0366394	0.01	0.09	0.014375	6.26087	1.4375	9							0.146001	2.11702	0.438004	0.0105373	0.00153846	0.0223077	0.00461538	4.83333	3	14.5
				0.438651	2.83557	0.516982	0.039895	0.0175	0.113125	0.020625	5.48485	1.17857	6.46429							0.294464	2.60487	0.339766	0.01698	0.005	0.0442308	0.00576923	7.66667	1.15385	8.84615
				0.510703	3.33067	0.510703	0.0281475	0.014375	0.09375	0.014375	6.52174	1	6.52174							0.658071	2.51042	0.48746	0.0157804	0.0103846	0.0396154	0.00769231	5.15	0.740741	3.81481
				0.392223	3.41794	0.560318	0.0111544	0.004375	0.038125	0.00625	6.1	1.42857	8.71429							0.380089	2.37176	0.380089	0.0252977	0.00961538	0.06	0.00961538	6.24	1	6.24
				0.513809	3.2113	0.556626	0.0145969	0.0075	0.046875	0.008125	5.76923	1.08333	6.25							0.481223	2.90585	0.6478	0.0207804	0.01	0.0603846	0.0134615	4.48571	1.34615	6.03846
				0.338174	2.53631	0.356962	0.0332669	0.01125	0.084375	0.011875	7.10526	1.05556	7.5							0.47887	0.92509	0.185018	0.0353396	0.0169231	0.0326923	0.00653846	5	0.386364	1.93182
				0.361238	2.05748	0.329826	0.0397938	0.014375	0.081875	0.013125	6.2381	0.913043	5.69565							0.290867	3.24109	0.664838	0.00925615	0.00269231	0.03	0.00615385	4.875	2.28571	11.1429
				0.371458	3.13086	0.406835	0.0353337	0.013125	0.110625	0.014375	7.69565	1.09524	8.42857							0.574163	2.60287	0.535885	0.0100481	0.00576923	0.0261538	0.00538462	4.85714	0.933333	4.53333
				0.619649	4.17448	0.766408	0.0383281	0.02375	0.16	0.029375	5.44681	1.23684	6.73684							0.433856	1.62224	0.377266	0.0203896	0.00884615	0.0330769	0.00769231	4.3	0.869565	3.73913
				0.386366	3.60608	0.515154	0.0291175	0.01125	0.105	0.015	7	1.33333	9.33333							0.525723	2.07786	0.425585	0.0153635	0.00807692	0.0319231	0.00653846	4.88235	0.809524	3.95238
				0.241916	2.41916	0.483832	0.00775062	0.001875	0.01875	0.00375	5	2	10							0.431785	2.06959	0.461564	0.0258319	0.0111538	0.0534615	0.0119231	4.48387	1.06897	4.7931
				0.348969	3.0244	0.494373	0.0214919	0.0075	0.065	0.010625	6.11765	1.41667	8.66667							0.37176	3.41343	0.540741	0.0227608	0.00846154	0.0776923	0.0123077	6.3125	1.45455	9.18182
				0.61334	5.18784	0.664452	0.0244563	0.015	0.126875	0.01625	7.80769	1.08333	8.45833							0.394276	1.98203	0.383619	0.0360935	0.0142308	0.0715385	0.0138462	5.16667	0.972973	5.02703
				0.509228	3.12418	0.56428	0.0454119	0.023125	0.141875	0.025625	5.53659	1.10811	6.13514							0.306513	0.574713	0.166028	0.0301154	0.00923077	0.0173077	0.005	3.46154	0.541667	1.875
				0.366892	3.81567	0.587027	0.0085175	0.003125	0.0325	0.005	6.5	1.6	10.4							0.283805	2.54005	0.425707	0.0271042	0.00769231	0.0688462	0.0115385	5.96667	1.5	8.95
				0.407332	3.05499	0.712831	0.0061375	0.0025	0.01875	0.004375	4.28571	1.75	7.5							0.381277	3.26809	0.50837	0.0211838	0.00807692	0.0692308	0.0107692	6.42857	1.33333	8.57143
				0.401464	3.44787	0.543157	0.0264656	0.010625	0.09125	0.014375	6.34783	1.35294	8.58824							0.424101	1.36107	0.266296	0.0389965	0.0165385	0.0530769	0.0103846	5.11111	0.627907	3.2093
				0.391059	3.95176	0.514552	0.0303662	0.011875	0.12	0.015625	7.68	1.31579	10.1053							0.553121	2.5245	0.496391	0.0271188	0.015	0.0684615	0.0134615	5.08571	0.897436	4.5641
				0.486345	3.56653	0.618985	0.0424081	0.020625	0.15125	0.02625	5.7619	1.27273	7.33333							0.270226	2.58336	0.410744	0.0355827	0.00961538	0.0919231	0.0146154	6.28947	1.52	9.56
				0.545278	4.28432	0.623174	0.0320938	0.0175	0.1375	0.02	6.875	1.14286	7.85714							0.366412	2.20894	0.439694	0.0367388	0.0134615	0.0811538	0.0161538	5.02381	1.2	6.02857
				0.363217	3.90992	0.512777	0.0292525	0.010625	0.114375	0.015	7.625	1.41176	10.7647							0.454587	2.18202	0.454587	0.00846077	0.00384615	0.0184615	0.00384615	4.8	1	4.8
				0.42518	2.4566	0.484233	0.0529188	0.0225	0.13	0.025625	5.07317	1.13889	5.77778							0.255247	2.12052	0.333785	0.0195888	0.005	0.0415385	0.00653846	6.35294	1.30769	8.30769
				0.435532	2.77652	0.453679	0.0344406	0.015	0.095625	0.015625	6.12	1.04167	6.375							0.303716	4.03114	0.635043	0.01393	0.00423077	0.0561538	0.00884615	6.34783	2.09091	13.2727
				0.488948	3.27089	0.59011	0.0370694	0.018125	0.12125	0.021875	5.54286	1.2069	6.68966							0.400954	2.72227	0.44316	0.0182258	0.00730769	0.0496154	0.00807692	6.14286	1.10526	6.78947
				0.227502	2.34002	0.406253	0.0384612	0.00875	0.09	0.015625	5.76	1.78571	10.2857							0.42059	3.64512	0.537421	0.0164604	0.00692308	0.06	0.00884615	6.78261	1.27778	8.66667
				0.269978	2.83477	0.404968	0.00463	0.00125	0.013125	0.001875	7	1.5	10.5							0.405344	2.6854	0.422233	0.0227727	0.00923077	0.0611538	0.00961538	6.36	1.04167	6.625
				0.432916	3.82409	0.631336	0.0346487	0.015	0.1325	0.021875	6.05714	1.45833	8.83333							0.388128	3.10503	0.452817	0.0297285	0.0115385	0.0923077	0.0134615	6.85714	1.16667	8
				0.473323	3.82445	0.586921	0.0330112	0.015625	0.12625	0.019375	6.51613	1.24	8.08							0.330161	2.8355	0.427267	0.0198038	0.00653846	0.0561538	0.00846154	6.63636	1.29412	8.58824
				0.528953	3.3686	0.473274	0.02245	0.011875	0.075625	0.010625	7.11765	0.894737	6.36842							0.233901	1.67329	0.377841	0.0213765	0.005	0.0357692	0.00807692	4.42857	1.61538	7.15385
				0.831279	0.318979	0.0676623	0.129319	0.1075	0.04125	0.00875	4.71429	0.0813953	0.383721							0.239082	2.31113	0.478164	0.00482615	0.00115385	0.0111538	0.00230769	4.83333	2	9.66667
				0.870117	0.377704	0.0671473	0.223389	0.194375	0.084375	0.015	5.625	0.0771704	0.434084							0.329009	4.13612	0.70502	0.00818308	0.00269231	0.0338462	0.00576923	5.86667	2.14286	12.5714
				0.840598	0.432981	0.0839391	1.03498	0.87	0.448125	0.086875	5.15827	0.0998563	0.515086							0.788618	0.619728	0.120037	1.92888	1.52115	1.19538	0.231538	5.16279	0.152212	0.785841
				0.852995	0.265616	0.0539871	0.289421	0.246875	0.076875	0.015625	4.92	0.0632911	0.311392							0.775377	0.559428	0.0986225	0.226193	0.175385	0.126538	0.0223077	5.67241	0.127193	0.721491
				0.86289	0.275046	0.0539306	0.347669	0.3	0.095625	0.01875	5.1	0.0625	0.31875							0.72184	0.519725	0.111645	0.19981	0.144231	0.103846	0.0223077	4.65517	0.154667	0.72
				0.817725	0.303402	0.0624651	0.77043	0.63	0.23375	0.048125	4.85714	0.0763889	0.371032							0.639137	0.0602959	0.0120592	0.0956819	0.0611538	0.00576923	0.00115385	5	0.0188679	0.0943396
				0.716762	0.311153	0.0722319	0.112485	0.080625	0.035	0.008125	4.30769	0.100775	0.434109							0.64322	0.61029	0.14928	0.1752	0.112692	0.106923	0.0261538	4.08824	0.232082	0.948805
				0.547445	0.615876	0.182482	0.0274	0.015	0.016875	0.005	3.375	0.333333	1.125							0.636447	0.567418	0.128394	0.27859	0.177308	0.158077	0.0357692	4.41935	0.201735	0.89154
				0	2.23927	0.333508	0.0131181	0	0.029375	0.004375	6.71429	0	0							0.52791	0.367242	0.0918105	0.0335138	0.0176923	0.0123077	0.00307692	4	0.173913	0.695652
				0.827832	0.692239	0.192685	0.0875781	0.0725	0.060625	0.016875	3.59259	0.232759	0.836207							0.534234	0.237019	0.0489088	0.102231	0.0546154	0.0242308	0.005	4.84615	0.0915493	0.443662
				1.20237	0.510743	0.102858	0.176214	0.211875	0.09	0.018125	4.96552	0.0855457	0.424779							0.315321	0.315321	0.0934285	0.0329335	0.0103846	0.0103846	0.00307692	3.375	0.296296	1
				0.645809	0.645809	0.143513	0.00871	0.005625	0.005625	0.00125	4.5	0.222222	1							0.748042	0.645369	0.161342	0.0262223	0.0196154	0.0169231	0.00423077	4	0.215686	0.862745
				0.708404	0.503838	0.11933	0.329967	0.23375	0.16625	0.039375	4.22222	0.168449	0.71123							0.473363	0.473363	0.129099	0.00893769	0.00423077	0.00423077	0.00115385	0	0.272727	1
				0.884903	0.491348	0.100178	0.262034	0.231875	0.12875	0.02625	4.90476	0.113208	0.555256							0.421431	0.505717	0.112382	0.0136896	0.00576923	0.00692308	0.00153846	4.5	0.266667	1.2
				0.911984	0.623298	0.131221	0.0952594	0.086875	0.059375	0.0125	4.75	0.143885	0.683453							0.32568	0.20355	0.08142	0.00944769	0.00307692	0.00192308	0.000769231	0	0.25	0.625
				0.788436	0.734526	0.188686	0.0927469	0.073125	0.068125	0.0175	3.89286	0.239316	0.931624							0.0515358	0	0	0.00746308	0.000384615	0	0	0	0	0
				0.558505	0	0	0.165621	0.0925	0	0	0	0	0							0.192456	0.384911	0.0962279	0.00399692	0.000769231	0.00153846	0.000384615	4	0.5	2
				0.906542	0.611389	0.189741	0.0296456	0.026875	0.018125	0.005625	3.22222	0.209302	0.674419							0.0829291	0.248787	0.0414645	0.00927577	0.000769231	0.00230769	0.000384615	6	0.5	3
				0.480654	0	0	0.163839	0.07875	0	0	0	0	0							0.429738	0.214869	0.0537172	0.00716	0.00307692	0.00153846	0.000384615	4	0.125	0.5
				0.759121	0.330053	0.0858137	0.0946819	0.071875	0.03125	0.008125	3.84615	0.113043	0.434783							0.184502	0.221402	0.0738007	0.0104231	0.00192308	0.00230769	0.000769231	3	0.4	1.2
				0.822715	1.0868	0.253924	0.123068	0.10125	0.13375	0.03125	4.28	0.308642	1.32099							0.275171	0.206378	0.0687928	0.0279546	0.00769231	0.00576923	0.00192308	0	0.25	0.75
				0.321388	1.28555	0.321388	0.00388938	0.00125	0.005	0.00125	4	1	4							0.388551	0.207227	0.0518068	0.0148481	0.00576923	0.00307692	0.000769231	4	0.133333	0.533333
				0.696015	0.261006	0.0870019	0.00718375	0.005	0.001875	0.000625	3	0.125	0.375							0.379037	0.164249	0.0505382	0.0304415	0.0115385	0.005	0.00153846	3.25	0.133333	0.433333
				0.340495	1.43008	0.221322	0.0367113	0.0125	0.0525	0.008125	6.46154	0.65	4.2							0.67738	0.443801	0.105111	0.0329323	0.0223077	0.0146154	0.00346154	4.22222	0.155172	0.655172
				0.376044	0	0	0.0315788	0.011875	0	0	0	0	0							0.646517	0.377135	0.107753	0.00713885	0.00461538	0.00269231	0.000769231	3.5	0.166667	0.583333
				0.551388	0.239282	0.0728249	0.0600756	0.033125	0.014375	0.004375	3.28571	0.132075	0.433962							0.508998	0	0	0.0105788	0.00538462	0	0	0	0	0
				0.330688	0.661376	0.330688	0.00189	0.000625	0.00125	0.000625	2	1	2							0.433244	0.216622	0.0722074	0.00532654	0.00230769	0.00115385	0.000384615	3	0.166667	0.5
				0.946781	0.946781	0.149492	0.0125425	0.011875	0.011875	0.001875	6.33333	0.157895	1							0.24947	0	0	0.00616692	0.00153846	0	0	0	0	0
				0.546505	0.554202	0.11161	0.162396	0.08875	0.09	0.018125	4.96552	0.204225	1.01408							0.66563	0.88628	0.205941	0.104586	0.0696154	0.0926923	0.0215385	4.30357	0.309392	1.33149
				0.453985	0.713406	0.194565	0.00963687	0.004375	0.006875	0.001875	3.66667	0.428571	1.57143							0.722598	0.608504	0.167339	0.0505654	0.0365385	0.0307692	0.00846154	0	0.231579	0.842105
				0.436891	1.13592	0.218446	0.0143056	0.00625	0.01625	0.003125	5.2	0.5	2.6							0.503257	0.363464	0.0838762	0.0137565	0.00692308	0.005	0.00115385	0	0.166667	0.722222
				0.648118	1.66659	0.324059	0.0135006	0.00875	0.0225	0.004375	5.14286	0.5	2.57143							0.29553	0	0	0.00520577	0.00153846	0	0	0	0	0
				0.717349	0.70164	0.120431	0.119363	0.085625	0.08375	0.014375	5.82609	0.167883	0.978102							0.911199	0.855975	0.220897	0.0139292	0.0126923	0.0119231	0.00307692	3.875	0.242424	0.939394
				0.739932	0	0	0.0177381	0.013125	0	0	0	0	0							0.657296	0.657296	0.151684	0.00760692	0.005	0.005	0.00115385	0	0.230769	1
				0.262789	0	0	0.01427	0.00375	0	0	0	0	0							0.578499	0.257111	0.0642777	0.0119673	0.00692308	0.00307692	0.000769231	4	0.111111	0.444444
				0.634168	0.965038	0.193008	0.0226675	0.014375	0.021875	0.004375	5	0.304348	1.52174							0.423101	0.423101	0.105775	0.00363615	0.00153846	0.00153846	0.000384615	4	0.25	1
				1.41705	1.09004	0.327011	0.00573375	0.008125	0.00625	0.001875	3.33333	0.230769	0.769231							1.08807	0.384025	0.0640041	0.00600923	0.00653846	0.00230769	0.000384615	6	0.0588235	0.352941
				0.426298	0	0	0.013195	0.005625	0	0	0	0	0							0.388463	0.388463	0.0971157	0.00396038	0.00153846	0.00153846	0.000384615	0	0.25	1
				0.970403	0.799155	0.171248	0.0218981	0.02125	0.0175	0.00375	4.66667	0.176471	0.823529							0.526732	0	0	0.00730192	0.00384615	0	0	0	0	0
				0.614861	0.331079	0.094594	0.0132144	0.008125	0.004375	0.00125	3.5	0.153846	0.538462							0.709128	0.386797	0.128932	0.00596615	0.00423077	0.00230769	0.000769231	3	0.181818	0.545455
				0.64234	0.751674	0.191335	0.0457313	0.029375	0.034375	0.00875	3.92857	0.297872	1.17021							0.558269	0	0	0.00275577	0.00153846	0	0	0	0	0
				0.560224	0	0	0.0133875	0.0075	0	0	0	0	0							0.631497	0.534344	0.14573	0.0395885	0.025	0.0211538	0.00576923	3.66667	0.230769	0.846154
				0.57666	0.937072	0.144165	0.00867062	0.005	0.008125	0.00125	6.5	0.25	1.625							0.653442	0.373396	0.140023	0.00824038	0.00538462	0.00307692	0.00115385	2.66667	0.214286	0.571429
				0.513459	0.967672	0.256729	0.0316481	0.01625	0.030625	0.008125	3.76923	0.5	1.88462							0.601796	0.416628	0.138876	0.00830846	0.005	0.00346154	0.00115385	3	0.230769	0.692308
				1.04246	0.208493	0.0694975	0.00899312	0.009375	0.001875	0.000625	3	0.0666667	0.2							0.500569	0.227531	0.0455063	0.00845192	0.00423077	0.00192308	0.000384615	5	0.0909091	0.454545
				0.866718	0.660357	0.165089	0.04543	0.039375	0.03	0.0075	4	0.190476	0.761905							0.432187	0.904391	0.192083	0.0480562	0.0207692	0.0434615	0.00923077	4.70833	0.444444	2.09259
				0.0777061	0.310824	0.0777061	0.00804312	0.000625	0.0025	0.000625	4	1	4							0	3.18979	0.620237	0.00434077	0	0.0138462	0.00269231	0	0	0
				0.879676	0.573702	0.11474	0.0163413	0.014375	0.009375	0.001875	5	0.130435	0.652174							0.815919	0.725262	0.181315	0.008485	0.00692308	0.00615385	0.00153846	4	0.222222	0.888889
				0.362779	2.17667	0.362779	0.00344562	0.00125	0.0075	0.00125	6	1	6							0.634216	1.74409	0.396385	0.00485154	0.00307692	0.00846154	0.00192308	4.4	0.625	2.75
				0.738416	0.584579	0.153837	0.0203138	0.015	0.011875	0.003125	3.8	0.208333	0.791667							0.554604	0.322829	0.0910543	0.0464642	0.0257692	0.015	0.00423077	3.54545	0.164179	0.58209
				0.77918	0	0	0.0280744	0.021875	0	0	0	0	0							0.654691	0.378493	0.092066	0.0375985	0.0246154	0.0142308	0.00346154	4.11111	0.140625	0.578125
				0.804964	1.24099	0.301861	0.0186344	0.015	0.023125	0.005625	4.11111	0.375	1.54167							0.468906	0.418214	0.088712	0.0303488	0.0142308	0.0126923	0.00269231	4.71429	0.189189	0.891892
				0.847848	1.09009	0.290691	0.0516013	0.04375	0.05625	0.015	3.75	0.342857	1.28571							0.965844	0.526824	0.175608	0.00438038	0.00423077	0.00230769	0.000769231	3	0.181818	0.545455
				0.790063	0.768117	0.197516	0.0284788	0.0225	0.021875	0.005625	3.88889	0.25	0.972222							0.665642	0.507809	0.130383	0.0560477	0.0373077	0.0284615	0.00730769	0	0.195876	0.762887
				0.658436	0.499706	0.0940623	0.106312	0.07	0.053125	0.01	5.3125	0.142857	0.758929							0.307882	0	0	0.00624615	0.00192308	0	0	0	0	0
				0.422813	0.782987	0.125278	0.0399112	0.016875	0.03125	0.005	6.25	0.296296	1.85185							0.745947	0.860709	0.143451	0.0134058	0.01	0.0115385	0.00192308	6	0.192308	1.15385
				0.474501	0.515762	0.123783	0.030295	0.014375	0.015625	0.00375	4.16667	0.26087	1.08696							1.06853	0.569882	0.14247	0.00539923	0.00576923	0.00307692	0.000769231	4	0.133333	0.533333
				0.257069	0	0	0.00729375	0.001875	0	0	0	0	0							0.578978	0.543888	0.0701791	0.0438438	0.0253846	0.0238462	0.00307692	7.75	0.121212	0.939394
				0.326944	0	0	0.0152931	0.005	0	0	0	0	0							0.822736	0	0	0.0215042	0.0176923	0	0	0	0	0
				0.726681	0.784815	0.15987	0.0430038	0.03125	0.03375	0.006875	4.90909	0.22	1.08							0.618429	0.721501	0.154607	0.00746308	0.00461538	0.00538462	0.00115385	4.66667	0.25	1.16667
				0.670092	1.11682	0.319091	0.0195869	0.013125	0.021875	0.00625	3.5	0.47619	1.66667							0.692941	0.456711	0.118115	0.0488442	0.0338462	0.0223077	0.00576923	3.86667	0.170455	0.659091
				1.00746	1.04409	0.274761	0.0341206	0.034375	0.035625	0.009375	3.8	0.272727	1.03636							0.571744	0.473167	0.118292	0.0195085	0.0111538	0.00923077	0.00230769	0	0.206897	0.827586
				0.602138	0.752672	0.0752672	0.0166075	0.01	0.0125	0.00125	10	0.125	1.25							0.623047	0.59515	0.139488	0.04136	0.0257692	0.0246154	0.00576923	4.26667	0.223881	0.955224
				0.734646	0.971993	0.259952	0.0552987	0.040625	0.05375	0.014375	3.73913	0.353846	1.32308							0.845793	0.272836	0.0818509	0.0140969	0.0119231	0.00384615	0.00115385	3.33333	0.0967742	0.322581
				0.731422	0.195046	0.0487615	0.0128175	0.009375	0.0025	0.000625	4	0.0666667	0.266667							0.425146	1.4455	0.311774	0.01357	0.00576923	0.0196154	0.00423077	4.63636	0.733333	3.4
				0.696267	0	0	0.0116694	0.008125	0	0	0	0	0							0.607323	0.347041	0.0867604	0.00443308	0.00269231	0.00153846	0.000384615	4	0.142857	0.571429
				1.17594	0.313584	0.078396	0.0318894	0.0375	0.01	0.0025	4	0.0666667	0.266667							0.560279	0.791698	0.17052	0.0631554	0.0353846	0.05	0.0107692	4.64286	0.304348	1.41304
				0.529241	0.982875	0.189014	0.0165331	0.00875	0.01625	0.003125	5.2	0.357143	1.85714							0.625401	0.456374	0.118319	0.0227546	0.0142308	0.0103846	0.00269231	0	0.189189	0.72973
				0.85119	0.574058	0.118771	0.0631469	0.05375	0.03625	0.0075	4.83333	0.139535	0.674419							0.391389	0	0	0.00393077	0.00153846	0	0	0	0	0
				0.586132	0.761972	0.234453	0.0106631	0.00625	0.008125	0.0025	3.25	0.4	1.3							0.586709	0.370553	0.0926383	0.0124554	0.00730769	0.00461538	0.00115385	0	0.157895	0.631579
				0.18125	0.453124	0.0906249	0.0137931	0.0025	0.00625	0.00125	5	0.5	2.5							0.835921	0.398057	0.0995144	0.0193246	0.0161538	0.00769231	0.00192308	4	0.119048	0.47619
				0.420698	0	0	0.0103994	0.004375	0	0	0	0	0							0.689195	0.689195	0.172299	0.0178581	0.0123077	0.0123077	0.00307692	4	0.25	1
				0.675856	0.508442	0.111609	0.100798	0.068125	0.05125	0.01125	4.55556	0.165138	0.752294							0.846024	0.338409	0.0846024	0.00454615	0.00384615	0.00153846	0.000384615	4	0.1	0.4
				0.95511	0	0	0.00392625	0.00375	0	0	0	0	0							0.645494	0.387297	0.103279	0.0148962	0.00961538	0.00576923	0.00153846	3.75	0.16	0.6
				0.712398	1.14359	0.187473	0.0333381	0.02375	0.038125	0.00625	6.1	0.263158	1.60526							0.822481	0.630569	0.13708	0.0140288	0.0115385	0.00884615	0.00192308	4.6	0.166667	0.766667
				0.437976	0.850925	0.175191	0.0499456	0.021875	0.0425	0.00875	4.85714	0.4	1.94286							0.584321	0.470703	0.129849	0.0236962	0.0138462	0.0111538	0.00307692	3.625	0.222222	0.805556
				0.57606	0.715109	0.168845	0.0629275	0.03625	0.045	0.010625	4.23529	0.293103	1.24138							0.675942	0.535121	0.140821	0.0136562	0.00923077	0.00730769	0.00192308	3.8	0.208333	0.791667
				0.658103	0.0731226	0.0243742	0.0256419	0.016875	0.001875	0.000625	3	0.037037	0.111111							0.607165	0.636077	0.144563	0.0133027	0.00807692	0.00846154	0.00192308	4.4	0.238095	1.04762
				0.348057	0.0949247	0.0316416	0.0197525	0.006875	0.001875	0.000625	3	0.0909091	0.272727							0.749251	0.999001	0.24975	0.00924	0.00692308	0.00923077	0.00230769	4	0.333333	1.33333
				0.68723	0.607053	0.1489	0.0545669	0.0375	0.033125	0.008125	4.07692	0.216667	0.883333							0.828717	0.65425	0.174467	0.00881808	0.00730769	0.00576923	0.00153846	3.75	0.210526	0.789474
				0.597263	0.571295	0.12984	0.0240681	0.014375	0.01375	0.003125	4.4	0.217391	0.956522							0.615574	0.747483	0.175878	0.0262419	0.0161538	0.0196154	0.00461538	0	0.285714	1.21429
				0.788042	0.788042	0.152524	0.0245863	0.019375	0.019375	0.00375	5.16667	0.193548	1							0.688506	0.76098	0.217423	0.0106138	0.00730769	0.00807692	0.00230769	3.5	0.315789	1.10526
				0.687417	0.783336	0.22381	0.0390956	0.026875	0.030625	0.00875	3.5	0.325581	1.13953							0.589598	0.71594	0.210571	0.00913269	0.00538462	0.00653846	0.00192308	3.4	0.357143	1.21429
				0.755718	0.584612	0.156847	0.0438325	0.033125	0.025625	0.006875	3.72727	0.207547	0.773585							0.795657	0.748853	0.187213	0.00821769	0.00653846	0.00615385	0.00153846	4	0.235294	0.941176
				0.392465	0	0	0.0079625	0.003125	0	0	0	0	0							0.56101	1.6129	0.350631	0.00548462	0.00307692	0.00884615	0.00192308	4.6	0.625	2.875
				0.804002	0.446668	0.0893336	0.00699625	0.005625	0.003125	0.000625	5	0.111111	0.555556							0.621086	0	0	0.00743115	0.00461538	0	0	0	0	0
				0.816806	0.594761	0.174463	0.0788131	0.064375	0.046875	0.01375	3.40909	0.213592	0.728155							1.13229	0.691954	0.188715	0.0122285	0.0138462	0.00846154	0.00230769	3.66667	0.166667	0.611111
				0.744417	0.578991	0.165426	0.00755625	0.005625	0.004375	0.00125	3.5	0.222222	0.777778							0.594012	0.213844	0.0554412	0.0485615	0.0288462	0.0103846	0.00269231	3.85714	0.0933333	0.36
				0.669339	1.35982	0.204325	0.0887069	0.059375	0.120625	0.018125	6.65517	0.305263	2.03158							0.803988	2.35836	0.535992	0.00717577	0.00576923	0.0169231	0.00384615	0	0.666667	2.93333
				0.298835	0	0	0.00627437	0.001875	0	0	0	0	0							0.859402	0	0	0.00895077	0.00769231	0	0	0	0	0
				0.305126	1.16965	0.203417	0.01229	0.00375	0.014375	0.0025	5.75	0.666667	3.83333							0.561903	0.468252	0.0936505	0.00821385	0.00461538	0.00384615	0.000769231	5	0.166667	0.833333
				0.581734	0.8726	0.193911	0.0128925	0.0075	0.01125	0.0025	4.5	0.333333	1.5							0.812022	0.774687	0.168004	0.0412077	0.0334615	0.0319231	0.00692308	4.61111	0.206897	0.954023
				0.661688	0	0	0.00661188	0.004375	0	0	0	0	0							0.697999	0.542888	0.155111	0.00495923	0.00346154	0.00269231	0.000769231	3.5	0.222222	0.777778
				0.711386	0	0	0.0149356	0.010625	0	0	0	0	0							0.778271	1.32306	0.389135	0.00494192	0.00384615	0.00653846	0.00192308	3.4	0.5	1.7
				1.71123	0.641711	0.213904	0.00292187	0.005	0.001875	0.000625	3	0.125	0.375							0.448498	0.597997	0.149499	0.00514538	0.00230769	0.00307692	0.000769231	4	0.333333	1.33333
				0.480872	1.5886	0.274784	0.0727844	0.035	0.115625	0.02	5.78125	0.571429	3.30357							1.22404	0.778932	0.222552	0.0103692	0.0126923	0.00807692	0.00230769	3.5	0.181818	0.636364
				0.338746	0.925905	0.135498	0.0276756	0.009375	0.025625	0.00375	6.83333	0.4	2.73333							1.06619	0.308633	0.0841727	0.0137081	0.0146154	0.00423077	0.00115385	3.66667	0.0789474	0.289474
				1.00695	0.906253	0.20139	0.00620687	0.00625	0.005625	0.00125	4.5	0.2	0.9							0.790282	0.767702	0.225795	0.0170338	0.0134615	0.0130769	0.00384615	3.4	0.285714	0.971429
				0.697696	0.759713	0.186052	0.0403112	0.028125	0.030625	0.0075	4.08333	0.266667	1.08889							0.75061	0.562957	0.140739	0.00819846	0.00615385	0.00461538	0.00115385	4	0.1875	0.75
				0.58984	0.766792	0.22119	0.0423844	0.025	0.0325	0.009375	3.46667	0.375	1.3							0.449611	0.256921	0.0642302	0.00598808	0.00269231	0.00153846	0.000384615	4	0.142857	0.571429
				0.947903	0.758323	0.151665	0.0164837	0.015625	0.0125	0.0025	5	0.16	0.8							0.898252	0.620221	0.149709	0.0359673	0.0323077	0.0223077	0.00538462	4.14286	0.166667	0.690476
				0.972971	0.511222	0.131928	0.0378994	0.036875	0.019375	0.005	3.875	0.135593	0.525424							0.329345	0.658689	0.219563	0.00700692	0.00230769	0.00461538	0.00153846	3	0.666667	2
				0.830526	0.553684	0.138421	0.0270912	0.0225	0.015	0.00375	4	0.166667	0.666667							0.601097	0.695018	0.13149	0.0204754	0.0123077	0.0142308	0.00269231	5.28571	0.21875	1.15625
				0.626587	0.367309	0.118835	0.0578531	0.03625	0.02125	0.006875	3.09091	0.189655	0.586207							0.805077	0	0	0.00812154	0.00653846	0	0	0	0	0
				0.650771	0.661992	0.157083	0.0557031	0.03625	0.036875	0.00875	4.21429	0.241379	1.01724							0.557802	0	0	0.0110323	0.00615385	0	0	0	0	0
				0.598369	0.445298	0.12524	0.0449137	0.026875	0.02	0.005625	3.55556	0.209302	0.744186							0.231	0.3465	0.1155	0.00333	0.000769231	0.00115385	0.000384615	3	0.5	1.5
				0.770905	0.770905	0.181389	0.0137825	0.010625	0.010625	0.0025	4.25	0.235294	1							0.663755	0.104803	0.0349345	0.0110096	0.00730769	0.00115385	0.000384615	3	0.0526316	0.157895
				0.108725	0.924164	0.163088	0.0114969	0.00125	0.010625	0.001875	5.66667	1.5	8.5							0.648268	1.01871	0.277829	0.00415308	0.00269231	0.00423077	0.00115385	3.66667	0.428571	1.57143
				0.661907	0.898303	0.165477	0.0264388	0.0175	0.02375	0.004375	5.42857	0.25	1.35714							0.423213	0.687722	0.158705	0.00727038	0.00307692	0.005	0.00115385	4.33333	0.375	1.625
				0.451467	0.257981	0.0644953	0.00969063	0.004375	0.0025	0.000625	4	0.142857	0.571429							0.580102	0.193367	0.0966837	0.00397808	0.00230769	0.000769231	0.000384615	0	0.166667	0.333333
				0.92034	1.12486	0.30678	0.00611188	0.005625	0.006875	0.001875	3.66667	0.333333	1.22222							0.507958	0.12699	0.0423298	0.00908615	0.00461538	0.00115385	0.000384615	3	0.0833333	0.25
				0.526806	0.162094	0.0405236	0.0154231	0.008125	0.0025	0.000625	4	0.0769231	0.307692							0.466853	0	0	0.00659077	0.00307692	0	0	0	0	0
				0.510926	0.609181	0.157208	0.031805	0.01625	0.019375	0.005	3.875	0.307692	1.19231							1.10775	0.704935	0.20141	0.00381923	0.00423077	0.00269231	0.000769231	3.5	0.181818	0.636364
				0.711422	0	0	0.00966375	0.006875	0	0	0	0	0							0.768246	0.768246	0.256082	0.00150192	0.00115385	0.00115385	0.000384615	3	0.333333	1
				0.291078	0.291078	0.0727696	0.00858875	0.0025	0.0025	0.000625	4	0.25	1							0.580102	0.676786	0.193367	0.00397808	0.00230769	0.00269231	0.000769231	3.5	0.333333	1.16667
				0.568182	1.13636	0.227273	0.0055	0.003125	0.00625	0.00125	5	0.4	2							0.599042	0.798722	0.249601	0.00770462	0.00461538	0.00615385	0.00192308	3.2	0.416667	1.33333
				0.515603	0.316393	0.105464	0.0533356	0.0275	0.016875	0.005625	3	0.204545	0.613636							1.15595	1.57629	0.315259	0.00366	0.00423077	0.00576923	0.00115385	0	0.272727	1.36364
				1.10718	0.404548	0.042584	0.0293538	0.0325	0.011875	0.00125	9.5	0.0384615	0.365385							0.229542	0.229542	0.114771	0.00335115	0.000769231	0.000769231	0.000384615	2	0.5	1
				1.16713	0.70028	0.233427	0.0026775	0.003125	0.001875	0.000625	3	0.2	0.6							0.134916	0.809498	0.134916	0.00285077	0.000384615	0.00230769	0.000384615	0	1	6
				0.518403	0.388802	0.129601	0.009645	0.005	0.00375	0.00125	3	0.25	0.75							0.640273	0.426849	0.106712	0.00360423	0.00230769	0.00153846	0.000384615	4	0.166667	0.666667
				0.651466	0	0	0.00287813	0.001875	0	0	0	0	0							0.199164	0.863042	0.199164	0.00579346	0.00115385	0.005	0.00115385	0	1	4.33333
				0.253216	0.126608	0.0253216	0.0246825	0.00625	0.003125	0.000625	5	0.1	0.5							0.492672	0	0	0.00312269	0.00153846	0	0	0	0	0
				0.327091	0	0	0.00764312	0.0025	0	0	0	0	0							0.856374	0	0	0.00314385	0.00269231	0	0	0	0	0
				0.0991473	2.18124	0.495737	0.00630375	0.000625	0.01375	0.003125	4.4	5	22							0.752344	0.347236	0.0964543	0.0199377	0.015	0.00692308	0.00192308	3.6	0.128205	0.461538
				0.401929	0	0	0.00933	0.00375	0	0	0	0	0							0.701297	0.350649	0.100185	0.00767808	0.00538462	0.00269231	0.000769231	3.5	0.142857	0.5
				0.665262	1.88491	0.221754	0.00563688	0.00375	0.010625	0.00125	8.5	0.333333	2.83333							0.659449	0.549541	0.164862	0.00699885	0.00461538	0.00384615	0.00115385	3.33333	0.25	0.833333
				0.690317	0.512662	0.101517	0.123132	0.085	0.063125	0.0125	5.05	0.147059	0.742647							0.40843	0	0	0.00941692	0.00384615	0	0	0	0	0
				0.896072	0.824066	0.232019	0.0781188	0.07	0.064375	0.018125	3.55172	0.258929	0.919643							0.180995	0.904977	0.180995	0.006375	0.00115385	0.00576923	0.00115385	5	1	5
				0.681663	0.436504	0.12557	0.104524	0.07125	0.045625	0.013125	3.47619	0.184211	0.640351							0.435378	0	0	0.00618385	0.00269231	0	0	0	0	0
				1.06949	0.0432117	0.0108029	0.115709	0.12375	0.005	0.00125	4	0.010101	0.040404							0.277412	0	0	0.00554577	0.00153846	0	0	0	0	0
				0.620739	0	0	0.0563844	0.035	0	0	0	0	0							0	0.860832	0.286944	0.00134038	0	0.00115385	0.000384615	3	0	0
				0.192289	0.448675	0.0640964	0.0195019	0.00375	0.00875	0.00125	7	0.333333	2.33333							0.531249	0	0	0.0101358	0.00538462	0	0	0	0	0
				0.756086	0	0	0.0371981	0.028125	0	0	0	0	0							0	3.88937	0.864304	0.00089	0	0.00346154	0.000769231	0	0	0
				0.477555	0	0	0.0130875	0.00625	0	0	0	0	0							0.498306	1.29559	0.199322	0.00385923	0.00192308	0.005	0.000769231	0	0.4	2.6
				0.559499	0.979124	0.139875	0.0178731	0.01	0.0175	0.0025	7	0.25	1.75							0.155424	0	0	0.00494923	0.000769231	0	0	0	0	0
				0.422633	1.09387	0.174025	0.02514	0.010625	0.0275	0.004375	6.28571	0.411765	2.58824							0.612819	0.0819969	0.0129469	0.0891215	0.0546154	0.00730769	0.00115385	6.33333	0.0211268	0.133803
				0.627934	0	0	0.0209019	0.013125	0	0	0	0	0							0.289318	0	0	0.00664692	0.00192308	0	0	0	0	0
				0.571278	0	0	0.0142225	0.008125	0	0	0	0	0							0.126081	0.226946	0.0378243	0.0305054	0.00384615	0.00692308	0.00115385	0	0.3	1.8
				0.446677	0	0	0.135724	0.060625	0	0	0	0	0							1.0445	0	0	0.0139927	0.0146154	0	0	0	0	0
				0.789953	0.520651	0.125674	0.0696244	0.055	0.03625	0.00875	4.14286	0.159091	0.659091							0.593403	0.271976	0.0741753	0.10889	0.0646154	0.0296154	0.00807692	0	0.125	0.458333
				0.531526	0	0	0.00940688	0.005	0	0	0	0	0							0.60755	0.386623	0.0828478	0.0278546	0.0169231	0.0107692	0.00230769	0	0.136364	0.636364
				0.581018	0	0	0.0182869	0.010625	0	0	0	0	0							0.381266	0.1204	0.0401332	0.0191669	0.00730769	0.00230769	0.000769231	0	0.105263	0.315789
				0.574957	0	0	0.0250019	0.014375	0	0	0	0	0							0.984694	0.513754	0.107032	0.0179673	0.0176923	0.00923077	0.00192308	0	0.108696	0.521739
				0.539645	0	0	0.0486431	0.02625	0	0	0	0	0							0.506681	0.0214695	0.00429391	0.0895723	0.0453846	0.00192308	0.000384615	0	0.00847458	0.0423729
				0.437754	0	0	0.04426	0.019375	0	0	0	0	0							0.729052	0	0	0.0163542	0.0119231	0	0	0	0	0
				0.72545	0	0	0.00947688	0.006875	0	0	0	0	0							0.442295	0	0	0.0269573	0.0119231	0	0	0	0	0
				0.901675	0	0	0.0298056	0.026875	0	0	0	0	0							0.555143	0.440849	0.10613	0.0471119	0.0261538	0.0207692	0.005	0	0.191176	0.794118
				0.496278	0	0	0.0050375	0.0025	0	0	0	0	0							0.738349	0.477755	0.101342	0.0265665	0.0196154	0.0126923	0.00269231	0	0.137255	0.647059
				0.261741	0	0	0.016715	0.004375	0	0	0	0	0							0.654398	0.367101	0.0798046	0.0240973	0.0157692	0.00884615	0.00192308	0	0.121951	0.560976
				0.218126	0.436253	0.109063	0.0114613	0.0025	0.005	0.00125	4	0.5	2							0.664396	0.534188	0.116854	0.1152	0.0765385	0.0615385	0.0134615	0	0.175879	0.80402
				0.281658	0	0	0.011095	0.003125	0	0	0	0	0							0.453733	0.0437333	0.0109333	0.0703565	0.0319231	0.00307692	0.000769231	0	0.0240964	0.0963855
				0.91664	0	0	0.0115912	0.010625	0	0	0	0	0							0.521089	0.374667	0.0925902	0.17862	0.0930769	0.0669231	0.0165385	4.04651	0.177686	0.719008
				0.41974	0	0	0.0104231	0.004375	0	0	0	0	0							0.240427	0.305998	0.0874279	0.0175969	0.00423077	0.00538462	0.00153846	3.5	0.363636	1.27273
				0.107481	0	0	0.01163	0.00125	0	0	0	0	0							0.466524	0	0	0.0354504	0.0165385	0	0	0	0	0
				0.125937	0	0	0.00992563	0.00125	0	0	0	0	0							0.365714	1.50857	0.274286	0.00841346	0.00307692	0.0126923	0.00230769	5.5	0.75	4.125
				0.355556	0.711111	0.177778	0.00351563	0.00125	0.0025	0.000625	4	0.5	2							0.0505293	2.67805	0.37897	0.0152235	0.000769231	0.0407692	0.00576923	0	7.5	53
				0.317489	0.725689	0.136067	0.01378	0.004375	0.01	0.001875	5.33333	0.428571	2.28571							0.32049	0	0	0.0108008	0.00346154	0	0	0	0	0
				0.137184	0.548734	0.0685918	0.00911188	0.00125	0.005	0.000625	8	0.5	4							0.172523	0.172523	0.0575076	0.0133762	0.00230769	0.00230769	0.000769231	0	0.333333	1
				0.636424	0.266887	0.075276	0.0913306	0.058125	0.024375	0.006875	3.54545	0.11828	0.419355							0.235676	0	0	0.0146877	0.00346154	0	0	0	0	0
				1.3181	0	0	0.002845	0.00375	0	0	0	0	0							0.463971	0.35508	0.0804848	0.0812385	0.0376923	0.0288462	0.00653846	4.41176	0.173469	0.765306
				0.323771	0.45328	0.129509	0.0193037	0.00625	0.00875	0.0025	3.5	0.4	1.4							0.433361	0	0	0.0195254	0.00846154	0	0	0	0	0
				0.352813	0	0	0.0194863	0.006875	0	0	0	0	0							0.616924	1.50804	0.205641	0.0112219	0.00692308	0.0169231	0.00230769	0	0.333333	2.44444
				0.739937	0	0	0.01267	0.009375	0	0	0	0	0							0.775376	0.476666	0.101689	0.0605165	0.0469231	0.0288462	0.00615385	4.6875	0.131148	0.614754
				0.816035	0.646028	0.119005	0.0367631	0.03	0.02375	0.004375	5.42857	0.145833	0.791667							0.593401	0.49298	0.123245	0.08426	0.05	0.0415385	0.0103846	4	0.207692	0.830769
				0.500462	0	0	0.016235	0.008125	0	0	0	0	0							1.03046	0.435963	0.079266	0.0194088	0.02	0.00846154	0.00153846	5.5	0.0769231	0.423077
				0.686604	0	0	0.0245775	0.016875	0	0	0	0	0							0.892857	0.380291	0.0992063	0.0232615	0.0207692	0.00884615	0.00230769	3.83333	0.111111	0.425926
				0.518737	0.251509	0.0628773	0.03976	0.020625	0.01	0.0025	4	0.121212	0.484848							1.00897	0.44843	0.112108	0.0102923	0.0103846	0.00461538	0.00115385	0	0.111111	0.444444
				0.64338	1.04549	0.21446	0.0233144	0.015	0.024375	0.005	4.875	0.333333	1.625							0.708081	0.507282	0.12682	0.0363931	0.0257692	0.0184615	0.00461538	4	0.179104	0.716418
				0.693559	0.993477	0.262428	0.0333425	0.023125	0.033125	0.00875	3.78571	0.378378	1.43243							0.690863	0.616842	0.172716	0.0311762	0.0215385	0.0192308	0.00538462	3.57143	0.25	0.892857
				0.634863	0.544168	0.136042	0.0137825	0.00875	0.0075	0.001875	4	0.214286	0.857143							0.715583	0.165135	0.0550449	0.00698731	0.005	0.00115385	0.000384615	3	0.0769231	0.230769
				0.394789	0	0	0.0110819	0.004375	0	0	0	0	0							0.780351	0.662116	0.165529	0.0487946	0.0380769	0.0323077	0.00807692	4	0.212121	0.848485
				0.914107	0.78352	0.130587	0.0191444	0.0175	0.015	0.0025	6	0.142857	0.857143							0.705441	0.538363	0.148514	0.0207181	0.0146154	0.0111538	0.00307692	3.625	0.210526	0.763158
				0.723798	0.579039	0.135109	0.0647625	0.046875	0.0375	0.00875	4.28571	0.186667	0.8							0.841561	0.625294	0.131641	0.0818077	0.0688462	0.0511538	0.0107692	4.75	0.156425	0.743017
				0.671042	0.775893	0.188731	0.0298044	0.02	0.023125	0.005625	4.11111	0.28125	1.15625							0.943955	0.417097	0.109762	0.0175204	0.0165385	0.00730769	0.00192308	3.8	0.116279	0.44186
				0.891867	0.433881	0.0964181	0.0259287	0.023125	0.01125	0.0025	4.5	0.108108	0.486486							0.447017	0.402316	0.0894035	0.0172081	0.00769231	0.00692308	0.00153846	4.5	0.2	0.9
				0.619776	0.540317	0.111242	0.0393288	0.024375	0.02125	0.004375	4.85714	0.179487	0.871795							0.592258	0.538416	0.161525	0.0142869	0.00846154	0.00769231	0.00230769	3.33333	0.272727	0.909091
				0.638999	0.278538	0.0655383	0.0381456	0.024375	0.010625	0.0025	4.25	0.102564	0.435897							0.856988	0.887058	0.225523	0.0255815	0.0219231	0.0226923	0.00576923	0	0.263158	1.03509
				0.575966	1.12255	0.211579	0.106343	0.06125	0.119375	0.0225	5.30556	0.367347	1.94898							0.32696	0.20294	0.0563723	0.0341138	0.0111538	0.00692308	0.00192308	0	0.172414	0.62069
				0.538213	0.331208	0.082802	0.0452888	0.024375	0.015	0.00375	4	0.153846	0.615385							0.834942	0.339195	0.104368	0.0147408	0.0123077	0.005	0.00153846	0	0.125	0.40625
				0.556124	0.715016	0.168823	0.0629356	0.035	0.045	0.010625	4.23529	0.303571	1.28571							0.687666	1.08696	0.288376	0.0173385	0.0119231	0.0188462	0.005	3.76923	0.419355	1.58065
				0.241779	0	0	0.00517	0.00125	0	0	0	0	0							0.288927	0.55563	0.111126	0.0173054	0.005	0.00961538	0.00192308	5	0.384615	1.92308
				0.497717	0	0	0.0288819	0.014375	0	0	0	0	0							0.658898	0.379092	0.117338	0.0426119	0.0280769	0.0161538	0.005	0	0.178082	0.575342
				0.484343	0	0	0.0335506	0.01625	0	0	0	0	0							0.738007	0.369004	0.123001	0.0187615	0.0138462	0.00692308	0.00230769	0	0.166667	0.5
				0.646857	0.743198	0.192681	0.0454119	0.029375	0.03375	0.00875	3.85714	0.297872	1.14894							0.731801	0.349013	0.0900678	0.0341623	0.025	0.0119231	0.00307692	3.875	0.123077	0.476923
				0.850129	0.602175	0.17711	0.0352888	0.03	0.02125	0.00625	3.4	0.208333	0.708333							0.511247	0.159765	0.0159765	0.0240738	0.0123077	0.00384615	0.000384615	0	0.03125	0.3125
				0.763905	0	0	0.0130906	0.01	0	0	0	0	0							0.657534	0.474886	0.109589	0.0105288	0.00692308	0.005	0.00115385	0	0.166667	0.722222
				0.706187	0	0	0.0159306	0.01125	0	0	0	0	0							0.645221	0.790066	0.131678	0.0292088	0.0188462	0.0230769	0.00384615	6	0.204082	1.22449
																				0.841696	0.420848	0.129492	0.0118808	0.01	0.005	0.00153846	3.25	0.153846	0.5
			n	231																0.711684	0.837276	0.209319	0.00918731	0.00653846	0.00769231	0.00192308	4	0.294118	1.17647
			mean	0.589647	1.05538	0.193201	0.0468226	0.0323647	0.0376028	0.00712933	3.87521	0.427886	2.40162							0.635358	0.635358	0.158839	0.00726423	0.00461538	0.00461538	0.00115385	4	0.25	1
			STDV	0.249398	1.26274	0.193994	0.095188	0.0796988	0.0519798	0.00957342	2.43205	0.577846	3.46101							0.563222	0.281611	0.0938703	0.00819462	0.00461538	0.00230769	0.000769231	3	0.166667	0.5
			SEM	0.0164092	0.0830821	0.0127639	0.00626291	0.00524379	0.00342002	0.000629885	0.160017	0.0380195	0.227718							0.91202	0.486411	0.121603	0.00632577	0.00576923	0.00307692	0.000769231	4	0.133333	0.533333
			SUM	136.208	243.793	44.6293	10.816	7.47625	8.68625	1.64688	895.174	98.8417	554.775							0.76134	0.520917	0.140247	0.0191969	0.0146154	0.01	0.00269231	3.71429	0.184211	0.684211
																				0.678108	0.339054	0.0782432	0.0147469	0.01	0.005	0.00115385	4.33333	0.115385	0.5
																				0.740552	0.603643	0.105793	0.0618042	0.0457692	0.0373077	0.00653846	5.70588	0.142857	0.815126
																				0.729923	0.493469	0.138788	0.0748235	0.0546154	0.0369231	0.0103846	3.55556	0.190141	0.676056
																				0.651617	0.658857	0.181005	0.0531223	0.0346154	0.035	0.00961538	3.64	0.277778	1.01111
																				0.707586	0.602201	0.18066	0.0255473	0.0180769	0.0153846	0.00461538	3.33333	0.255319	0.851064
																				0.613298	0.192407	0.0601272	0.0319835	0.0196154	0.00615385	0.00192308	3.2	0.0980392	0.313725
																				0.938257	0.714196	0.168046	0.027465	0.0257692	0.0196154	0.00461538	4.25	0.179104	0.761194
																				0.575316	0.474636	0.10068	0.0267412	0.0153846	0.0126923	0.00269231	4.71429	0.175	0.825
																				0.551012	0.740422	0.18941	0.0223365	0.0123077	0.0165385	0.00423077	3.90909	0.34375	1.34375
																				0.602381	0.530095	0.168667	0.0159623	0.00961538	0.00846154	0.00269231	3.14286	0.28	0.88
																				0.625346	0.420906	0.144311	0.0319823	0.02	0.0134615	0.00461538	2.91667	0.230769	0.673077
																				0.738036	0.932256	0.233064	0.00990154	0.00730769	0.00923077	0.00230769	4	0.315789	1.26316
																				0.472262	0	0	0.0122162	0.00576923	0	0	0	0	0
																				0.281576	0.250289	0.0625723	0.0122935	0.00346154	0.00307692	0.000769231	4	0.222222	0.888889
																				0.735081	0.445504	0.111376	0.0172665	0.0126923	0.00769231	0.00192308	4	0.151515	0.606061
																				0.691563	0.968188	0.138313	0.00834231	0.00576923	0.00807692	0.00115385	7	0.2	1.4
																				0.323171	2.20834	0.538619	0.00714077	0.00230769	0.0157692	0.00384615	4.1	1.66667	6.83333
																				0.786988	0.590241	0.196747	0.00586462	0.00461538	0.00346154	0.00115385	3	0.25	0.75
																				0.77703	0.25901	0.0740028	0.0103946	0.00807692	0.00269231	0.000769231	3.5	0.0952381	0.333333
																				0.46729	0.46729	0.116822	0.00329231	0.00153846	0.00153846	0.000384615	4	0.25	1
																				0.577605	0	0	0.00466115	0.00269231	0	0	0	0	0
																				0.451926	0	0	0.0102127	0.00461538	0	0	0	0	0
																				0.753151	0.240087	0.049333	0.116945	0.0880769	0.0280769	0.00576923	4.86667	0.0655022	0.318777
																				0.945403	0	0	0.00325462	0.00307692	0	0	0	0	0
																				0.551998	0	0	0.0104515	0.00576923	0	0	0	0	0
																				0.469529	1.18449	0.202751	0.0360427	0.0169231	0.0426923	0.00730769	5.84211	0.431818	2.52273
																				0.321797	0.117017	0.0292543	0.0131473	0.00423077	0.00153846	0.000384615	4	0.0909091	0.363636
																				0.56794	0	0	0.00270885	0.00153846	0	0	0	0	0
																				0.309655	0.743172	0.123862	0.00621038	0.00192308	0.00461538	0.000769231	6	0.4	2.4
																				0.615669	0	0	0.00249885	0.00153846	0	0	0	0	0
																				0.185506	1.42221	0.309176	0.00622	0.00115385	0.00884615	0.00192308	4.6	1.66667	7.66667
																			n	268
																			mean	0.558243	0.870575	0.179814	0.0317924	0.0201722	0.0239452	0.00486079	3.17067	0.418445	2.16759
																			STDV	0.228596	0.99048	0.170437	0.121087	0.0947816	0.0767788	0.0148499	2.26288	0.658051	4.24641
																			SEM	0.0139637	0.0605032	0.0104111	0.00739659	0.00578971	0.00469001	0.000907102	0.138227	0.0401969	0.259391
																			SUM	149.609	233.314	48.1901	8.52037	5.40615	6.41731	1.30269	849.74	112.143	580.913
